# Supplementary material for: Lewis acid sites and flexible active centers synergistically boost efficient electrochemical ammonia synthesis
Source: Royal Society of Chemistry journal article supplement (doi:10.1039/d4ta04884a), 2024-01-01
Supplement: d4ta04884a1.pdf [file d4ta04884a1.pdf]

Supporting Information

**Lewis acid sites and flexible active center synergistically boost  
efficient electrochemical ammonia synthesis**

Li-Bo Chen, Tong-Hui Wang, Xing-You Lang,\* Q. Jiang\*

*Key Laboratory of Automobile Materials, Ministry of Education, and School of  
Materials Science and Engineering, Jilin University, Changchun 130022, China*

---

\*Correspondence and requests for materials should be addressed to X. Y. L. and Q. J.  
(e-mail: [xylang@jlu.edu.cn](mailto:xylang@jlu.edu.cn), [jiangq@jlu.edu.cn](mailto:jiangq@jlu.edu.cn)).

## Supplementary Figs.

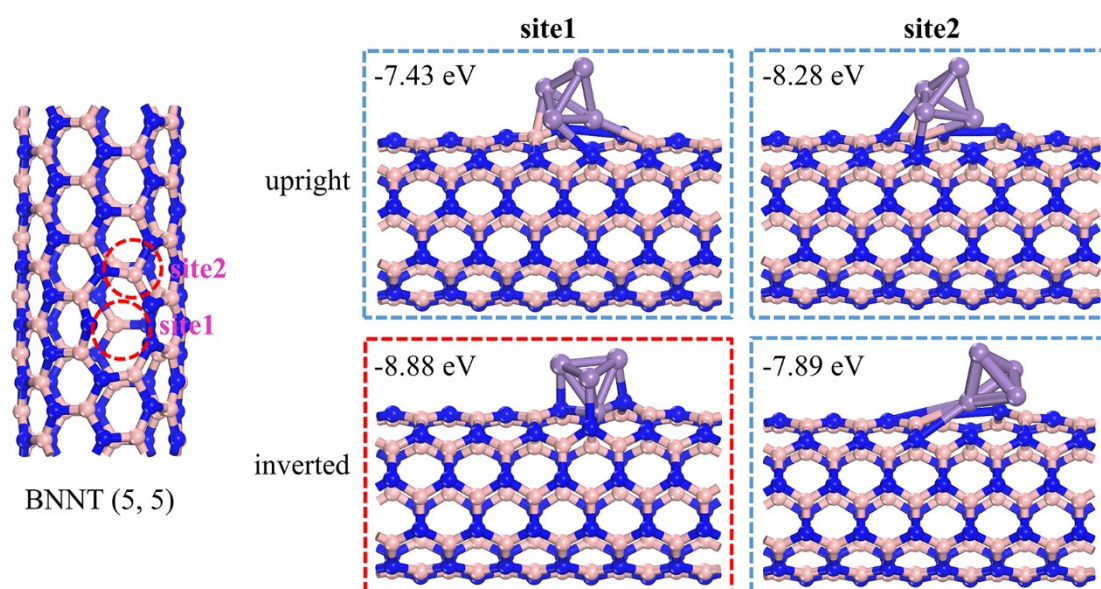

**Fig. S1** Binding energy for Mn<sub>4</sub> cluster coupling with (5, 5) BNNT through different sites and forms of orientation.

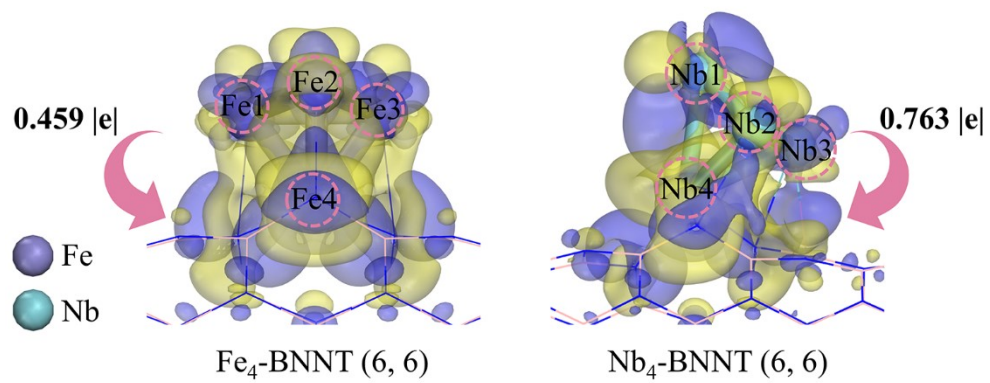

**Fig. S2** Electron density difference and corresponding charge transfer (from  $\text{TM}_4$  to BNNT substrate) for  $\text{Fe}_4/\text{BNNT (6, 6)}$  and  $\text{Nb}_4/\text{BNNT (6, 6)}$ . Isosurface value is  $0.0008 \text{ e}/\text{\AA}^3$ , where the blue and yellow isosurface indicate electron density accumulation and depletion, respectively.

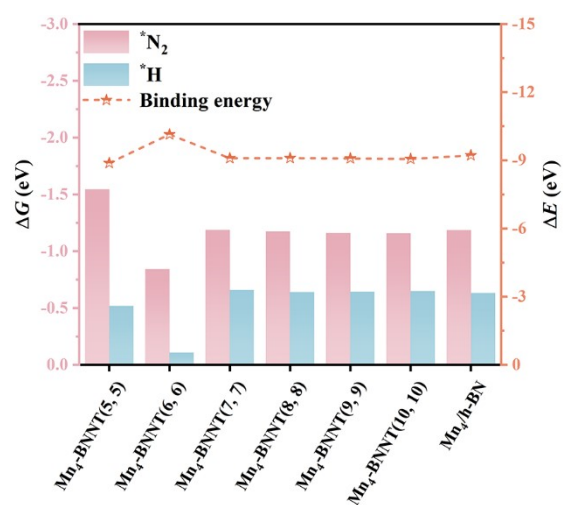

**Fig. S3** Binding energy of Mn<sub>4</sub>/BNNT (*n, n*) (*n* = 5, 6, 7, 8, 9, 10) with different armchair chirality, along with Mn<sub>4</sub>/h-BN monolayer. Δ*G* for chemisorption of \*N<sub>2</sub> and \*H is also depicted in the figure.

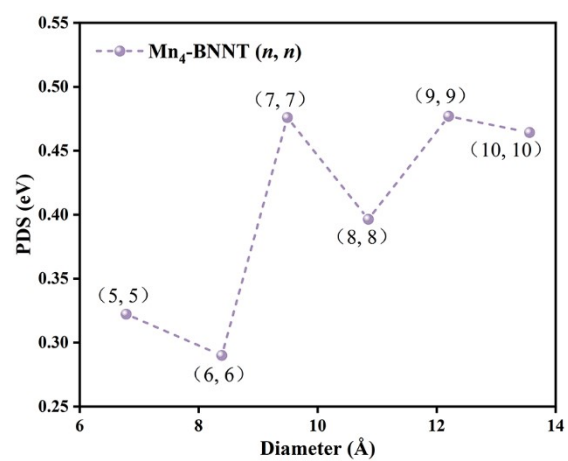

**Fig. S4** A schematic diagram illustrating the reaction free energy for the PDS of  $\text{Mn}_4/\text{BNNT}$  ( $n, n$ ) as a function of diameter.

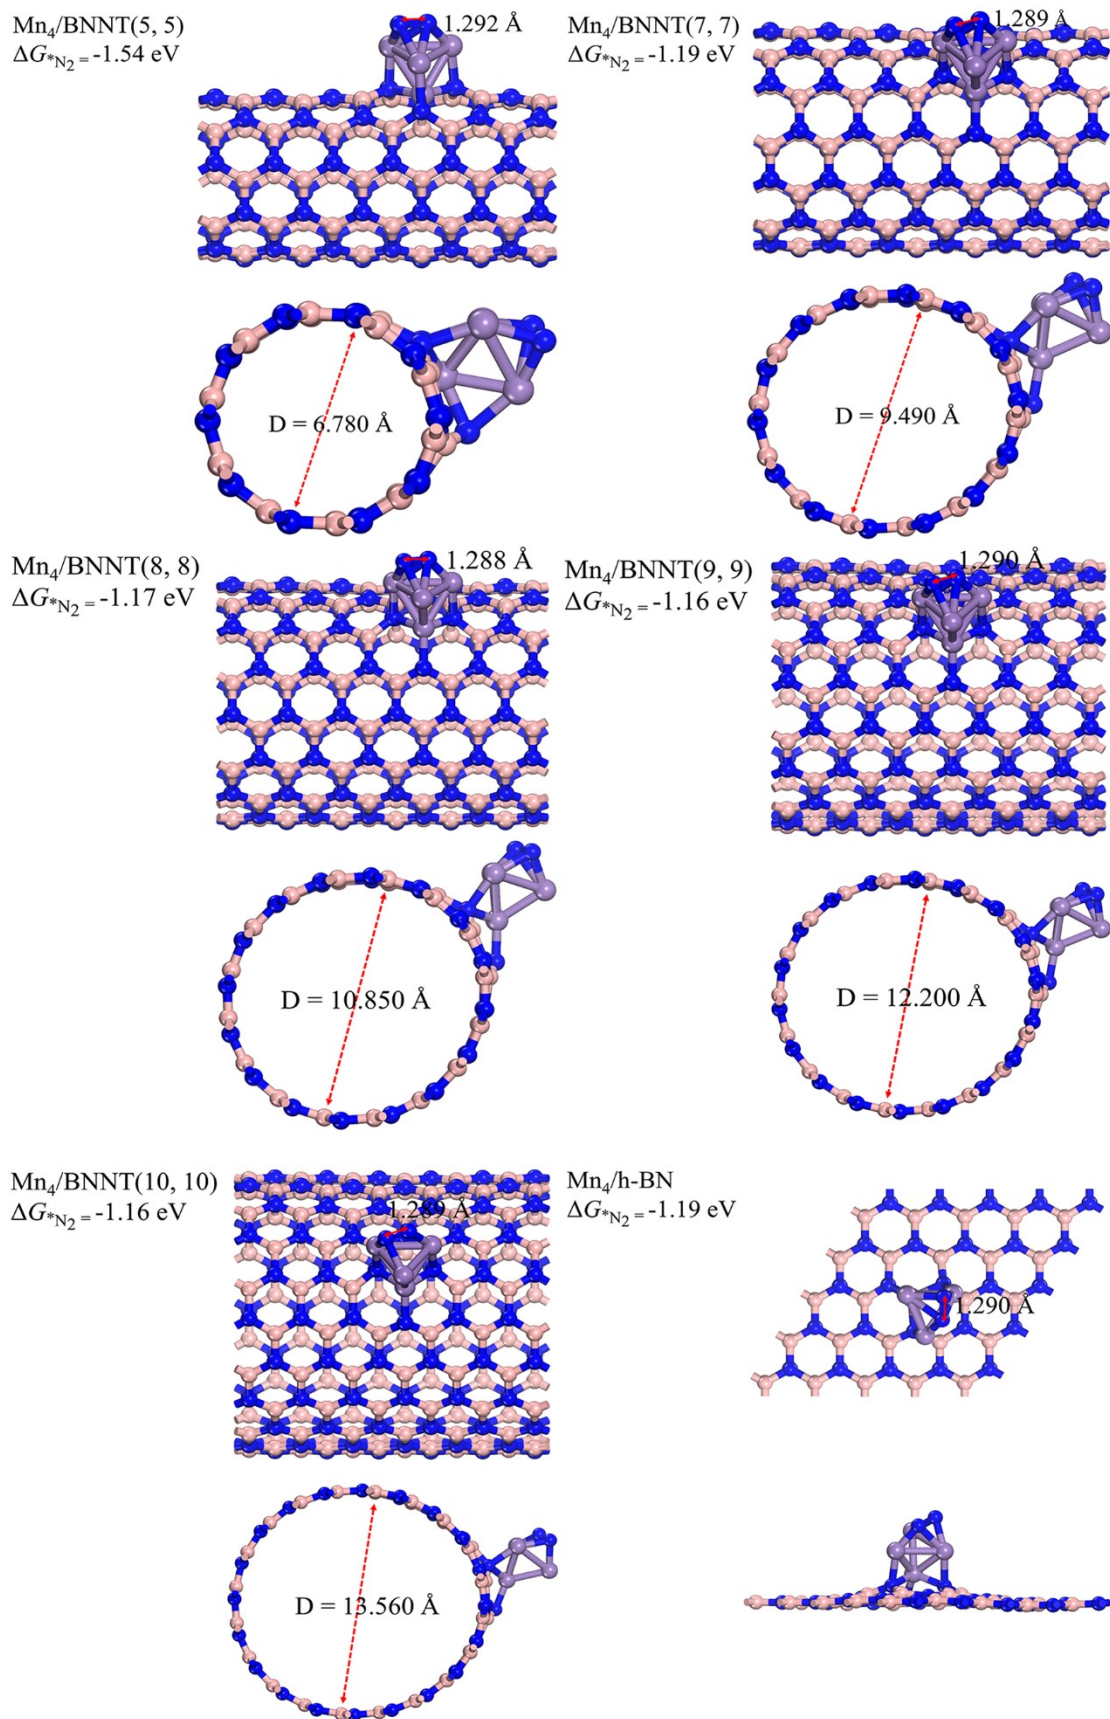

**Fig. S5** Atomic structures for  $\text{N}_2$  adsorbed on BNNT ( $n, n$ ) with different armchair chirality and h-

BN monolayer. The bond length and  $\Delta G_{N_2}^*$  are presented for each system.

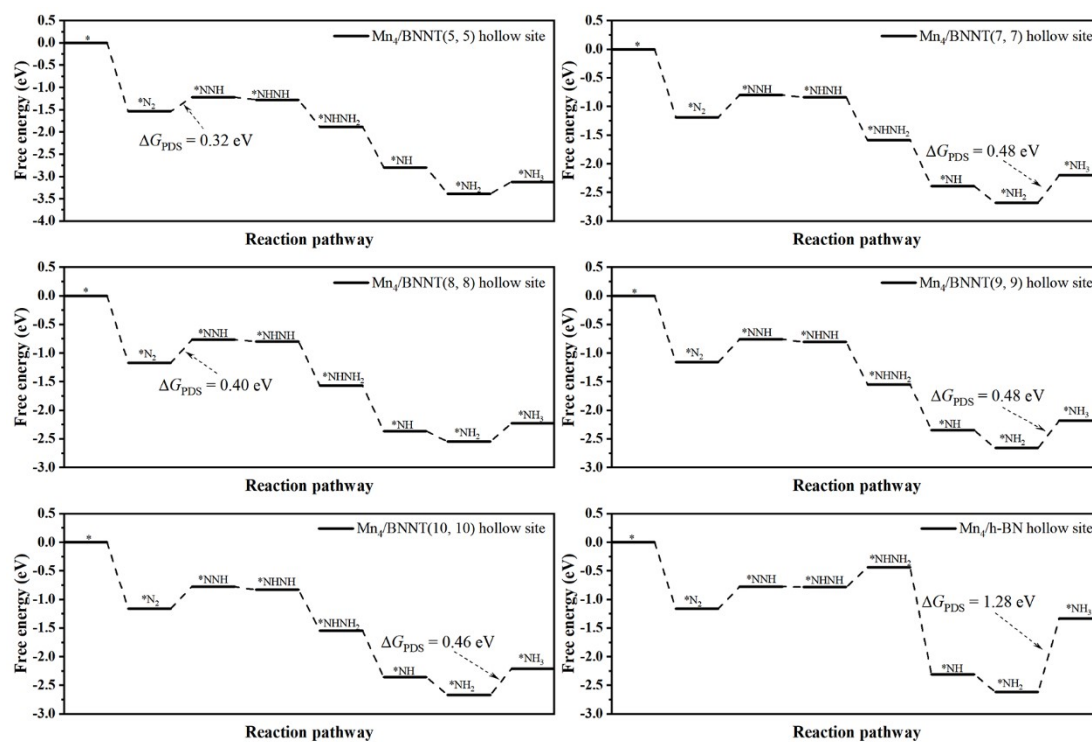

**Fig. S6** Reaction pathway of NRR on Mn<sub>4</sub>/BNNT with armchair chirality including (5, 5), (7, 7), (8, 8), (9, 9), (10, 10). The free energy profiles and PDS are shown.



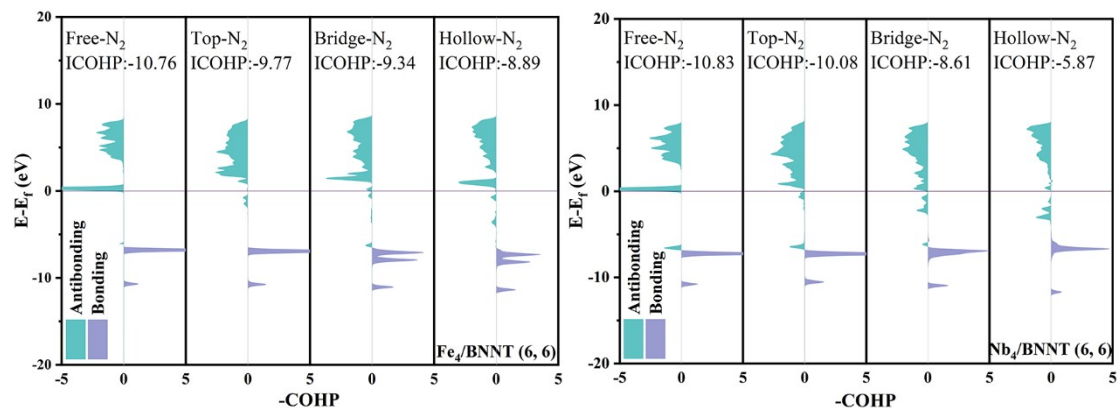

**Fig. S7** Analysis of crystal orbital Hamilton population (COHP) and their integration (ICOHP) of N<sub>2</sub> on different site of Fe<sub>4</sub>/BNNT (6, 6) and Nb<sub>4</sub>/BNNT (6, 6).

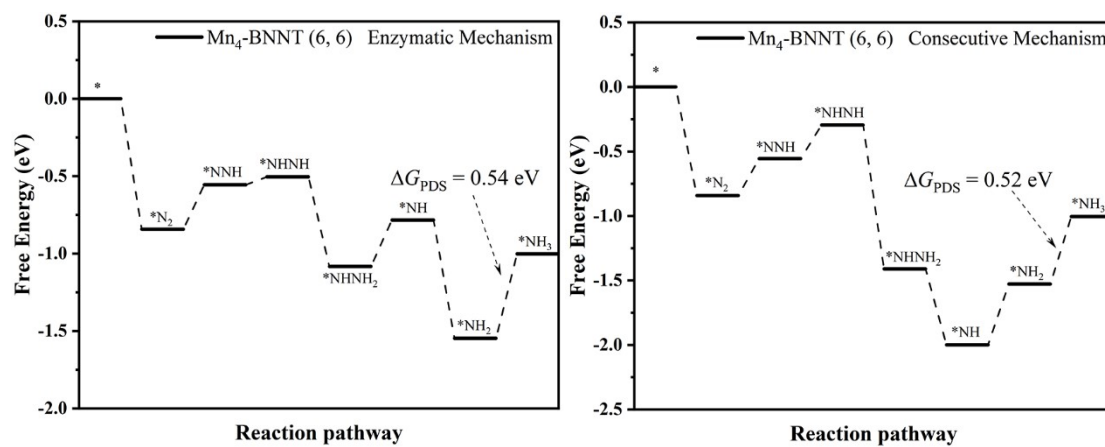

**Fig. S8** NRR reaction pathway of Mn<sub>4</sub>/BNNT (6, 6) via enzymatic and consecutive mechanism. The free energy profiles and the potential determining step (PDS) are shown.

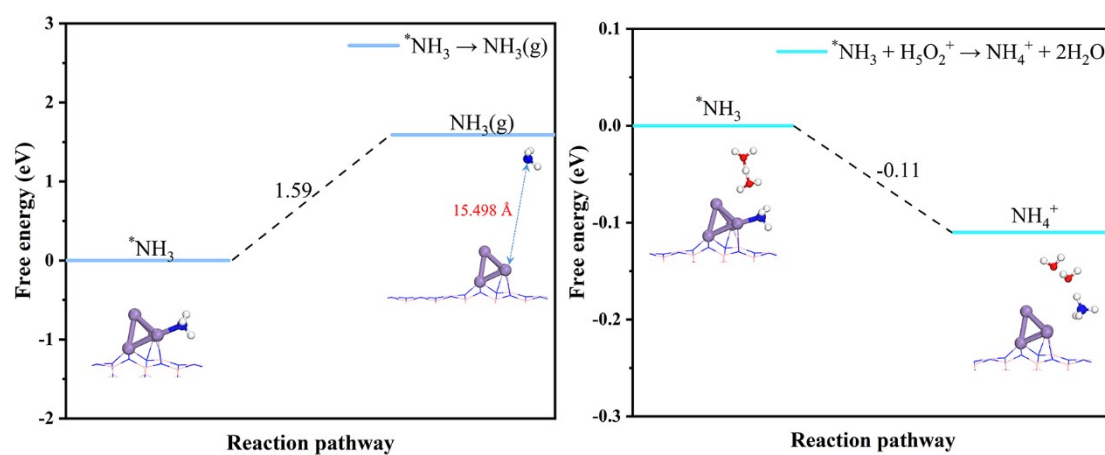

**Fig. S9** Reaction pathway of  $^*\text{NH}_3$  desorption and  $\text{NH}_4^+$  formation on  $\text{Mn}_4/\text{BNNT}$  (6, 6). The protons come from  $\text{H}_5\text{O}_2^+$ . The solvation model is used with a dielectric constant of 78.54.

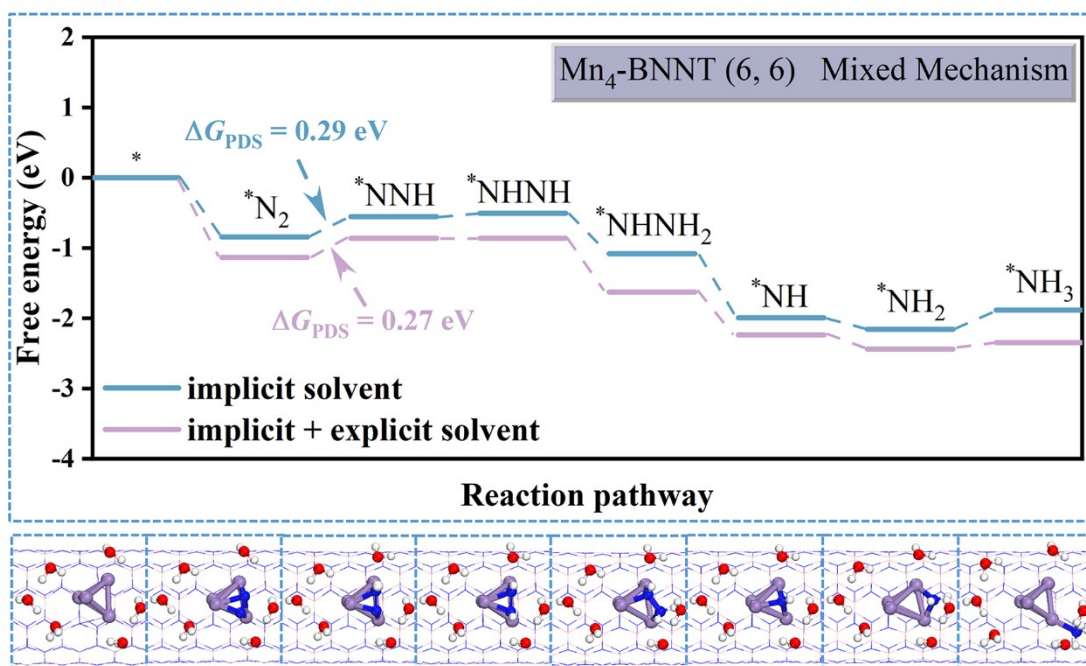

**Fig. S10** Comparison between implicit solvent and "implicit + explicit" solvent.

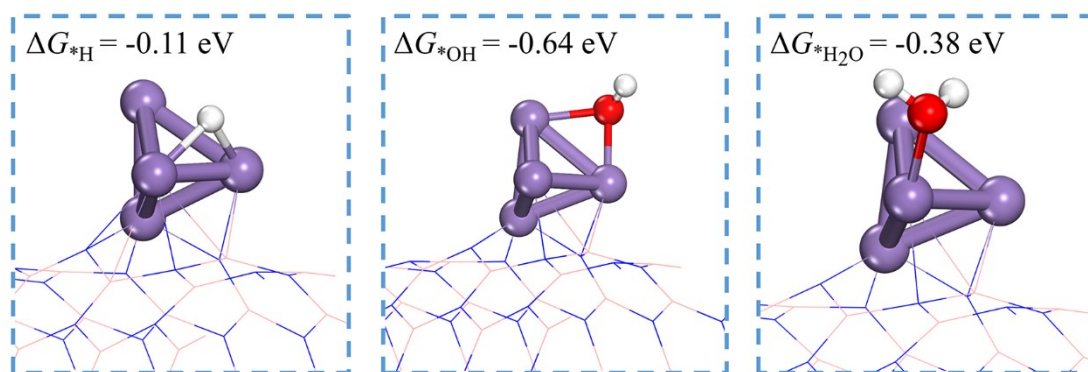

**Fig. S11** Adsorption configurations of  $^*H$ ,  $^*OH$  and  $^*H_2O$  on the  $Mn_4/BNNT$  (6, 6) and corresponding adsorption free energy.

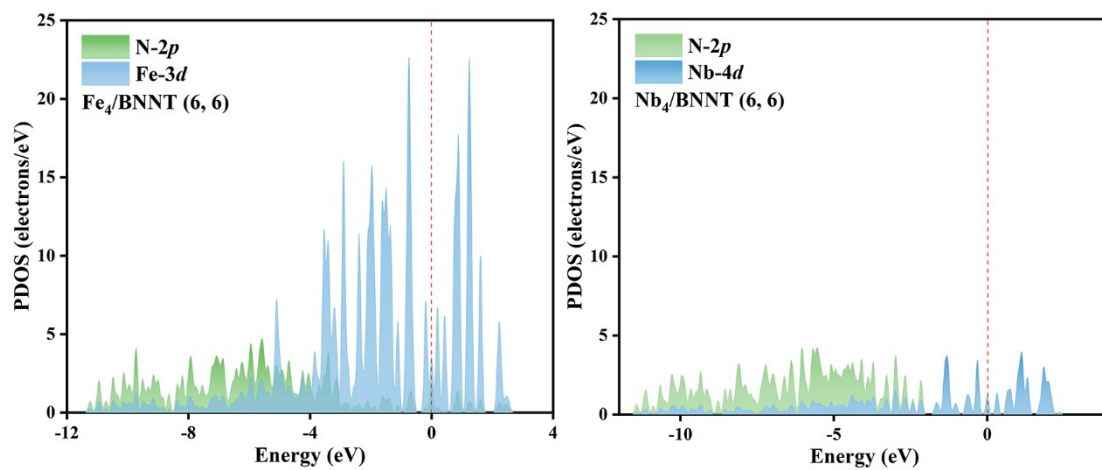

**Fig. S12** Partial density of states (PDOS) of Fe<sub>4</sub>/BNNT (6, 6) and Nb<sub>4</sub>/BNNT (6, 6), including the Fe-3*d* (Nb-4*d*) orbital and adjacent N-2*p* orbital. The fermi energy level is set to zero.

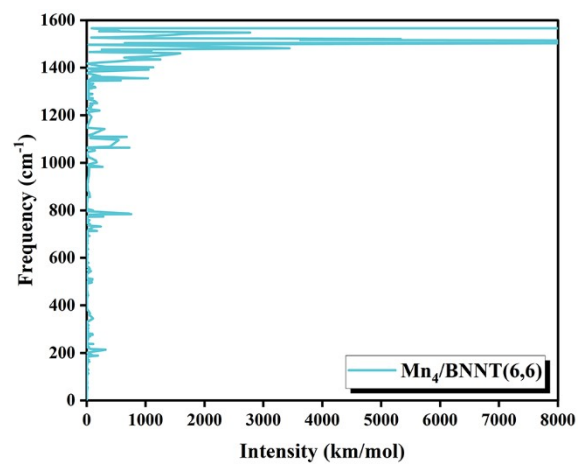

**Fig. S13** Frequency distribution of Mn<sub>4</sub>/BNNT (6, 6) after optimization.

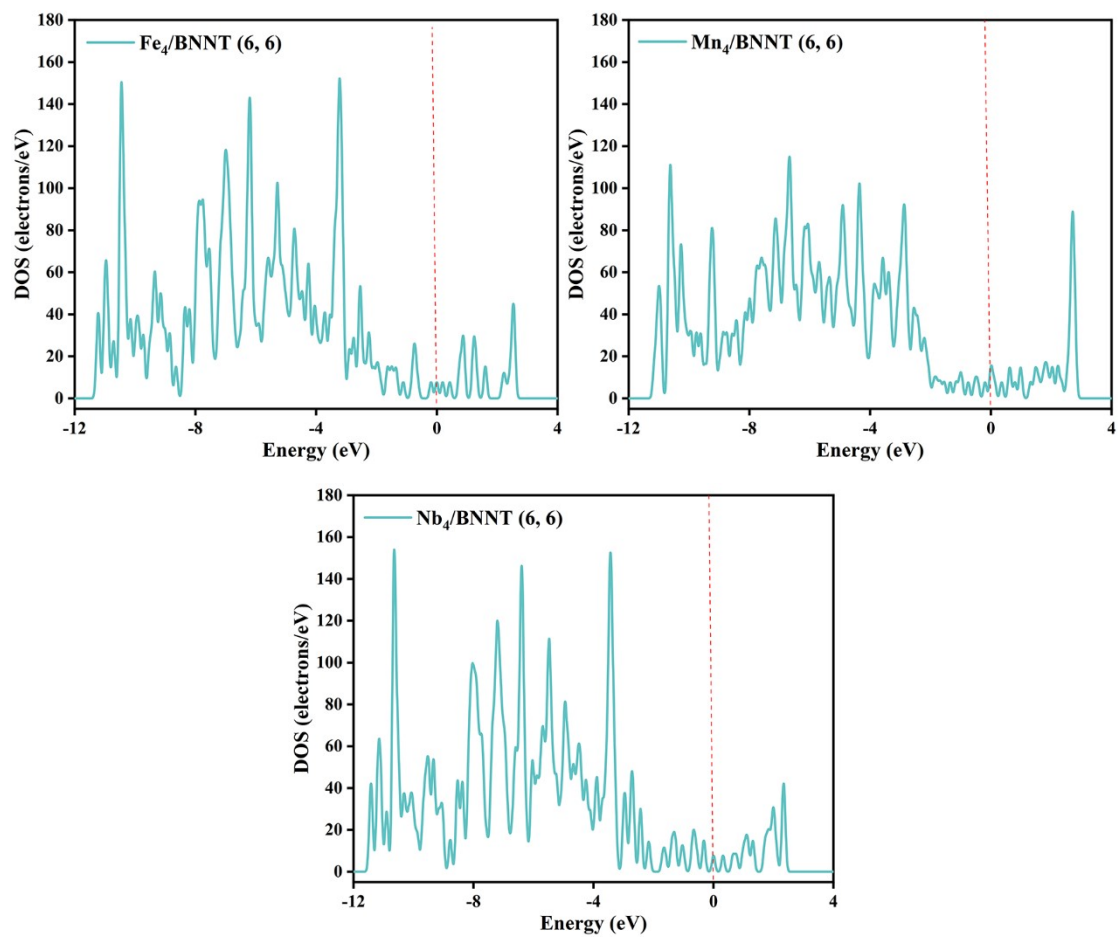

**Fig. S14** Density of states (DOS) of TM<sub>4</sub>/BNNT (6, 6) (TM = Fe, Mn, Nb). The fermi energy level is set to zero, which is the red dashed line.



Table S1 The formation energy of B-vacancy and N-vacancy on BNNT (n, n).

| system        | B-vacancy (eV) | N-vacancy (eV) |
|---------------|----------------|----------------|
| BNNT (5, 5)   | 8.28           | 11.68          |
| BNNT (6, 6)   | 8.34           | 11.89          |
| BNNT (7, 7)   | 8.65           | 11.90          |
| BNNT (8, 8)   | 8.70           | 11.94          |
| BNNT (9, 9)   | 8.80           | 12.02          |
| BNNT (10, 10) | 8.83           | 12.12          |

Table S2 Corresponding  $\Delta G$  of  $^*N_2$  Adsorbed on B or N Sites of  $TM_4/BNNT$  (6, 6)

(TM = Fe, Mn, Nb). \*

| system            | $N_2$  |        | $H^+$  |        |
|-------------------|--------|--------|--------|--------|
|                   | B-site | N-site | B-site | N-site |
| $Fe_4/BNNT$ (6,6) | 1.41   | 0.66   | 2.57   | 2.76   |
| $Mn_4/BNNT$ (6,6) | 1.14   | 0.96   | 2.15   | 3.01   |
| $Nb_4/BNNT$ (6,6) | 0.88   | 1.07   | 1.87   | 3.46   |

\*The values are given in units of eV.

### Note S1. Geometrical coordinates of calculation models

The fractional coordinates of all the models in this manuscript are listed below, including  $\text{TM}_4$  clusters decorated on BNNTs with various tube diameters and  $\text{Mn}_4$  adsorbed on h-BN (0001), as well as the key reaction intermediates adsorbed on  $\text{Mn}_4/\text{BNNT}$  (6, 6). Additionally, the cell parameters and DFT total energy corresponding to each model are also displayed at the beginning, where the cell parameters and energy are given in the unit of angstrom and electron volt, respectively.

(1)  $\text{Mn}_4/\text{BNNT}$  (5, 5) ( $G = -142626.6212$  eV)

1.0

|                |               |               |
|----------------|---------------|---------------|
| 25.1270008087  | 0.0000000000  | 0.0000000000  |
| -12.5635004044 | 21.7606210213 | 0.0000000000  |
| 0.0000000000   | 0.0000000000  | 14.7571001053 |

N B Mn

60 59 4

Direct

|             |             |             |
|-------------|-------------|-------------|
| 0.365630000 | 0.287440000 | 0.072730000 |
| 0.245820000 | 0.357980000 | 0.069040000 |
| 0.328280000 | 0.349830000 | 0.151340000 |
| 0.145680000 | 0.306140000 | 0.153690000 |
| 0.064700000 | 0.213410000 | 0.070710000 |
| 0.069400000 | 0.049960000 | 0.071210000 |
| 0.035350000 | 0.115010000 | 0.154250000 |
| 0.153190000 | 0.043710000 | 0.155200000 |
| 0.254400000 | 0.097330000 | 0.072900000 |
| 0.334180000 | 0.190810000 | 0.156980000 |
| 0.368650000 | 0.291440000 | 0.243110000 |
| 0.246940000 | 0.360680000 | 0.235730000 |
| 0.342470000 | 0.375100000 | 0.308950000 |
| 0.147560000 | 0.305460000 | 0.320630000 |

|             |             |             |
|-------------|-------------|-------------|
| 0.065590000 | 0.213300000 | 0.237470000 |
| 0.068790000 | 0.049290000 | 0.237950000 |
| 0.035020000 | 0.114560000 | 0.320890000 |
| 0.153090000 | 0.043780000 | 0.321970000 |
| 0.253470000 | 0.097950000 | 0.239170000 |
| 0.335260000 | 0.190250000 | 0.322340000 |
| 0.407610000 | 0.288060000 | 0.406640000 |
| 0.249810000 | 0.359130000 | 0.403050000 |
| 0.336630000 | 0.358540000 | 0.492950000 |
| 0.147820000 | 0.304670000 | 0.486350000 |
| 0.065840000 | 0.212960000 | 0.403750000 |
| 0.068660000 | 0.049130000 | 0.404810000 |
| 0.034910000 | 0.114500000 | 0.487640000 |
| 0.153570000 | 0.044210000 | 0.488430000 |
| 0.254330000 | 0.097820000 | 0.405330000 |
| 0.338380000 | 0.187990000 | 0.489230000 |
| 0.371020000 | 0.287230000 | 0.570060000 |
| 0.247260000 | 0.355360000 | 0.570440000 |
| 0.330140000 | 0.347450000 | 0.655320000 |
| 0.146060000 | 0.305170000 | 0.653150000 |
| 0.065130000 | 0.213040000 | 0.570170000 |
| 0.069340000 | 0.049760000 | 0.571570000 |
| 0.035100000 | 0.114850000 | 0.654340000 |
| 0.153980000 | 0.044390000 | 0.655160000 |
| 0.254450000 | 0.096750000 | 0.571850000 |
| 0.337140000 | 0.187810000 | 0.655470000 |
| 0.366570000 | 0.285500000 | 0.738570000 |
| 0.246390000 | 0.355310000 | 0.736640000 |
| 0.329800000 | 0.349100000 | 0.820960000 |
| 0.145290000 | 0.305750000 | 0.819820000 |

|             |             |             |
|-------------|-------------|-------------|
| 0.064280000 | 0.213170000 | 0.736980000 |
| 0.069960000 | 0.050420000 | 0.738180000 |
| 0.035330000 | 0.115170000 | 0.821000000 |
| 0.154280000 | 0.044620000 | 0.821880000 |
| 0.255010000 | 0.096060000 | 0.738760000 |
| 0.337230000 | 0.187680000 | 0.822680000 |
| 0.366040000 | 0.286210000 | 0.905510000 |
| 0.245920000 | 0.356850000 | 0.902830000 |
| 0.329140000 | 0.349860000 | 0.986380000 |
| 0.144980000 | 0.306250000 | 0.986610000 |
| 0.064230000 | 0.213360000 | 0.903840000 |
| 0.070040000 | 0.050550000 | 0.904680000 |
| 0.035440000 | 0.115250000 | 0.987620000 |
| 0.153990000 | 0.044410000 | 0.988590000 |
| 0.255030000 | 0.096200000 | 0.905930000 |
| 0.336520000 | 0.188650000 | 0.989830000 |
| 0.344510000 | 0.331410000 | 0.069480000 |
| 0.179090000 | 0.327070000 | 0.069790000 |
| 0.276360000 | 0.360210000 | 0.152170000 |
| 0.090070000 | 0.246240000 | 0.154010000 |
| 0.041530000 | 0.147480000 | 0.070960000 |
| 0.122900000 | 0.041990000 | 0.071630000 |
| 0.053850000 | 0.068600000 | 0.154540000 |
| 0.219950000 | 0.076220000 | 0.155750000 |
| 0.310290000 | 0.157090000 | 0.073550000 |
| 0.358790000 | 0.256880000 | 0.158450000 |
| 0.350450000 | 0.340170000 | 0.235750000 |
| 0.180230000 | 0.327230000 | 0.236670000 |
| 0.281300000 | 0.368050000 | 0.317370000 |
| 0.091260000 | 0.245990000 | 0.320720000 |

|             |             |             |
|-------------|-------------|-------------|
| 0.041670000 | 0.147250000 | 0.237650000 |
| 0.122420000 | 0.041540000 | 0.238460000 |
| 0.053450000 | 0.068120000 | 0.321300000 |
| 0.219920000 | 0.076500000 | 0.322460000 |
| 0.308580000 | 0.157890000 | 0.239820000 |
| 0.373070000 | 0.257140000 | 0.324390000 |
| 0.182500000 | 0.326200000 | 0.403390000 |
| 0.279830000 | 0.360430000 | 0.487730000 |
| 0.091160000 | 0.245680000 | 0.486830000 |
| 0.041510000 | 0.146910000 | 0.404170000 |
| 0.122480000 | 0.041670000 | 0.405230000 |
| 0.053620000 | 0.068280000 | 0.488090000 |
| 0.220450000 | 0.076210000 | 0.488510000 |
| 0.311580000 | 0.156740000 | 0.405630000 |
| 0.375480000 | 0.255310000 | 0.488610000 |
| 0.350230000 | 0.332760000 | 0.571710000 |
| 0.180760000 | 0.325150000 | 0.570220000 |
| 0.277140000 | 0.356160000 | 0.653920000 |
| 0.089830000 | 0.245840000 | 0.653500000 |
| 0.041320000 | 0.147050000 | 0.570750000 |
| 0.123100000 | 0.042180000 | 0.571830000 |
| 0.054190000 | 0.068890000 | 0.654750000 |
| 0.220780000 | 0.075660000 | 0.655310000 |
| 0.311280000 | 0.155570000 | 0.571850000 |
| 0.361310000 | 0.253850000 | 0.654350000 |
| 0.345900000 | 0.330000000 | 0.738730000 |
| 0.179740000 | 0.325690000 | 0.736610000 |
| 0.276570000 | 0.357470000 | 0.820190000 |
| 0.089250000 | 0.246140000 | 0.820250000 |
| 0.041190000 | 0.147280000 | 0.737470000 |

|             |             |             |
|-------------|-------------|-------------|
| 0.123530000 | 0.042540000 | 0.738500000 |
| 0.054540000 | 0.069300000 | 0.821340000 |
| 0.221090000 | 0.075490000 | 0.822240000 |
| 0.311700000 | 0.155180000 | 0.738940000 |
| 0.360430000 | 0.253560000 | 0.822310000 |
| 0.345580000 | 0.331100000 | 0.904240000 |
| 0.179160000 | 0.326540000 | 0.903140000 |
| 0.276200000 | 0.358670000 | 0.986120000 |
| 0.089280000 | 0.246330000 | 0.987120000 |
| 0.041320000 | 0.147490000 | 0.904210000 |
| 0.123550000 | 0.042580000 | 0.905070000 |
| 0.054360000 | 0.069170000 | 0.987880000 |
| 0.220820000 | 0.075830000 | 0.989180000 |
| 0.311550000 | 0.155420000 | 0.906310000 |
| 0.359950000 | 0.254530000 | 0.989680000 |
| 0.425650000 | 0.434690000 | 0.493660000 |
| 0.479330000 | 0.382180000 | 0.410600000 |
| 0.369350000 | 0.338930000 | 0.393530000 |
| 0.432970000 | 0.445790000 | 0.328140000 |

(2)  $\text{Mn}_4/\text{BNNT} (6, 6) (G = -168642.2704 \text{ eV})$

1.0

|                |               |               |
|----------------|---------------|---------------|
| 26.4829998016  | 0.0000000000  | 0.0000000000  |
| -13.2414999008 | 22.9349505966 | 0.0000000000  |
| 0.0000000000   | 0.0000000000  | 14.7571001053 |

B N Mn

71 72 4

Direct

|             |             |             |
|-------------|-------------|-------------|
| 0.397010000 | 0.333200000 | 0.010040000 |
| 0.357260000 | 0.387150000 | 0.093050000 |
| 0.278810000 | 0.393630000 | 0.010480000 |

|             |             |             |
|-------------|-------------|-------------|
| 0.098710000 | 0.278440000 | 0.011180000 |
| 0.185170000 | 0.354040000 | 0.094400000 |
| 0.043140000 | 0.184530000 | 0.094560000 |
| 0.034080000 | 0.098860000 | 0.011370000 |
| 0.152240000 | 0.038140000 | 0.011770000 |
| 0.074150000 | 0.045100000 | 0.094900000 |
| 0.245890000 | 0.078380000 | 0.095670000 |
| 0.332190000 | 0.154790000 | 0.012980000 |
| 0.387470000 | 0.249280000 | 0.096920000 |
| 0.404380000 | 0.339670000 | 0.177390000 |
| 0.363120000 | 0.392490000 | 0.259600000 |
| 0.279450000 | 0.392620000 | 0.177440000 |
| 0.098830000 | 0.278060000 | 0.177790000 |
| 0.185570000 | 0.353290000 | 0.260980000 |
| 0.042860000 | 0.184320000 | 0.261180000 |
| 0.033710000 | 0.098550000 | 0.178050000 |
| 0.151880000 | 0.037970000 | 0.178680000 |
| 0.073880000 | 0.044940000 | 0.261730000 |
| 0.245880000 | 0.079040000 | 0.262470000 |
| 0.330650000 | 0.156060000 | 0.179460000 |
| 0.395400000 | 0.249370000 | 0.263440000 |
| 0.357460000 | 0.384220000 | 0.428210000 |
| 0.280150000 | 0.391580000 | 0.343850000 |
| 0.098630000 | 0.277940000 | 0.344220000 |
| 0.185230000 | 0.353380000 | 0.427070000 |
| 0.042830000 | 0.184450000 | 0.427870000 |
| 0.033550000 | 0.098520000 | 0.344820000 |
| 0.152030000 | 0.038420000 | 0.345450000 |
| 0.074110000 | 0.045290000 | 0.428510000 |
| 0.246510000 | 0.079270000 | 0.428620000 |

|             |             |             |
|-------------|-------------|-------------|
| 0.333100000 | 0.155470000 | 0.345460000 |
| 0.400100000 | 0.248050000 | 0.427790000 |
| 0.398820000 | 0.331740000 | 0.511510000 |
| 0.354280000 | 0.381990000 | 0.594230000 |
| 0.278140000 | 0.391070000 | 0.510680000 |
| 0.098460000 | 0.278330000 | 0.510800000 |
| 0.184460000 | 0.354400000 | 0.593910000 |
| 0.043030000 | 0.184760000 | 0.594560000 |
| 0.033790000 | 0.098820000 | 0.511560000 |
| 0.152620000 | 0.039070000 | 0.511960000 |
| 0.074640000 | 0.045800000 | 0.595130000 |
| 0.246980000 | 0.078870000 | 0.595140000 |
| 0.333940000 | 0.154640000 | 0.511570000 |
| 0.391610000 | 0.247340000 | 0.594670000 |
| 0.396390000 | 0.330630000 | 0.678610000 |
| 0.355280000 | 0.384200000 | 0.760480000 |
| 0.278050000 | 0.392430000 | 0.677150000 |
| 0.098290000 | 0.278670000 | 0.677620000 |
| 0.184390000 | 0.354930000 | 0.760730000 |
| 0.043230000 | 0.184900000 | 0.761270000 |
| 0.034160000 | 0.099130000 | 0.678190000 |
| 0.152970000 | 0.039180000 | 0.678500000 |
| 0.074910000 | 0.045970000 | 0.761650000 |
| 0.247090000 | 0.078090000 | 0.761960000 |
| 0.334230000 | 0.153600000 | 0.678640000 |
| 0.389940000 | 0.246780000 | 0.762250000 |
| 0.396950000 | 0.332120000 | 0.844330000 |
| 0.356140000 | 0.385860000 | 0.926650000 |
| 0.278380000 | 0.393450000 | 0.843750000 |
| 0.098460000 | 0.278690000 | 0.844440000 |



|             |             |             |
|-------------|-------------|-------------|
| 0.184690000 | 0.354850000 | 0.927590000 |
| 0.043290000 | 0.184800000 | 0.927940000 |
| 0.034290000 | 0.099140000 | 0.844770000 |
| 0.152850000 | 0.038800000 | 0.845080000 |
| 0.074660000 | 0.045620000 | 0.928180000 |
| 0.246650000 | 0.077960000 | 0.928920000 |
| 0.333620000 | 0.153490000 | 0.845930000 |
| 0.388900000 | 0.247480000 | 0.929220000 |
| 0.391920000 | 0.358730000 | 0.092320000 |
| 0.335160000 | 0.396810000 | 0.009960000 |
| 0.152900000 | 0.333970000 | 0.011120000 |
| 0.248490000 | 0.386860000 | 0.094310000 |
| 0.073670000 | 0.247850000 | 0.094420000 |
| 0.032000000 | 0.152660000 | 0.011200000 |
| 0.095860000 | 0.034970000 | 0.011580000 |
| 0.039680000 | 0.073900000 | 0.094700000 |
| 0.182620000 | 0.044140000 | 0.095360000 |
| 0.278230000 | 0.099070000 | 0.012630000 |
| 0.399910000 | 0.280030000 | 0.012180000 |
| 0.356100000 | 0.186070000 | 0.096270000 |
| 0.409420000 | 0.377280000 | 0.253790000 |
| 0.336620000 | 0.397640000 | 0.177060000 |
| 0.153330000 | 0.333240000 | 0.177740000 |
| 0.248940000 | 0.385560000 | 0.260940000 |
| 0.073470000 | 0.247620000 | 0.260970000 |
| 0.031690000 | 0.152380000 | 0.177850000 |
| 0.095390000 | 0.034570000 | 0.178400000 |
| 0.039340000 | 0.073690000 | 0.261490000 |
| 0.182610000 | 0.044560000 | 0.262150000 |
| 0.277420000 | 0.100040000 | 0.179060000 |

|             |             |             |
|-------------|-------------|-------------|
| 0.400790000 | 0.282210000 | 0.180880000 |
| 0.356310000 | 0.186460000 | 0.262120000 |
| 0.393830000 | 0.358960000 | 0.431920000 |
| 0.337680000 | 0.396650000 | 0.343630000 |
| 0.153170000 | 0.333000000 | 0.343930000 |
| 0.248460000 | 0.385160000 | 0.426620000 |
| 0.073330000 | 0.247750000 | 0.427620000 |
| 0.031500000 | 0.152340000 | 0.344600000 |
| 0.095410000 | 0.034740000 | 0.345200000 |
| 0.039420000 | 0.073860000 | 0.428290000 |
| 0.183140000 | 0.045320000 | 0.428590000 |
| 0.278230000 | 0.100310000 | 0.345340000 |
| 0.426350000 | 0.279260000 | 0.344520000 |
| 0.360190000 | 0.184760000 | 0.428510000 |
| 0.388290000 | 0.352950000 | 0.595490000 |
| 0.333200000 | 0.392420000 | 0.510930000 |
| 0.152740000 | 0.333690000 | 0.510400000 |
| 0.247670000 | 0.386690000 | 0.593770000 |
| 0.073320000 | 0.248090000 | 0.594330000 |
| 0.031670000 | 0.152600000 | 0.511360000 |
| 0.096000000 | 0.035400000 | 0.511840000 |
| 0.039850000 | 0.074250000 | 0.594960000 |
| 0.183600000 | 0.045580000 | 0.595140000 |
| 0.278690000 | 0.100000000 | 0.511710000 |
| 0.405840000 | 0.279930000 | 0.511070000 |
| 0.359920000 | 0.183840000 | 0.595310000 |
| 0.390070000 | 0.355750000 | 0.761110000 |
| 0.333440000 | 0.393730000 | 0.677260000 |
| 0.152280000 | 0.334350000 | 0.677390000 |
| 0.247730000 | 0.387550000 | 0.760560000 |

|             |             |             |
|-------------|-------------|-------------|
| 0.073420000 | 0.248230000 | 0.761110000 |
| 0.031970000 | 0.152870000 | 0.678010000 |
| 0.096490000 | 0.035790000 | 0.678390000 |
| 0.040160000 | 0.074450000 | 0.761500000 |
| 0.183690000 | 0.045240000 | 0.761820000 |
| 0.279140000 | 0.098760000 | 0.678570000 |
| 0.401540000 | 0.278560000 | 0.678850000 |
| 0.359470000 | 0.183390000 | 0.762530000 |
| 0.390770000 | 0.357270000 | 0.926760000 |
| 0.334310000 | 0.395640000 | 0.843510000 |
| 0.152480000 | 0.334390000 | 0.844320000 |
| 0.248050000 | 0.387880000 | 0.927360000 |
| 0.073600000 | 0.248130000 | 0.927820000 |
| 0.032110000 | 0.152890000 | 0.844610000 |
| 0.096450000 | 0.035630000 | 0.844930000 |
| 0.040060000 | 0.074270000 | 0.928040000 |
| 0.183270000 | 0.044650000 | 0.928610000 |
| 0.278940000 | 0.098320000 | 0.845690000 |
| 0.400440000 | 0.279030000 | 0.845440000 |
| 0.358260000 | 0.184170000 | 0.929490000 |
| 0.498110000 | 0.416660000 | 0.217080000 |
| 0.553620000 | 0.438690000 | 0.363430000 |
| 0.451400000 | 0.366830000 | 0.351770000 |
| 0.512270000 | 0.331570000 | 0.290250000 |

(3)  $\text{Mn}_4/\text{BNNT} (7, 7) (G = -194655.7682 \text{ eV})$

1.0

|                |               |               |
|----------------|---------------|---------------|
| 27.8390007019  | 0.0000000000  | 0.0000000000  |
| -13.9195003510 | 24.1092818238 | 0.0000000000  |
| 0.0000000000   | 0.0000000000  | 14.7571001053 |

N B Mn

## Direct

|             |             |             |
|-------------|-------------|-------------|
| 0.437870000 | 0.347400000 | 0.033060000 |
| 0.343640000 | 0.429780000 | 0.033370000 |
| 0.408930000 | 0.407110000 | 0.114860000 |
| 0.258290000 | 0.412370000 | 0.117460000 |
| 0.167440000 | 0.363290000 | 0.033970000 |
| 0.034840000 | 0.195250000 | 0.033380000 |
| 0.087400000 | 0.285570000 | 0.116970000 |
| 0.021850000 | 0.110830000 | 0.116740000 |
| 0.051360000 | 0.051120000 | 0.033410000 |
| 0.201170000 | 0.043440000 | 0.033260000 |
| 0.115660000 | 0.027590000 | 0.116680000 |
| 0.291700000 | 0.094180000 | 0.116670000 |
| 0.371090000 | 0.172560000 | 0.033580000 |
| 0.422930000 | 0.263300000 | 0.117000000 |
| 0.440370000 | 0.350030000 | 0.201050000 |
| 0.344130000 | 0.428310000 | 0.200060000 |
| 0.422210000 | 0.424160000 | 0.275880000 |
| 0.259010000 | 0.410290000 | 0.284220000 |
| 0.167960000 | 0.361970000 | 0.200760000 |
| 0.034060000 | 0.194910000 | 0.200060000 |
| 0.087280000 | 0.285140000 | 0.283610000 |
| 0.021620000 | 0.110730000 | 0.283460000 |
| 0.051510000 | 0.051320000 | 0.200110000 |
| 0.200910000 | 0.042870000 | 0.199920000 |
| 0.115580000 | 0.027450000 | 0.283340000 |
| 0.291480000 | 0.094110000 | 0.283310000 |
| 0.369990000 | 0.172990000 | 0.200190000 |
| 0.423550000 | 0.263680000 | 0.283140000 |

|             |             |             |
|-------------|-------------|-------------|
| 0.461040000 | 0.353990000 | 0.366600000 |
| 0.347100000 | 0.430480000 | 0.366970000 |
| 0.423020000 | 0.425460000 | 0.457840000 |
| 0.259090000 | 0.410640000 | 0.449740000 |
| 0.168170000 | 0.361370000 | 0.366970000 |
| 0.033740000 | 0.194760000 | 0.366890000 |
| 0.087370000 | 0.285210000 | 0.450230000 |
| 0.021700000 | 0.110760000 | 0.450190000 |
| 0.051640000 | 0.051440000 | 0.366760000 |
| 0.200760000 | 0.042420000 | 0.366590000 |
| 0.115620000 | 0.027440000 | 0.450020000 |
| 0.291460000 | 0.093990000 | 0.449790000 |
| 0.370020000 | 0.173250000 | 0.366610000 |
| 0.422940000 | 0.263730000 | 0.450100000 |
| 0.439900000 | 0.350230000 | 0.532110000 |
| 0.344510000 | 0.429350000 | 0.533790000 |
| 0.408830000 | 0.407470000 | 0.618720000 |
| 0.258450000 | 0.413050000 | 0.616510000 |
| 0.168060000 | 0.362230000 | 0.533190000 |
| 0.034280000 | 0.194990000 | 0.533670000 |
| 0.087640000 | 0.285680000 | 0.616830000 |
| 0.021980000 | 0.110880000 | 0.616870000 |
| 0.051590000 | 0.051330000 | 0.533400000 |
| 0.200910000 | 0.042740000 | 0.533300000 |
| 0.115730000 | 0.027590000 | 0.616710000 |
| 0.291700000 | 0.094020000 | 0.616480000 |
| 0.369800000 | 0.172980000 | 0.532990000 |
| 0.422290000 | 0.263340000 | 0.616120000 |
| 0.437420000 | 0.347370000 | 0.700130000 |
| 0.343710000 | 0.430250000 | 0.700620000 |

|             |             |             |
|-------------|-------------|-------------|
| 0.407680000 | 0.406690000 | 0.784150000 |
| 0.258160000 | 0.414740000 | 0.783560000 |
| 0.167550000 | 0.363620000 | 0.699980000 |
| 0.035040000 | 0.195330000 | 0.700270000 |
| 0.087800000 | 0.285990000 | 0.783500000 |
| 0.022160000 | 0.110980000 | 0.783490000 |
| 0.051430000 | 0.051140000 | 0.700100000 |
| 0.201180000 | 0.043340000 | 0.700010000 |
| 0.115780000 | 0.027720000 | 0.783380000 |
| 0.292040000 | 0.094260000 | 0.783190000 |
| 0.370990000 | 0.172570000 | 0.699560000 |
| 0.424330000 | 0.262750000 | 0.783090000 |
| 0.437600000 | 0.347140000 | 0.866590000 |
| 0.343580000 | 0.430580000 | 0.867020000 |
| 0.407850000 | 0.406690000 | 0.949480000 |
| 0.258100000 | 0.414430000 | 0.950570000 |
| 0.167340000 | 0.364010000 | 0.866990000 |
| 0.035270000 | 0.195430000 | 0.866800000 |
| 0.087670000 | 0.285930000 | 0.950210000 |
| 0.022100000 | 0.110960000 | 0.950090000 |
| 0.051310000 | 0.051040000 | 0.866760000 |
| 0.201340000 | 0.043760000 | 0.866640000 |
| 0.115750000 | 0.027720000 | 0.950020000 |
| 0.292020000 | 0.094360000 | 0.949990000 |
| 0.371660000 | 0.172200000 | 0.866570000 |
| 0.424520000 | 0.262740000 | 0.949970000 |
| 0.420740000 | 0.388540000 | 0.032070000 |
| 0.287810000 | 0.421320000 | 0.033710000 |
| 0.367520000 | 0.424000000 | 0.115900000 |
| 0.198100000 | 0.381320000 | 0.117340000 |

|             |             |             |
|-------------|-------------|-------------|
| 0.113260000 | 0.313210000 | 0.033750000 |
| 0.023610000 | 0.138330000 | 0.033410000 |
| 0.050100000 | 0.225890000 | 0.116850000 |
| 0.038890000 | 0.069270000 | 0.116730000 |
| 0.092180000 | 0.033100000 | 0.033370000 |
| 0.261450000 | 0.075140000 | 0.033250000 |
| 0.171370000 | 0.035480000 | 0.116590000 |
| 0.345190000 | 0.145050000 | 0.116880000 |
| 0.408090000 | 0.232320000 | 0.033760000 |
| 0.435720000 | 0.320680000 | 0.117700000 |
| 0.426190000 | 0.393750000 | 0.198730000 |
| 0.288120000 | 0.419000000 | 0.200370000 |
| 0.372060000 | 0.428280000 | 0.282480000 |
| 0.198750000 | 0.379920000 | 0.283970000 |
| 0.113350000 | 0.312570000 | 0.200470000 |
| 0.023140000 | 0.138100000 | 0.200080000 |
| 0.049610000 | 0.225550000 | 0.283540000 |
| 0.038940000 | 0.069380000 | 0.283450000 |
| 0.092180000 | 0.033090000 | 0.200050000 |
| 0.261190000 | 0.074860000 | 0.199950000 |
| 0.171180000 | 0.035060000 | 0.283270000 |
| 0.344800000 | 0.145280000 | 0.283500000 |
| 0.406910000 | 0.232710000 | 0.200550000 |
| 0.443950000 | 0.323510000 | 0.284600000 |
| 0.289580000 | 0.418890000 | 0.366990000 |
| 0.372530000 | 0.429150000 | 0.451490000 |
| 0.198810000 | 0.380130000 | 0.449960000 |
| 0.113390000 | 0.312250000 | 0.366900000 |
| 0.022980000 | 0.138010000 | 0.366840000 |
| 0.049730000 | 0.225620000 | 0.450220000 |

|             |             |             |
|-------------|-------------|-------------|
| 0.038990000 | 0.069400000 | 0.450110000 |
| 0.092220000 | 0.033090000 | 0.366710000 |
| 0.261060000 | 0.074580000 | 0.366540000 |
| 0.171200000 | 0.035010000 | 0.449960000 |
| 0.344720000 | 0.145240000 | 0.449650000 |
| 0.407660000 | 0.233170000 | 0.366630000 |
| 0.443510000 | 0.323610000 | 0.448640000 |
| 0.426250000 | 0.394370000 | 0.534700000 |
| 0.288340000 | 0.419720000 | 0.533570000 |
| 0.367690000 | 0.424710000 | 0.617970000 |
| 0.198230000 | 0.381750000 | 0.616610000 |
| 0.113510000 | 0.312710000 | 0.533350000 |
| 0.023290000 | 0.138160000 | 0.533570000 |
| 0.050350000 | 0.225990000 | 0.616860000 |
| 0.038980000 | 0.069290000 | 0.616780000 |
| 0.092250000 | 0.033090000 | 0.533360000 |
| 0.261190000 | 0.074710000 | 0.533190000 |
| 0.171410000 | 0.035410000 | 0.616680000 |
| 0.345110000 | 0.145000000 | 0.616300000 |
| 0.406370000 | 0.232740000 | 0.532630000 |
| 0.435130000 | 0.320720000 | 0.615390000 |
| 0.420460000 | 0.388630000 | 0.701360000 |
| 0.287910000 | 0.421870000 | 0.700340000 |
| 0.367110000 | 0.424860000 | 0.784010000 |
| 0.197860000 | 0.382980000 | 0.783530000 |
| 0.113460000 | 0.313390000 | 0.700050000 |
| 0.023760000 | 0.138390000 | 0.700200000 |
| 0.050800000 | 0.226250000 | 0.783500000 |
| 0.038890000 | 0.069200000 | 0.783440000 |
| 0.092240000 | 0.033100000 | 0.700040000 |



|             |             |             |
|-------------|-------------|-------------|
| 0.261460000 | 0.075000000 | 0.699930000 |
| 0.171590000 | 0.035850000 | 0.783340000 |
| 0.345920000 | 0.144770000 | 0.783070000 |
| 0.407790000 | 0.232360000 | 0.699330000 |
| 0.435730000 | 0.319630000 | 0.783140000 |
| 0.420430000 | 0.388490000 | 0.866730000 |
| 0.287810000 | 0.422460000 | 0.867060000 |
| 0.367140000 | 0.424690000 | 0.949870000 |
| 0.197810000 | 0.382760000 | 0.950520000 |
| 0.113380000 | 0.313600000 | 0.866900000 |
| 0.023890000 | 0.138470000 | 0.866790000 |
| 0.050680000 | 0.226180000 | 0.950150000 |
| 0.038850000 | 0.069200000 | 0.950080000 |
| 0.092200000 | 0.033110000 | 0.866700000 |
| 0.261630000 | 0.075280000 | 0.866600000 |
| 0.171560000 | 0.035870000 | 0.949940000 |
| 0.345930000 | 0.144790000 | 0.950090000 |
| 0.408850000 | 0.231900000 | 0.866540000 |
| 0.435970000 | 0.319650000 | 0.949950000 |
| 0.567710000 | 0.506920000 | 0.360730000 |
| 0.484920000 | 0.510020000 | 0.278250000 |
| 0.472120000 | 0.427310000 | 0.366420000 |
| 0.487220000 | 0.511030000 | 0.452250000 |

(4) Mn<sub>4</sub>/BNNT (8, 8) ( $G = -220669.4141$  eV)

1.0

|                |               |               |
|----------------|---------------|---------------|
| 29.1949996948  | 0.0000000000  | 0.0000000000  |
| -14.5974998474 | 25.2836113992 | 0.0000000000  |
| 0.0000000000   | 0.0000000000  | 14.7571001053 |

|    |    |    |
|----|----|----|
| N  | B  | Mn |
| 96 | 95 | 4  |

Direct

|             |             |             |
|-------------|-------------|-------------|
| 0.460610000 | 0.407930000 | 0.054750000 |
| 0.419870000 | 0.453400000 | 0.136520000 |
| 0.350840000 | 0.464720000 | 0.054660000 |
| 0.181100000 | 0.392080000 | 0.055240000 |
| 0.267570000 | 0.441480000 | 0.138750000 |
| 0.103810000 | 0.319140000 | 0.138330000 |
| 0.046900000 | 0.234200000 | 0.054820000 |
| 0.026340000 | 0.077740000 | 0.054890000 |
| 0.019580000 | 0.149220000 | 0.138150000 |
| 0.066940000 | 0.031730000 | 0.138250000 |
| 0.134360000 | 0.018260000 | 0.054880000 |
| 0.303950000 | 0.091060000 | 0.054840000 |
| 0.217740000 | 0.039310000 | 0.138160000 |
| 0.379790000 | 0.165080000 | 0.138300000 |
| 0.436220000 | 0.250450000 | 0.055160000 |
| 0.463980000 | 0.335610000 | 0.138620000 |
| 0.462910000 | 0.410850000 | 0.222760000 |
| 0.431960000 | 0.471800000 | 0.297170000 |
| 0.351690000 | 0.463940000 | 0.221450000 |
| 0.181710000 | 0.390650000 | 0.222040000 |
| 0.268420000 | 0.439390000 | 0.305520000 |
| 0.103680000 | 0.318760000 | 0.304960000 |
| 0.046370000 | 0.233980000 | 0.221480000 |
| 0.026300000 | 0.077740000 | 0.221560000 |
| 0.019250000 | 0.149080000 | 0.304860000 |
| 0.067020000 | 0.031840000 | 0.304910000 |
| 0.134370000 | 0.018240000 | 0.221550000 |
| 0.303860000 | 0.090760000 | 0.221530000 |
| 0.217680000 | 0.039060000 | 0.304860000 |

|             |             |             |
|-------------|-------------|-------------|
| 0.379520000 | 0.165090000 | 0.304970000 |
| 0.434850000 | 0.250420000 | 0.221760000 |
| 0.465090000 | 0.336170000 | 0.304710000 |
| 0.483790000 | 0.418530000 | 0.388210000 |
| 0.432090000 | 0.472190000 | 0.479430000 |
| 0.354470000 | 0.466220000 | 0.388270000 |
| 0.181940000 | 0.389880000 | 0.388260000 |
| 0.268420000 | 0.439440000 | 0.471020000 |
| 0.103670000 | 0.318770000 | 0.471560000 |
| 0.046090000 | 0.233870000 | 0.388250000 |
| 0.026270000 | 0.077750000 | 0.388240000 |
| 0.019250000 | 0.149080000 | 0.471630000 |
| 0.067020000 | 0.031840000 | 0.471550000 |
| 0.134370000 | 0.018220000 | 0.388220000 |
| 0.303820000 | 0.090560000 | 0.388200000 |
| 0.217670000 | 0.039050000 | 0.471570000 |
| 0.379510000 | 0.165080000 | 0.471430000 |
| 0.435160000 | 0.250690000 | 0.388200000 |
| 0.464940000 | 0.336140000 | 0.471700000 |
| 0.462680000 | 0.410810000 | 0.553590000 |
| 0.419810000 | 0.453480000 | 0.639970000 |
| 0.351720000 | 0.464160000 | 0.555090000 |
| 0.181710000 | 0.390680000 | 0.554480000 |
| 0.267570000 | 0.441560000 | 0.637790000 |
| 0.103810000 | 0.319150000 | 0.638190000 |
| 0.046370000 | 0.233980000 | 0.555030000 |
| 0.026290000 | 0.077740000 | 0.554920000 |
| 0.019580000 | 0.149220000 | 0.638340000 |
| 0.066950000 | 0.031740000 | 0.638210000 |
| 0.134370000 | 0.018240000 | 0.554900000 |

|             |             |             |
|-------------|-------------|-------------|
| 0.303860000 | 0.090740000 | 0.554880000 |
| 0.217740000 | 0.039300000 | 0.638270000 |
| 0.379770000 | 0.165060000 | 0.638100000 |
| 0.434760000 | 0.250410000 | 0.554640000 |
| 0.463760000 | 0.335570000 | 0.637760000 |
| 0.460480000 | 0.407900000 | 0.721640000 |
| 0.418760000 | 0.452700000 | 0.805520000 |
| 0.350860000 | 0.464870000 | 0.721900000 |
| 0.181100000 | 0.392100000 | 0.721300000 |
| 0.267210000 | 0.443550000 | 0.804780000 |
| 0.103900000 | 0.319460000 | 0.804900000 |
| 0.046900000 | 0.234210000 | 0.721680000 |
| 0.026340000 | 0.077740000 | 0.721580000 |
| 0.019900000 | 0.149370000 | 0.804950000 |
| 0.066870000 | 0.031630000 | 0.804890000 |
| 0.134360000 | 0.018260000 | 0.721560000 |
| 0.303940000 | 0.091040000 | 0.721580000 |
| 0.217800000 | 0.039540000 | 0.804920000 |
| 0.380210000 | 0.165170000 | 0.804800000 |
| 0.436150000 | 0.250440000 | 0.721220000 |
| 0.465930000 | 0.335620000 | 0.804750000 |
| 0.460640000 | 0.407780000 | 0.888190000 |
| 0.418770000 | 0.452670000 | 0.970970000 |
| 0.350730000 | 0.465390000 | 0.888280000 |
| 0.180890000 | 0.392670000 | 0.888270000 |
| 0.267210000 | 0.443500000 | 0.971780000 |
| 0.103900000 | 0.319450000 | 0.971610000 |
| 0.047150000 | 0.234300000 | 0.888250000 |
| 0.026370000 | 0.077740000 | 0.888240000 |
| 0.019900000 | 0.149370000 | 0.971530000 |

|             |             |             |
|-------------|-------------|-------------|
| 0.066860000 | 0.031620000 | 0.971570000 |
| 0.134350000 | 0.018270000 | 0.888220000 |
| 0.304000000 | 0.091270000 | 0.888210000 |
| 0.217800000 | 0.039540000 | 0.971520000 |
| 0.380220000 | 0.165180000 | 0.971600000 |
| 0.437120000 | 0.250360000 | 0.888190000 |
| 0.466000000 | 0.335630000 | 0.971610000 |
| 0.435010000 | 0.439370000 | 0.053730000 |
| 0.464140000 | 0.385440000 | 0.139430000 |
| 0.375650000 | 0.462690000 | 0.137310000 |
| 0.296060000 | 0.452100000 | 0.054950000 |
| 0.128980000 | 0.344940000 | 0.055080000 |
| 0.210260000 | 0.409810000 | 0.138600000 |
| 0.064340000 | 0.263200000 | 0.138250000 |
| 0.026830000 | 0.177530000 | 0.054850000 |
| 0.051290000 | 0.045340000 | 0.054900000 |
| 0.021930000 | 0.100660000 | 0.138200000 |
| 0.110290000 | 0.020700000 | 0.138230000 |
| 0.189030000 | 0.030150000 | 0.054850000 |
| 0.355370000 | 0.139120000 | 0.054880000 |
| 0.275090000 | 0.071850000 | 0.138160000 |
| 0.418160000 | 0.221330000 | 0.138460000 |
| 0.457170000 | 0.307300000 | 0.055410000 |
| 0.440520000 | 0.445680000 | 0.220330000 |
| 0.472590000 | 0.389730000 | 0.306150000 |
| 0.380220000 | 0.468030000 | 0.303760000 |
| 0.296620000 | 0.449970000 | 0.221680000 |
| 0.129130000 | 0.344290000 | 0.221810000 |
| 0.210980000 | 0.408280000 | 0.305250000 |
| 0.063950000 | 0.262960000 | 0.304920000 |

|             |             |             |
|-------------|-------------|-------------|
| 0.026390000 | 0.177330000 | 0.221510000 |
| 0.051340000 | 0.045430000 | 0.221570000 |
| 0.021800000 | 0.100610000 | 0.304890000 |
| 0.110320000 | 0.020730000 | 0.304900000 |
| 0.188980000 | 0.029970000 | 0.221520000 |
| 0.355110000 | 0.139010000 | 0.221620000 |
| 0.275020000 | 0.071570000 | 0.304860000 |
| 0.417750000 | 0.221440000 | 0.305130000 |
| 0.455920000 | 0.307260000 | 0.222100000 |
| 0.472450000 | 0.389680000 | 0.470220000 |
| 0.380250000 | 0.468230000 | 0.472890000 |
| 0.298000000 | 0.449700000 | 0.388270000 |
| 0.129150000 | 0.343920000 | 0.388260000 |
| 0.210970000 | 0.408300000 | 0.471270000 |
| 0.063950000 | 0.262960000 | 0.471590000 |
| 0.026160000 | 0.177220000 | 0.388250000 |
| 0.051370000 | 0.045480000 | 0.388230000 |
| 0.021790000 | 0.100610000 | 0.471600000 |
| 0.110320000 | 0.020730000 | 0.471560000 |
| 0.188950000 | 0.029870000 | 0.388220000 |
| 0.355010000 | 0.138900000 | 0.388200000 |
| 0.275020000 | 0.071570000 | 0.471560000 |
| 0.417720000 | 0.221430000 | 0.471260000 |
| 0.457130000 | 0.307910000 | 0.388200000 |
| 0.440420000 | 0.445740000 | 0.556110000 |
| 0.463920000 | 0.385390000 | 0.636900000 |
| 0.375670000 | 0.462860000 | 0.639250000 |
| 0.296610000 | 0.450090000 | 0.554860000 |
| 0.129130000 | 0.344300000 | 0.554710000 |
| 0.210250000 | 0.409850000 | 0.637930000 |

|             |             |             |
|-------------|-------------|-------------|
| 0.064340000 | 0.263210000 | 0.638260000 |
| 0.026390000 | 0.177330000 | 0.554990000 |
| 0.051340000 | 0.045430000 | 0.554890000 |
| 0.021930000 | 0.100660000 | 0.638280000 |
| 0.110290000 | 0.020700000 | 0.638220000 |
| 0.188980000 | 0.029960000 | 0.554910000 |
| 0.355100000 | 0.138990000 | 0.554780000 |
| 0.275090000 | 0.071830000 | 0.638260000 |
| 0.418100000 | 0.221320000 | 0.637940000 |
| 0.455760000 | 0.307220000 | 0.554290000 |
| 0.434940000 | 0.439390000 | 0.722720000 |
| 0.464610000 | 0.384620000 | 0.804730000 |
| 0.375090000 | 0.463030000 | 0.805330000 |
| 0.296060000 | 0.452200000 | 0.721610000 |
| 0.128980000 | 0.344950000 | 0.721440000 |
| 0.209840000 | 0.411270000 | 0.804800000 |
| 0.064690000 | 0.263410000 | 0.804930000 |
| 0.026820000 | 0.177530000 | 0.721640000 |
| 0.051290000 | 0.045340000 | 0.721560000 |
| 0.022060000 | 0.100700000 | 0.804930000 |
| 0.110260000 | 0.020660000 | 0.804890000 |
| 0.189030000 | 0.030150000 | 0.721580000 |
| 0.355360000 | 0.139100000 | 0.721530000 |
| 0.275140000 | 0.072100000 | 0.804920000 |
| 0.419180000 | 0.221330000 | 0.804700000 |
| 0.457050000 | 0.307280000 | 0.720960000 |
| 0.434920000 | 0.439350000 | 0.888220000 |
| 0.464680000 | 0.384630000 | 0.971620000 |
| 0.375090000 | 0.462970000 | 0.971210000 |
| 0.295970000 | 0.453090000 | 0.888280000 |

|             |             |             |
|-------------|-------------|-------------|
| 0.128940000 | 0.345230000 | 0.888260000 |
| 0.209840000 | 0.411250000 | 0.971750000 |
| 0.064690000 | 0.263410000 | 0.971580000 |
| 0.027030000 | 0.177620000 | 0.888250000 |
| 0.051260000 | 0.045290000 | 0.888230000 |
| 0.022060000 | 0.100710000 | 0.971550000 |
| 0.110260000 | 0.020660000 | 0.971560000 |
| 0.189040000 | 0.030240000 | 0.888220000 |
| 0.355530000 | 0.139220000 | 0.888210000 |
| 0.275140000 | 0.072110000 | 0.971510000 |
| 0.419210000 | 0.221330000 | 0.971690000 |
| 0.458320000 | 0.307220000 | 0.888180000 |
| 0.483600000 | 0.556760000 | 0.475260000 |
| 0.482470000 | 0.556500000 | 0.301090000 |
| 0.567760000 | 0.566110000 | 0.385260000 |
| 0.482280000 | 0.482820000 | 0.388270000 |

(5) Mn<sub>4</sub>/BNNT (9, 9) ( $G = -246682.8678$  eV)

1.0

|                |               |               |
|----------------|---------------|---------------|
| 30.5510005951  | 0.0000000000  | 0.0000000000  |
| -15.2755002975 | 26.4579426264 | 0.0000000000  |
| 0.0000000000   | 0.0000000000  | 14.7571001053 |

B N Mn

107 108 4

Direct

|             |             |             |
|-------------|-------------|-------------|
| 0.498170000 | 0.376290000 | 0.077300000 |
| 0.482560000 | 0.438140000 | 0.159420000 |
| 0.438860000 | 0.476690000 | 0.076650000 |
| 0.295240000 | 0.470470000 | 0.077150000 |
| 0.373470000 | 0.486820000 | 0.160320000 |
| 0.212750000 | 0.428910000 | 0.160540000 |



|             |             |             |
|-------------|-------------|-------------|
| 0.134400000 | 0.367880000 | 0.077070000 |
| 0.025950000 | 0.209320000 | 0.077060000 |
| 0.069230000 | 0.291600000 | 0.160360000 |
| 0.010630000 | 0.131670000 | 0.160420000 |
| 0.025760000 | 0.069220000 | 0.077120000 |
| 0.133700000 | 0.018600000 | 0.077130000 |
| 0.068750000 | 0.029920000 | 0.160470000 |
| 0.212030000 | 0.035620000 | 0.160430000 |
| 0.294510000 | 0.077750000 | 0.077120000 |
| 0.437440000 | 0.216360000 | 0.077400000 |
| 0.372350000 | 0.139910000 | 0.160550000 |
| 0.481040000 | 0.298790000 | 0.161160000 |
| 0.498230000 | 0.377490000 | 0.245160000 |
| 0.489340000 | 0.444440000 | 0.326040000 |
| 0.439410000 | 0.476600000 | 0.242770000 |
| 0.295160000 | 0.468700000 | 0.243980000 |
| 0.373530000 | 0.484920000 | 0.327050000 |
| 0.212800000 | 0.427880000 | 0.327280000 |
| 0.134240000 | 0.367670000 | 0.243770000 |
| 0.025770000 | 0.209280000 | 0.243690000 |
| 0.068870000 | 0.291530000 | 0.327010000 |
| 0.010610000 | 0.131700000 | 0.327080000 |
| 0.025840000 | 0.069290000 | 0.243800000 |
| 0.133670000 | 0.018480000 | 0.243790000 |
| 0.068830000 | 0.029980000 | 0.327140000 |
| 0.211950000 | 0.035310000 | 0.327110000 |
| 0.294420000 | 0.077470000 | 0.243790000 |
| 0.436410000 | 0.216560000 | 0.244170000 |
| 0.372060000 | 0.139900000 | 0.327290000 |
| 0.480080000 | 0.298990000 | 0.327740000 |

|             |             |             |
|-------------|-------------|-------------|
| 0.506880000 | 0.380790000 | 0.411690000 |
| 0.445010000 | 0.482090000 | 0.408960000 |
| 0.295350000 | 0.466900000 | 0.410660000 |
| 0.374780000 | 0.484720000 | 0.493640000 |
| 0.212770000 | 0.427370000 | 0.493700000 |
| 0.134020000 | 0.367450000 | 0.410410000 |
| 0.025580000 | 0.209250000 | 0.410380000 |
| 0.068670000 | 0.291500000 | 0.493730000 |
| 0.010610000 | 0.131720000 | 0.493760000 |
| 0.025920000 | 0.069380000 | 0.410450000 |
| 0.133670000 | 0.018410000 | 0.410470000 |
| 0.068890000 | 0.030040000 | 0.493790000 |
| 0.211930000 | 0.035210000 | 0.493830000 |
| 0.294350000 | 0.077220000 | 0.410490000 |
| 0.436090000 | 0.216750000 | 0.410780000 |
| 0.371990000 | 0.139850000 | 0.493840000 |
| 0.481330000 | 0.299490000 | 0.493830000 |
| 0.506920000 | 0.380670000 | 0.576030000 |
| 0.489080000 | 0.443920000 | 0.661600000 |
| 0.444670000 | 0.481680000 | 0.578190000 |
| 0.295340000 | 0.466910000 | 0.576710000 |
| 0.373470000 | 0.484840000 | 0.660320000 |
| 0.212790000 | 0.427910000 | 0.660130000 |
| 0.134010000 | 0.367460000 | 0.577030000 |
| 0.025570000 | 0.209250000 | 0.577110000 |
| 0.068850000 | 0.291540000 | 0.660450000 |
| 0.010620000 | 0.131710000 | 0.660440000 |
| 0.025940000 | 0.069400000 | 0.577100000 |
| 0.133700000 | 0.018470000 | 0.577150000 |
| 0.068870000 | 0.030050000 | 0.660440000 |

|             |             |             |
|-------------|-------------|-------------|
| 0.211990000 | 0.035420000 | 0.660530000 |
| 0.294370000 | 0.077250000 | 0.577190000 |
| 0.436220000 | 0.216720000 | 0.576910000 |
| 0.372140000 | 0.139900000 | 0.660400000 |
| 0.480350000 | 0.298930000 | 0.660000000 |
| 0.498360000 | 0.377360000 | 0.742640000 |
| 0.482640000 | 0.438100000 | 0.828170000 |
| 0.439270000 | 0.476340000 | 0.744620000 |
| 0.295150000 | 0.468730000 | 0.743410000 |
| 0.373450000 | 0.486780000 | 0.827050000 |
| 0.212740000 | 0.428930000 | 0.826860000 |
| 0.134220000 | 0.367690000 | 0.743670000 |
| 0.025750000 | 0.209290000 | 0.743800000 |
| 0.069210000 | 0.291610000 | 0.827110000 |
| 0.010630000 | 0.131680000 | 0.827110000 |
| 0.025860000 | 0.069330000 | 0.743760000 |
| 0.133730000 | 0.018600000 | 0.743820000 |
| 0.068790000 | 0.029990000 | 0.827110000 |
| 0.212070000 | 0.035730000 | 0.827200000 |
| 0.294460000 | 0.077540000 | 0.743880000 |
| 0.436630000 | 0.216500000 | 0.743570000 |
| 0.372430000 | 0.139900000 | 0.827150000 |
| 0.481280000 | 0.298750000 | 0.826640000 |
| 0.498250000 | 0.376270000 | 0.910430000 |
| 0.482610000 | 0.438170000 | 0.993780000 |
| 0.438860000 | 0.476660000 | 0.910750000 |
| 0.295230000 | 0.470490000 | 0.910240000 |
| 0.373660000 | 0.487840000 | 0.993680000 |
| 0.212740000 | 0.429380000 | 0.993710000 |
| 0.134390000 | 0.367890000 | 0.910370000 |

|             |             |             |
|-------------|-------------|-------------|
| 0.025940000 | 0.209320000 | 0.910440000 |
| 0.069390000 | 0.291640000 | 0.993730000 |
| 0.010630000 | 0.131660000 | 0.993760000 |
| 0.025780000 | 0.069240000 | 0.910430000 |
| 0.133730000 | 0.018660000 | 0.910470000 |
| 0.068730000 | 0.029920000 | 0.993790000 |
| 0.212080000 | 0.035820000 | 0.993810000 |
| 0.294530000 | 0.077790000 | 0.910530000 |
| 0.437540000 | 0.216330000 | 0.910360000 |
| 0.372590000 | 0.139950000 | 0.993850000 |
| 0.482080000 | 0.298480000 | 0.993900000 |
| 0.498050000 | 0.400630000 | 0.160430000 |
| 0.471730000 | 0.455240000 | 0.076540000 |
| 0.348670000 | 0.486150000 | 0.077150000 |
| 0.419830000 | 0.484730000 | 0.160040000 |
| 0.267560000 | 0.459600000 | 0.160670000 |
| 0.185090000 | 0.411620000 | 0.077100000 |
| 0.050800000 | 0.264140000 | 0.077020000 |
| 0.109630000 | 0.344040000 | 0.160340000 |
| 0.015890000 | 0.181630000 | 0.160380000 |
| 0.010940000 | 0.107580000 | 0.077100000 |
| 0.087550000 | 0.021330000 | 0.077120000 |
| 0.036210000 | 0.051950000 | 0.160470000 |
| 0.158600000 | 0.019960000 | 0.160440000 |
| 0.239770000 | 0.046230000 | 0.077120000 |
| 0.397030000 | 0.163870000 | 0.077280000 |
| 0.322020000 | 0.095630000 | 0.160490000 |
| 0.455510000 | 0.243910000 | 0.160870000 |
| 0.492330000 | 0.326220000 | 0.077300000 |
| 0.501970000 | 0.404190000 | 0.328450000 |

|             |             |             |
|-------------|-------------|-------------|
| 0.472740000 | 0.455790000 | 0.242260000 |
| 0.348420000 | 0.484030000 | 0.244080000 |
| 0.420750000 | 0.484580000 | 0.326740000 |
| 0.267640000 | 0.457660000 | 0.327490000 |
| 0.185100000 | 0.411070000 | 0.243860000 |
| 0.050500000 | 0.264100000 | 0.243630000 |
| 0.109320000 | 0.343930000 | 0.326990000 |
| 0.015750000 | 0.181610000 | 0.327050000 |
| 0.010980000 | 0.107630000 | 0.243770000 |
| 0.087590000 | 0.021340000 | 0.243800000 |
| 0.036320000 | 0.052050000 | 0.327130000 |
| 0.158540000 | 0.019770000 | 0.327110000 |
| 0.239690000 | 0.045880000 | 0.243770000 |
| 0.396520000 | 0.163920000 | 0.243980000 |
| 0.321900000 | 0.095370000 | 0.327180000 |
| 0.454280000 | 0.244110000 | 0.327410000 |
| 0.490830000 | 0.326670000 | 0.244320000 |
| 0.521450000 | 0.408410000 | 0.493950000 |
| 0.488250000 | 0.474120000 | 0.402340000 |
| 0.348670000 | 0.482030000 | 0.410890000 |
| 0.423760000 | 0.486660000 | 0.493590000 |
| 0.267600000 | 0.456690000 | 0.493690000 |
| 0.185030000 | 0.410480000 | 0.410450000 |
| 0.050180000 | 0.264060000 | 0.410350000 |
| 0.109140000 | 0.343880000 | 0.493720000 |
| 0.015670000 | 0.181600000 | 0.493750000 |
| 0.011020000 | 0.107680000 | 0.410430000 |
| 0.087650000 | 0.021390000 | 0.410460000 |
| 0.036400000 | 0.052130000 | 0.493780000 |
| 0.158540000 | 0.019720000 | 0.493810000 |

|             |             |             |
|-------------|-------------|-------------|
| 0.239610000 | 0.045580000 | 0.410470000 |
| 0.396280000 | 0.164000000 | 0.410610000 |
| 0.321880000 | 0.095230000 | 0.493830000 |
| 0.454680000 | 0.244330000 | 0.493830000 |
| 0.491920000 | 0.327090000 | 0.410340000 |
| 0.501860000 | 0.403890000 | 0.659350000 |
| 0.487560000 | 0.473140000 | 0.584910000 |
| 0.348660000 | 0.482010000 | 0.576450000 |
| 0.420610000 | 0.484320000 | 0.660610000 |
| 0.267630000 | 0.457680000 | 0.659890000 |
| 0.185030000 | 0.410490000 | 0.576960000 |
| 0.050170000 | 0.264070000 | 0.577120000 |
| 0.109300000 | 0.343940000 | 0.660450000 |
| 0.015740000 | 0.181620000 | 0.660450000 |
| 0.011020000 | 0.107700000 | 0.577090000 |
| 0.087680000 | 0.021430000 | 0.577130000 |
| 0.036360000 | 0.052100000 | 0.660420000 |
| 0.158590000 | 0.019880000 | 0.660510000 |
| 0.239630000 | 0.045640000 | 0.577180000 |
| 0.396350000 | 0.163980000 | 0.577060000 |
| 0.321950000 | 0.095410000 | 0.660490000 |
| 0.454520000 | 0.244040000 | 0.660300000 |
| 0.492050000 | 0.327000000 | 0.577390000 |
| 0.498120000 | 0.400570000 | 0.827270000 |
| 0.472690000 | 0.455620000 | 0.745250000 |
| 0.348400000 | 0.484010000 | 0.743290000 |
| 0.419780000 | 0.484590000 | 0.827310000 |
| 0.267550000 | 0.459630000 | 0.826720000 |
| 0.185080000 | 0.411090000 | 0.743550000 |
| 0.050470000 | 0.264110000 | 0.743840000 |

|             |             |             |
|-------------|-------------|-------------|
| 0.109610000 | 0.344060000 | 0.827100000 |
| 0.015880000 | 0.181630000 | 0.827120000 |
| 0.010990000 | 0.107650000 | 0.743750000 |
| 0.087640000 | 0.021430000 | 0.743790000 |
| 0.036240000 | 0.051990000 | 0.827090000 |
| 0.158640000 | 0.020070000 | 0.827170000 |
| 0.239730000 | 0.045990000 | 0.743880000 |
| 0.396650000 | 0.163870000 | 0.743720000 |
| 0.322070000 | 0.095660000 | 0.827190000 |
| 0.455730000 | 0.243840000 | 0.826900000 |
| 0.491100000 | 0.326590000 | 0.743460000 |
| 0.498090000 | 0.400420000 | 0.993830000 |
| 0.471760000 | 0.455220000 | 0.910960000 |
| 0.348670000 | 0.486150000 | 0.910210000 |
| 0.419900000 | 0.485360000 | 0.993670000 |
| 0.267560000 | 0.460450000 | 0.993690000 |
| 0.185090000 | 0.411630000 | 0.910320000 |
| 0.050790000 | 0.264150000 | 0.910450000 |
| 0.109760000 | 0.344100000 | 0.993720000 |
| 0.015960000 | 0.181640000 | 0.993750000 |
| 0.010950000 | 0.107600000 | 0.910430000 |
| 0.087580000 | 0.021380000 | 0.910450000 |
| 0.036170000 | 0.051920000 | 0.993780000 |
| 0.158640000 | 0.020110000 | 0.993800000 |
| 0.239790000 | 0.046280000 | 0.910520000 |
| 0.397090000 | 0.163850000 | 0.910450000 |
| 0.322130000 | 0.095820000 | 0.993840000 |
| 0.456460000 | 0.243620000 | 0.993890000 |
| 0.492440000 | 0.326200000 | 0.910470000 |
| 0.546620000 | 0.550660000 | 0.584110000 |

|             |             |             |
|-------------|-------------|-------------|
| 0.532260000 | 0.475130000 | 0.493810000 |
| 0.550500000 | 0.552440000 | 0.408260000 |
| 0.620910000 | 0.544830000 | 0.505570000 |

(6) Mn<sub>4</sub>/BNNT (10, 10) ( $G = -272696.0826$  eV)

1.0

|                |               |               |
|----------------|---------------|---------------|
| 31.9069995880  | 0.0000000000  | 0.0000000000  |
| -15.9534997940 | 27.6322722018 | 0.0000000000  |
| 0.0000000000   | 0.0000000000  | 14.7571001053 |

N B Mn

120 119 4

Direct

|             |             |             |
|-------------|-------------|-------------|
| 0.513810000 | 0.449470000 | 0.015770000 |
| 0.477230000 | 0.491690000 | 0.099220000 |
| 0.420560000 | 0.511600000 | 0.016280000 |
| 0.271530000 | 0.480060000 | 0.016270000 |
| 0.349440000 | 0.506110000 | 0.099790000 |
| 0.192430000 | 0.434060000 | 0.099530000 |
| 0.119300000 | 0.371040000 | 0.016190000 |
| 0.020570000 | 0.216720000 | 0.016250000 |
| 0.059430000 | 0.296000000 | 0.099520000 |
| 0.005730000 | 0.141860000 | 0.099630000 |
| 0.015900000 | 0.078800000 | 0.016310000 |
| 0.106880000 | 0.014120000 | 0.016330000 |
| 0.050650000 | 0.034450000 | 0.099660000 |
| 0.177900000 | 0.019080000 | 0.099650000 |
| 0.256250000 | 0.047590000 | 0.016340000 |
| 0.407910000 | 0.159000000 | 0.016510000 |
| 0.334950000 | 0.095290000 | 0.099730000 |
| 0.468030000 | 0.233860000 | 0.100110000 |
| 0.510290000 | 0.312720000 | 0.016550000 |



|             |             |             |
|-------------|-------------|-------------|
| 0.526030000 | 0.387930000 | 0.099720000 |
| 0.514890000 | 0.449980000 | 0.181650000 |
| 0.478180000 | 0.491690000 | 0.265950000 |
| 0.419830000 | 0.509470000 | 0.183210000 |
| 0.271390000 | 0.479260000 | 0.183040000 |
| 0.349020000 | 0.504080000 | 0.266630000 |
| 0.192240000 | 0.433880000 | 0.266180000 |
| 0.119080000 | 0.371060000 | 0.182810000 |
| 0.020510000 | 0.216730000 | 0.182920000 |
| 0.059220000 | 0.296020000 | 0.266190000 |
| 0.005760000 | 0.141900000 | 0.266290000 |
| 0.015960000 | 0.078850000 | 0.182990000 |
| 0.106870000 | 0.014070000 | 0.182990000 |
| 0.050690000 | 0.034470000 | 0.266330000 |
| 0.177820000 | 0.018860000 | 0.266320000 |
| 0.256160000 | 0.047290000 | 0.183000000 |
| 0.407380000 | 0.159160000 | 0.183230000 |
| 0.334790000 | 0.095160000 | 0.266430000 |
| 0.466790000 | 0.234290000 | 0.266660000 |
| 0.508780000 | 0.313380000 | 0.183570000 |
| 0.530500000 | 0.391210000 | 0.267770000 |
| 0.532400000 | 0.466610000 | 0.341530000 |
| 0.481680000 | 0.493930000 | 0.432730000 |
| 0.419740000 | 0.507720000 | 0.350030000 |
| 0.271190000 | 0.478430000 | 0.349610000 |
| 0.348730000 | 0.503010000 | 0.432830000 |
| 0.192130000 | 0.433790000 | 0.432870000 |
| 0.118860000 | 0.371090000 | 0.349510000 |
| 0.020450000 | 0.216740000 | 0.349590000 |
| 0.059120000 | 0.296030000 | 0.432910000 |

|             |             |             |
|-------------|-------------|-------------|
| 0.005780000 | 0.141910000 | 0.432950000 |
| 0.016010000 | 0.078890000 | 0.349640000 |
| 0.106850000 | 0.014000000 | 0.349660000 |
| 0.050690000 | 0.034460000 | 0.432980000 |
| 0.177770000 | 0.018750000 | 0.433030000 |
| 0.256070000 | 0.047020000 | 0.349690000 |
| 0.407100000 | 0.159370000 | 0.349860000 |
| 0.334720000 | 0.095080000 | 0.433060000 |
| 0.467290000 | 0.234500000 | 0.433050000 |
| 0.510500000 | 0.313790000 | 0.349560000 |
| 0.548420000 | 0.392620000 | 0.433160000 |
| 0.531450000 | 0.465470000 | 0.523960000 |
| 0.477760000 | 0.491110000 | 0.599710000 |
| 0.419670000 | 0.507590000 | 0.515600000 |
| 0.271190000 | 0.478440000 | 0.516090000 |
| 0.349000000 | 0.504070000 | 0.599040000 |
| 0.192240000 | 0.433880000 | 0.599560000 |
| 0.118860000 | 0.371090000 | 0.516270000 |
| 0.020450000 | 0.216740000 | 0.516270000 |
| 0.059230000 | 0.296020000 | 0.599630000 |
| 0.005750000 | 0.141880000 | 0.599600000 |
| 0.015990000 | 0.078870000 | 0.516290000 |
| 0.106830000 | 0.013990000 | 0.516340000 |
| 0.050660000 | 0.034430000 | 0.599640000 |
| 0.177810000 | 0.018870000 | 0.599730000 |
| 0.256070000 | 0.047050000 | 0.516400000 |
| 0.407140000 | 0.159370000 | 0.516270000 |
| 0.334790000 | 0.095220000 | 0.599690000 |
| 0.467000000 | 0.234200000 | 0.599510000 |
| 0.510660000 | 0.313690000 | 0.516610000 |

|             |             |             |
|-------------|-------------|-------------|
| 0.530530000 | 0.390920000 | 0.598490000 |
| 0.514760000 | 0.449680000 | 0.684230000 |
| 0.476990000 | 0.491340000 | 0.766420000 |
| 0.419710000 | 0.509300000 | 0.682450000 |
| 0.271380000 | 0.479290000 | 0.682670000 |
| 0.349420000 | 0.506120000 | 0.765890000 |
| 0.192430000 | 0.434070000 | 0.766220000 |
| 0.119090000 | 0.371060000 | 0.682980000 |
| 0.020520000 | 0.216730000 | 0.682940000 |
| 0.059440000 | 0.295990000 | 0.766300000 |
| 0.005710000 | 0.141840000 | 0.766270000 |
| 0.015930000 | 0.078820000 | 0.682950000 |
| 0.106840000 | 0.014040000 | 0.683020000 |
| 0.050620000 | 0.034420000 | 0.766310000 |
| 0.177900000 | 0.019090000 | 0.766390000 |
| 0.256160000 | 0.047360000 | 0.683080000 |
| 0.407430000 | 0.159160000 | 0.682920000 |
| 0.334950000 | 0.095360000 | 0.766390000 |
| 0.468190000 | 0.233780000 | 0.766110000 |
| 0.509090000 | 0.313270000 | 0.682670000 |
| 0.526150000 | 0.387860000 | 0.766430000 |
| 0.513760000 | 0.449370000 | 0.850090000 |
| 0.477550000 | 0.492450000 | 0.932820000 |
| 0.420510000 | 0.511530000 | 0.849360000 |
| 0.271520000 | 0.480070000 | 0.849460000 |
| 0.349650000 | 0.506990000 | 0.932840000 |
| 0.192520000 | 0.434150000 | 0.932880000 |
| 0.119310000 | 0.371040000 | 0.849600000 |
| 0.020580000 | 0.216720000 | 0.849600000 |
| 0.059540000 | 0.295990000 | 0.932910000 |

|             |             |             |
|-------------|-------------|-------------|
| 0.005700000 | 0.141830000 | 0.932950000 |
| 0.015880000 | 0.078790000 | 0.849620000 |
| 0.106870000 | 0.014100000 | 0.849680000 |
| 0.050620000 | 0.034420000 | 0.932990000 |
| 0.177930000 | 0.019190000 | 0.933020000 |
| 0.256250000 | 0.047630000 | 0.849730000 |
| 0.407920000 | 0.159010000 | 0.849660000 |
| 0.335050000 | 0.095440000 | 0.933060000 |
| 0.469010000 | 0.233420000 | 0.933120000 |
| 0.510390000 | 0.312690000 | 0.849700000 |
| 0.526130000 | 0.387740000 | 0.933060000 |
| 0.491080000 | 0.479020000 | 0.015820000 |
| 0.519530000 | 0.429560000 | 0.098760000 |
| 0.440510000 | 0.505780000 | 0.099440000 |
| 0.374180000 | 0.509860000 | 0.016280000 |
| 0.219020000 | 0.450730000 | 0.016240000 |
| 0.298010000 | 0.489910000 | 0.099690000 |
| 0.143280000 | 0.393280000 | 0.099530000 |
| 0.078600000 | 0.321880000 | 0.016220000 |
| 0.009130000 | 0.166560000 | 0.016280000 |
| 0.032140000 | 0.243430000 | 0.099560000 |
| 0.010980000 | 0.099160000 | 0.099640000 |
| 0.037470000 | 0.048040000 | 0.016320000 |
| 0.153240000 | 0.015820000 | 0.016340000 |
| 0.086730000 | 0.019340000 | 0.099670000 |
| 0.229590000 | 0.036510000 | 0.099650000 |
| 0.308620000 | 0.078200000 | 0.016350000 |
| 0.449140000 | 0.207930000 | 0.016650000 |
| 0.383760000 | 0.136710000 | 0.099800000 |
| 0.496890000 | 0.286380000 | 0.100400000 |

|             |             |             |
|-------------|-------------|-------------|
| 0.522430000 | 0.362980000 | 0.016580000 |
| 0.491570000 | 0.478890000 | 0.182030000 |
| 0.527130000 | 0.435260000 | 0.265380000 |
| 0.440230000 | 0.504020000 | 0.266190000 |
| 0.373670000 | 0.508030000 | 0.183120000 |
| 0.218880000 | 0.450390000 | 0.182950000 |
| 0.297790000 | 0.488650000 | 0.266420000 |
| 0.143040000 | 0.393250000 | 0.266190000 |
| 0.078400000 | 0.321900000 | 0.182850000 |
| 0.009130000 | 0.166590000 | 0.182940000 |
| 0.032020000 | 0.243450000 | 0.266230000 |
| 0.011030000 | 0.099210000 | 0.266310000 |
| 0.037520000 | 0.048080000 | 0.183000000 |
| 0.153200000 | 0.015690000 | 0.182990000 |
| 0.086730000 | 0.019300000 | 0.266330000 |
| 0.229500000 | 0.036240000 | 0.266330000 |
| 0.308510000 | 0.078010000 | 0.183030000 |
| 0.448090000 | 0.208320000 | 0.183440000 |
| 0.383430000 | 0.136820000 | 0.266540000 |
| 0.496110000 | 0.286750000 | 0.267020000 |
| 0.522840000 | 0.364290000 | 0.184530000 |
| 0.498050000 | 0.484150000 | 0.348070000 |
| 0.441340000 | 0.503750000 | 0.432790000 |
| 0.373420000 | 0.506220000 | 0.349800000 |
| 0.218700000 | 0.450050000 | 0.349570000 |
| 0.297620000 | 0.488000000 | 0.432850000 |
| 0.142910000 | 0.393240000 | 0.432890000 |
| 0.078200000 | 0.321910000 | 0.349550000 |
| 0.009130000 | 0.166610000 | 0.349610000 |
| 0.031970000 | 0.243450000 | 0.432930000 |

|             |             |             |
|-------------|-------------|-------------|
| 0.011050000 | 0.099230000 | 0.432960000 |
| 0.037540000 | 0.048090000 | 0.349660000 |
| 0.153150000 | 0.015550000 | 0.349670000 |
| 0.086710000 | 0.019270000 | 0.433000000 |
| 0.229450000 | 0.036110000 | 0.433040000 |
| 0.308400000 | 0.077830000 | 0.349720000 |
| 0.447770000 | 0.208620000 | 0.350020000 |
| 0.383320000 | 0.136830000 | 0.433070000 |
| 0.497630000 | 0.287120000 | 0.433050000 |
| 0.531390000 | 0.366520000 | 0.350940000 |
| 0.497520000 | 0.483590000 | 0.517330000 |
| 0.526830000 | 0.434700000 | 0.600730000 |
| 0.440030000 | 0.503750000 | 0.599470000 |
| 0.373390000 | 0.506180000 | 0.515860000 |
| 0.218700000 | 0.450060000 | 0.516160000 |
| 0.297780000 | 0.488670000 | 0.599280000 |
| 0.143040000 | 0.393250000 | 0.599580000 |
| 0.078200000 | 0.321910000 | 0.516270000 |
| 0.009130000 | 0.166610000 | 0.516280000 |
| 0.032030000 | 0.243440000 | 0.599620000 |
| 0.011010000 | 0.099190000 | 0.599620000 |
| 0.037530000 | 0.048070000 | 0.516310000 |
| 0.153140000 | 0.015540000 | 0.516370000 |
| 0.086700000 | 0.019270000 | 0.599660000 |
| 0.229500000 | 0.036270000 | 0.599750000 |
| 0.308400000 | 0.077860000 | 0.516400000 |
| 0.447860000 | 0.208590000 | 0.516110000 |
| 0.383460000 | 0.136850000 | 0.599600000 |
| 0.496350000 | 0.286650000 | 0.599190000 |
| 0.531540000 | 0.366380000 | 0.515250000 |

|             |             |             |
|-------------|-------------|-------------|
| 0.491200000 | 0.478390000 | 0.683660000 |
| 0.519530000 | 0.429400000 | 0.767260000 |
| 0.440370000 | 0.505560000 | 0.766220000 |
| 0.373620000 | 0.507990000 | 0.682560000 |
| 0.218880000 | 0.450410000 | 0.682790000 |
| 0.298000000 | 0.489940000 | 0.766020000 |
| 0.143290000 | 0.393280000 | 0.766250000 |
| 0.078410000 | 0.321890000 | 0.682960000 |
| 0.009130000 | 0.166580000 | 0.682950000 |
| 0.032150000 | 0.243430000 | 0.766290000 |
| 0.010960000 | 0.099150000 | 0.766280000 |
| 0.037480000 | 0.048040000 | 0.682970000 |
| 0.153190000 | 0.015680000 | 0.683050000 |
| 0.086700000 | 0.019300000 | 0.766330000 |
| 0.229590000 | 0.036550000 | 0.766420000 |
| 0.308520000 | 0.078070000 | 0.683080000 |
| 0.448230000 | 0.208260000 | 0.682750000 |
| 0.383780000 | 0.136730000 | 0.766350000 |
| 0.497090000 | 0.286290000 | 0.765870000 |
| 0.523010000 | 0.364130000 | 0.681740000 |
| 0.490980000 | 0.478860000 | 0.849900000 |
| 0.519580000 | 0.429520000 | 0.933000000 |
| 0.440940000 | 0.506790000 | 0.932820000 |
| 0.374160000 | 0.509850000 | 0.849390000 |
| 0.219010000 | 0.450740000 | 0.849510000 |
| 0.298120000 | 0.490500000 | 0.932860000 |
| 0.143400000 | 0.393290000 | 0.932890000 |
| 0.078600000 | 0.321880000 | 0.849600000 |
| 0.009130000 | 0.166550000 | 0.849610000 |
| 0.032200000 | 0.243430000 | 0.932920000 |

|             |             |             |
|-------------|-------------|-------------|
| 0.010940000 | 0.099130000 | 0.932960000 |
| 0.037450000 | 0.048020000 | 0.849640000 |
| 0.153240000 | 0.015810000 | 0.849700000 |
| 0.086710000 | 0.019340000 | 0.933000000 |
| 0.229630000 | 0.036670000 | 0.933030000 |
| 0.308620000 | 0.078230000 | 0.849750000 |
| 0.449200000 | 0.207910000 | 0.849580000 |
| 0.383990000 | 0.136690000 | 0.933080000 |
| 0.497950000 | 0.285910000 | 0.933140000 |
| 0.522510000 | 0.362940000 | 0.849630000 |
| 0.658720000 | 0.517890000 | 0.449200000 |
| 0.594780000 | 0.535670000 | 0.523470000 |
| 0.599630000 | 0.536480000 | 0.347470000 |
| 0.570440000 | 0.459920000 | 0.433300000 |

(7) Mn<sub>4</sub>/h-BN (0001) ( $G = -66769.2425$  eV)

1.0

|               |               |               |
|---------------|---------------|---------------|
| 12.5621004105 | 0.0000000000  | 0.0000000000  |
| -6.2810502052 | 10.8790980804 | 0.0000000000  |
| 0.0000000000  | 0.0000000000  | 22.7073001862 |

B N Mn

24 25 4

Direct

|             |             |             |
|-------------|-------------|-------------|
| 0.106420000 | 0.034480000 | 0.079840000 |
| 0.306490000 | 0.034400000 | 0.080660000 |
| 0.506690000 | 0.034630000 | 0.079950000 |
| 0.706680000 | 0.034880000 | 0.080580000 |
| 0.906640000 | 0.034780000 | 0.080400000 |
| 0.107270000 | 0.234910000 | 0.085250000 |
| 0.305020000 | 0.231290000 | 0.096900000 |
| 0.505110000 | 0.231430000 | 0.096650000 |



|             |             |             |
|-------------|-------------|-------------|
| 0.706140000 | 0.234960000 | 0.085370000 |
| 0.906510000 | 0.234680000 | 0.080480000 |
| 0.105910000 | 0.434400000 | 0.080150000 |
| 0.303450000 | 0.435110000 | 0.097740000 |
| 0.709720000 | 0.435950000 | 0.095390000 |
| 0.906730000 | 0.434550000 | 0.079530000 |
| 0.106460000 | 0.634630000 | 0.075010000 |
| 0.306220000 | 0.635060000 | 0.081160000 |
| 0.506310000 | 0.637980000 | 0.097170000 |
| 0.709810000 | 0.636280000 | 0.095240000 |
| 0.906830000 | 0.634760000 | 0.079890000 |
| 0.106580000 | 0.834770000 | 0.074880000 |
| 0.306740000 | 0.834930000 | 0.075190000 |
| 0.506890000 | 0.835490000 | 0.080020000 |
| 0.706370000 | 0.834190000 | 0.084680000 |
| 0.906880000 | 0.835030000 | 0.079380000 |
| 0.040090000 | 0.101540000 | 0.081560000 |
| 0.238900000 | 0.100190000 | 0.083690000 |
| 0.439780000 | 0.100150000 | 0.083590000 |
| 0.639960000 | 0.101410000 | 0.081750000 |
| 0.839960000 | 0.101370000 | 0.080470000 |
| 0.040100000 | 0.301250000 | 0.081580000 |
| 0.239840000 | 0.301330000 | 0.094540000 |
| 0.432290000 | 0.286320000 | 0.111720000 |
| 0.640070000 | 0.301070000 | 0.094420000 |
| 0.839730000 | 0.301210000 | 0.081370000 |
| 0.039980000 | 0.501220000 | 0.076310000 |
| 0.238870000 | 0.501510000 | 0.084620000 |
| 0.431580000 | 0.510240000 | 0.116050000 |
| 0.653870000 | 0.508460000 | 0.108800000 |

|             |             |             |
|-------------|-------------|-------------|
| 0.841130000 | 0.501420000 | 0.082800000 |
| 0.039970000 | 0.701350000 | 0.074780000 |
| 0.240010000 | 0.701360000 | 0.075430000 |
| 0.439760000 | 0.702470000 | 0.084270000 |
| 0.639930000 | 0.701560000 | 0.093410000 |
| 0.841100000 | 0.702460000 | 0.082650000 |
| 0.039930000 | 0.901440000 | 0.076280000 |
| 0.239940000 | 0.901300000 | 0.075120000 |
| 0.440050000 | 0.901400000 | 0.076610000 |
| 0.640010000 | 0.901300000 | 0.081380000 |
| 0.839740000 | 0.901300000 | 0.081040000 |
| 0.606010000 | 0.549590000 | 0.249700000 |
| 0.511400000 | 0.432670000 | 0.153520000 |
| 0.387570000 | 0.334220000 | 0.248140000 |
| 0.408620000 | 0.534420000 | 0.204640000 |

(8) Fe<sub>4</sub>/BNNT (6, 6) ( $G = -170974.8378$  eV)

1.0

|                |               |               |
|----------------|---------------|---------------|
| 26.4829998016  | 0.0000000000  | 0.0000000000  |
| -13.2414999008 | 22.9349505966 | 0.0000000000  |
| 0.0000000000   | 0.0000000000  | 14.7571001053 |

B N Fe

71 72 4

Direct

|             |             |             |
|-------------|-------------|-------------|
| 0.395060000 | 0.331900000 | 0.008720000 |
| 0.354410000 | 0.385220000 | 0.092340000 |
| 0.276900000 | 0.393600000 | 0.009970000 |
| 0.097390000 | 0.278120000 | 0.010380000 |
| 0.183510000 | 0.354300000 | 0.093790000 |
| 0.042610000 | 0.184040000 | 0.093560000 |
| 0.034640000 | 0.098850000 | 0.010130000 |

|             |             |             |
|-------------|-------------|-------------|
| 0.153820000 | 0.039110000 | 0.010300000 |
| 0.075460000 | 0.045730000 | 0.093480000 |
| 0.247650000 | 0.079570000 | 0.093970000 |
| 0.334220000 | 0.155400000 | 0.010930000 |
| 0.389900000 | 0.249700000 | 0.095460000 |
| 0.401730000 | 0.337680000 | 0.175280000 |
| 0.361390000 | 0.392490000 | 0.257840000 |
| 0.277830000 | 0.392980000 | 0.176590000 |
| 0.097800000 | 0.277600000 | 0.177120000 |
| 0.184570000 | 0.353050000 | 0.260530000 |
| 0.042280000 | 0.183640000 | 0.260200000 |
| 0.034080000 | 0.098390000 | 0.176780000 |
| 0.153570000 | 0.039280000 | 0.177070000 |
| 0.075020000 | 0.045440000 | 0.260220000 |
| 0.247650000 | 0.080420000 | 0.260660000 |
| 0.333670000 | 0.156330000 | 0.177520000 |
| 0.402790000 | 0.248750000 | 0.260930000 |
| 0.361150000 | 0.391940000 | 0.428960000 |
| 0.279790000 | 0.392550000 | 0.343500000 |
| 0.097880000 | 0.277200000 | 0.343510000 |
| 0.184530000 | 0.352980000 | 0.426480000 |
| 0.042240000 | 0.183650000 | 0.426880000 |
| 0.033770000 | 0.098160000 | 0.343580000 |
| 0.153440000 | 0.039410000 | 0.343630000 |
| 0.075060000 | 0.045480000 | 0.427000000 |
| 0.247700000 | 0.080360000 | 0.426610000 |
| 0.335640000 | 0.156140000 | 0.343630000 |
| 0.402940000 | 0.248530000 | 0.426390000 |
| 0.401610000 | 0.337090000 | 0.511810000 |
| 0.354320000 | 0.384790000 | 0.594570000 |

|             |             |             |
|-------------|-------------|-------------|
| 0.277750000 | 0.392620000 | 0.510380000 |
| 0.097720000 | 0.277590000 | 0.509930000 |
| 0.183480000 | 0.354190000 | 0.593200000 |
| 0.042540000 | 0.184030000 | 0.593540000 |
| 0.034080000 | 0.098410000 | 0.510360000 |
| 0.153630000 | 0.039330000 | 0.510180000 |
| 0.075530000 | 0.045810000 | 0.593720000 |
| 0.247730000 | 0.079470000 | 0.593330000 |
| 0.333860000 | 0.156110000 | 0.509820000 |
| 0.390100000 | 0.249470000 | 0.591930000 |
| 0.395110000 | 0.331750000 | 0.678430000 |
| 0.353750000 | 0.384690000 | 0.760600000 |
| 0.276880000 | 0.393370000 | 0.676950000 |
| 0.097330000 | 0.278110000 | 0.676670000 |
| 0.182940000 | 0.355030000 | 0.760030000 |
| 0.042780000 | 0.184330000 | 0.760220000 |
| 0.034640000 | 0.098870000 | 0.677010000 |
| 0.153880000 | 0.039160000 | 0.676950000 |
| 0.075950000 | 0.046130000 | 0.760330000 |
| 0.248150000 | 0.078680000 | 0.760150000 |
| 0.334350000 | 0.155230000 | 0.676460000 |
| 0.389810000 | 0.248020000 | 0.760110000 |
| 0.395680000 | 0.332230000 | 0.843580000 |
| 0.353760000 | 0.384810000 | 0.926340000 |
| 0.276690000 | 0.393770000 | 0.843460000 |
| 0.097220000 | 0.278310000 | 0.843530000 |
| 0.182940000 | 0.355090000 | 0.926940000 |
| 0.042810000 | 0.184340000 | 0.926890000 |
| 0.034900000 | 0.099080000 | 0.843570000 |
| 0.154090000 | 0.039200000 | 0.843620000 |

|             |             |             |
|-------------|-------------|-------------|
| 0.075920000 | 0.046100000 | 0.926850000 |
| 0.248120000 | 0.078720000 | 0.927180000 |
| 0.334730000 | 0.154380000 | 0.843700000 |
| 0.389780000 | 0.248110000 | 0.927250000 |
| 0.387970000 | 0.355560000 | 0.091070000 |
| 0.332590000 | 0.395410000 | 0.009450000 |
| 0.151190000 | 0.334080000 | 0.010490000 |
| 0.246770000 | 0.387530000 | 0.093720000 |
| 0.072680000 | 0.247390000 | 0.093650000 |
| 0.031800000 | 0.152260000 | 0.010120000 |
| 0.097320000 | 0.035730000 | 0.010210000 |
| 0.040550000 | 0.074100000 | 0.093410000 |
| 0.184360000 | 0.045490000 | 0.093810000 |
| 0.279880000 | 0.099910000 | 0.010750000 |
| 0.400550000 | 0.280230000 | 0.010490000 |
| 0.358900000 | 0.186380000 | 0.094220000 |
| 0.405010000 | 0.374990000 | 0.249460000 |
| 0.334480000 | 0.397270000 | 0.175810000 |
| 0.152080000 | 0.333050000 | 0.177350000 |
| 0.247950000 | 0.385810000 | 0.260750000 |
| 0.072690000 | 0.246960000 | 0.260220000 |
| 0.031310000 | 0.151840000 | 0.176760000 |
| 0.096850000 | 0.035440000 | 0.176930000 |
| 0.039990000 | 0.073690000 | 0.260170000 |
| 0.184340000 | 0.046080000 | 0.260470000 |
| 0.279300000 | 0.101160000 | 0.177290000 |
| 0.404450000 | 0.282860000 | 0.179820000 |
| 0.360850000 | 0.186050000 | 0.259990000 |
| 0.404350000 | 0.373890000 | 0.437350000 |
| 0.338210000 | 0.399210000 | 0.343490000 |

|             |             |             |
|-------------|-------------|-------------|
| 0.152420000 | 0.332270000 | 0.343500000 |
| 0.247900000 | 0.385590000 | 0.426250000 |
| 0.072630000 | 0.246970000 | 0.426810000 |
| 0.031020000 | 0.151620000 | 0.343550000 |
| 0.096620000 | 0.035310000 | 0.343620000 |
| 0.040010000 | 0.073720000 | 0.427010000 |
| 0.184370000 | 0.046090000 | 0.426780000 |
| 0.279850000 | 0.101710000 | 0.343620000 |
| 0.435140000 | 0.275440000 | 0.343690000 |
| 0.361040000 | 0.185840000 | 0.427320000 |
| 0.388020000 | 0.355290000 | 0.595980000 |
| 0.334250000 | 0.396630000 | 0.511090000 |
| 0.152010000 | 0.333020000 | 0.509660000 |
| 0.246730000 | 0.387270000 | 0.593240000 |
| 0.072590000 | 0.247390000 | 0.593410000 |
| 0.031280000 | 0.151850000 | 0.510350000 |
| 0.096930000 | 0.035520000 | 0.510290000 |
| 0.040590000 | 0.074150000 | 0.593750000 |
| 0.184420000 | 0.045520000 | 0.593450000 |
| 0.279390000 | 0.101000000 | 0.510000000 |
| 0.404600000 | 0.282510000 | 0.507580000 |
| 0.359110000 | 0.186120000 | 0.593150000 |
| 0.388480000 | 0.356200000 | 0.760980000 |
| 0.332560000 | 0.395180000 | 0.677430000 |
| 0.151150000 | 0.334030000 | 0.676520000 |
| 0.246290000 | 0.388190000 | 0.760070000 |
| 0.072500000 | 0.247690000 | 0.760150000 |
| 0.031760000 | 0.152260000 | 0.676990000 |
| 0.097390000 | 0.035810000 | 0.676990000 |
| 0.041090000 | 0.074550000 | 0.760320000 |

|             |             |             |
|-------------|-------------|-------------|
| 0.184740000 | 0.045370000 | 0.760210000 |
| 0.279950000 | 0.099770000 | 0.676600000 |
| 0.400590000 | 0.280060000 | 0.676820000 |
| 0.359890000 | 0.184720000 | 0.760220000 |
| 0.388440000 | 0.356260000 | 0.926080000 |
| 0.332390000 | 0.395470000 | 0.843450000 |
| 0.150910000 | 0.334390000 | 0.843500000 |
| 0.246300000 | 0.388290000 | 0.926840000 |
| 0.072540000 | 0.247690000 | 0.926930000 |
| 0.031980000 | 0.152440000 | 0.843560000 |
| 0.097660000 | 0.036000000 | 0.843590000 |
| 0.041070000 | 0.074520000 | 0.926820000 |
| 0.184710000 | 0.045360000 | 0.927060000 |
| 0.280180000 | 0.099060000 | 0.843680000 |
| 0.400480000 | 0.279890000 | 0.843640000 |
| 0.359820000 | 0.184810000 | 0.927180000 |
| 0.499890000 | 0.423810000 | 0.266470000 |
| 0.499120000 | 0.421860000 | 0.423660000 |
| 0.429400000 | 0.345210000 | 0.342980000 |
| 0.519580000 | 0.355690000 | 0.343150000 |

(9) Nb<sub>4</sub>/BNNT (6, 6) ( $G = -164393.8584$  eV)

1.0

|                |               |               |
|----------------|---------------|---------------|
| 26.4829998016  | 0.0000000000  | 0.0000000000  |
| -13.2414999008 | 22.9349505966 | 0.0000000000  |
| 0.0000000000   | 0.0000000000  | 14.7571001053 |

B N Nb

71 72 4

Direct

|             |             |             |
|-------------|-------------|-------------|
| 0.393930000 | 0.331420000 | 0.011180000 |
| 0.354800000 | 0.385760000 | 0.094410000 |

|             |             |             |
|-------------|-------------|-------------|
| 0.277150000 | 0.393550000 | 0.011690000 |
| 0.097350000 | 0.278960000 | 0.012060000 |
| 0.183710000 | 0.354570000 | 0.095480000 |
| 0.042830000 | 0.184940000 | 0.095190000 |
| 0.035080000 | 0.099770000 | 0.011810000 |
| 0.153570000 | 0.038860000 | 0.011850000 |
| 0.075840000 | 0.046580000 | 0.095180000 |
| 0.247230000 | 0.077390000 | 0.095510000 |
| 0.333310000 | 0.153570000 | 0.012520000 |
| 0.385880000 | 0.247700000 | 0.097050000 |
| 0.401110000 | 0.337650000 | 0.179530000 |
| 0.362120000 | 0.391570000 | 0.261170000 |
| 0.278040000 | 0.392340000 | 0.178770000 |
| 0.097500000 | 0.278580000 | 0.178600000 |
| 0.184020000 | 0.354060000 | 0.261860000 |
| 0.042600000 | 0.184780000 | 0.261820000 |
| 0.034710000 | 0.099490000 | 0.178480000 |
| 0.153420000 | 0.038950000 | 0.178810000 |
| 0.075580000 | 0.046510000 | 0.261950000 |
| 0.247480000 | 0.078360000 | 0.262440000 |
| 0.332740000 | 0.154010000 | 0.179000000 |
| 0.397160000 | 0.247530000 | 0.261870000 |
| 0.354100000 | 0.384170000 | 0.429890000 |
| 0.278640000 | 0.392450000 | 0.344740000 |
| 0.097340000 | 0.278600000 | 0.344990000 |
| 0.183540000 | 0.354730000 | 0.427880000 |
| 0.042680000 | 0.184980000 | 0.428500000 |
| 0.034520000 | 0.099470000 | 0.345240000 |
| 0.153590000 | 0.039650000 | 0.345490000 |
| 0.075650000 | 0.046750000 | 0.428690000 |



|             |             |             |
|-------------|-------------|-------------|
| 0.247960000 | 0.079490000 | 0.428530000 |
| 0.335540000 | 0.154190000 | 0.345050000 |
| 0.401610000 | 0.247570000 | 0.426600000 |
| 0.394010000 | 0.329910000 | 0.512650000 |
| 0.350330000 | 0.380630000 | 0.595540000 |
| 0.275970000 | 0.392540000 | 0.511980000 |
| 0.097150000 | 0.279110000 | 0.511560000 |
| 0.182440000 | 0.355830000 | 0.594980000 |
| 0.042930000 | 0.185340000 | 0.595180000 |
| 0.034750000 | 0.099750000 | 0.511980000 |
| 0.154000000 | 0.040260000 | 0.511950000 |
| 0.076010000 | 0.047070000 | 0.595330000 |
| 0.248180000 | 0.079340000 | 0.595000000 |
| 0.335280000 | 0.154810000 | 0.511350000 |
| 0.391940000 | 0.247820000 | 0.594240000 |
| 0.393090000 | 0.329100000 | 0.679600000 |
| 0.352350000 | 0.383020000 | 0.761650000 |
| 0.275820000 | 0.393160000 | 0.678510000 |
| 0.096840000 | 0.279400000 | 0.678480000 |
| 0.182430000 | 0.356020000 | 0.761920000 |
| 0.043050000 | 0.185420000 | 0.761910000 |
| 0.035120000 | 0.100050000 | 0.678620000 |
| 0.154170000 | 0.040080000 | 0.678480000 |
| 0.076250000 | 0.047170000 | 0.761890000 |
| 0.248200000 | 0.078130000 | 0.761690000 |
| 0.335300000 | 0.153890000 | 0.678380000 |
| 0.389870000 | 0.246820000 | 0.762310000 |
| 0.394660000 | 0.331150000 | 0.845260000 |
| 0.353760000 | 0.384840000 | 0.927850000 |
| 0.276440000 | 0.393620000 | 0.845030000 |

|             |             |             |
|-------------|-------------|-------------|
| 0.097000000 | 0.279300000 | 0.845350000 |
| 0.182990000 | 0.355580000 | 0.928750000 |
| 0.043020000 | 0.185240000 | 0.928580000 |
| 0.035270000 | 0.100040000 | 0.845210000 |
| 0.154020000 | 0.039490000 | 0.845080000 |
| 0.076150000 | 0.046910000 | 0.928460000 |
| 0.247770000 | 0.077320000 | 0.928620000 |
| 0.334610000 | 0.153100000 | 0.845580000 |
| 0.388100000 | 0.246840000 | 0.929370000 |
| 0.388080000 | 0.356050000 | 0.093730000 |
| 0.333190000 | 0.396150000 | 0.011190000 |
| 0.151280000 | 0.334690000 | 0.012230000 |
| 0.247010000 | 0.386810000 | 0.095600000 |
| 0.072500000 | 0.248210000 | 0.095230000 |
| 0.032210000 | 0.153150000 | 0.011790000 |
| 0.097510000 | 0.036410000 | 0.011820000 |
| 0.041080000 | 0.075080000 | 0.095130000 |
| 0.183910000 | 0.044510000 | 0.095390000 |
| 0.279520000 | 0.097670000 | 0.012270000 |
| 0.397550000 | 0.278660000 | 0.012580000 |
| 0.357190000 | 0.184560000 | 0.095860000 |
| 0.408820000 | 0.376440000 | 0.255620000 |
| 0.334870000 | 0.396560000 | 0.178750000 |
| 0.151750000 | 0.333930000 | 0.178680000 |
| 0.247350000 | 0.385940000 | 0.261890000 |
| 0.072360000 | 0.248030000 | 0.261780000 |
| 0.031870000 | 0.152880000 | 0.178450000 |
| 0.097240000 | 0.036240000 | 0.178650000 |
| 0.040710000 | 0.074880000 | 0.261890000 |
| 0.184120000 | 0.045320000 | 0.262260000 |

|             |             |             |
|-------------|-------------|-------------|
| 0.279090000 | 0.098270000 | 0.178890000 |
| 0.397540000 | 0.279780000 | 0.181410000 |
| 0.359610000 | 0.184190000 | 0.261380000 |
| 0.389770000 | 0.358230000 | 0.433810000 |
| 0.335970000 | 0.396960000 | 0.344590000 |
| 0.151520000 | 0.333980000 | 0.344780000 |
| 0.246820000 | 0.386750000 | 0.427470000 |
| 0.072350000 | 0.248250000 | 0.428400000 |
| 0.031750000 | 0.152900000 | 0.345220000 |
| 0.097180000 | 0.036410000 | 0.345390000 |
| 0.040680000 | 0.075000000 | 0.428660000 |
| 0.184600000 | 0.046400000 | 0.428640000 |
| 0.280010000 | 0.099590000 | 0.345330000 |
| 0.429260000 | 0.277890000 | 0.342490000 |
| 0.362100000 | 0.184420000 | 0.428130000 |
| 0.382500000 | 0.349620000 | 0.596780000 |
| 0.330520000 | 0.392960000 | 0.512570000 |
| 0.150950000 | 0.334960000 | 0.511260000 |
| 0.245640000 | 0.388280000 | 0.595110000 |
| 0.072320000 | 0.248640000 | 0.595090000 |
| 0.032040000 | 0.153220000 | 0.511970000 |
| 0.097520000 | 0.036830000 | 0.511980000 |
| 0.041050000 | 0.075340000 | 0.595340000 |
| 0.184840000 | 0.046480000 | 0.595120000 |
| 0.280060000 | 0.100300000 | 0.511660000 |
| 0.405270000 | 0.280350000 | 0.509520000 |
| 0.361000000 | 0.184420000 | 0.594980000 |
| 0.386940000 | 0.354280000 | 0.762010000 |
| 0.330520000 | 0.393030000 | 0.678740000 |
| 0.150290000 | 0.335560000 | 0.678470000 |

|             |             |             |
|-------------|-------------|-------------|
| 0.245760000 | 0.388390000 | 0.761990000 |
| 0.072280000 | 0.248700000 | 0.761910000 |
| 0.032350000 | 0.153480000 | 0.678590000 |
| 0.097840000 | 0.037020000 | 0.678550000 |
| 0.041400000 | 0.075530000 | 0.761900000 |
| 0.184810000 | 0.045820000 | 0.761720000 |
| 0.280350000 | 0.098980000 | 0.678330000 |
| 0.401050000 | 0.278680000 | 0.678710000 |
| 0.360380000 | 0.183490000 | 0.762320000 |
| 0.388070000 | 0.355870000 | 0.927810000 |
| 0.331910000 | 0.394830000 | 0.844760000 |
| 0.150620000 | 0.335340000 | 0.845480000 |
| 0.246340000 | 0.388250000 | 0.928690000 |
| 0.072440000 | 0.248520000 | 0.928640000 |
| 0.032410000 | 0.153430000 | 0.845190000 |
| 0.097880000 | 0.036860000 | 0.845130000 |
| 0.041400000 | 0.075390000 | 0.928460000 |
| 0.184380000 | 0.044940000 | 0.928530000 |
| 0.280110000 | 0.097770000 | 0.845330000 |
| 0.399320000 | 0.278660000 | 0.845720000 |
| 0.358990000 | 0.183570000 | 0.929190000 |
| 0.505320000 | 0.408470000 | 0.199340000 |
| 0.573740000 | 0.426900000 | 0.335050000 |
| 0.457930000 | 0.366900000 | 0.359750000 |
| 0.522470000 | 0.330300000 | 0.257610000 |

(10) \*N<sub>2</sub> adsorption on Mn<sub>4</sub>/BNNT (6, 6) ( $G = -171621.8246$  eV)

1.0

|                |               |               |
|----------------|---------------|---------------|
| 26.4829998016  | 0.0000000000  | 0.0000000000  |
| -13.2414999008 | 22.9349505966 | 0.0000000000  |
| 0.0000000000   | 0.0000000000  | 14.7571001053 |

B N Mn  
71 74 4

Direct

|             |             |             |
|-------------|-------------|-------------|
| 0.401140000 | 0.329800000 | 0.010920000 |
| 0.361450000 | 0.383080000 | 0.094480000 |
| 0.284220000 | 0.392370000 | 0.011980000 |
| 0.102840000 | 0.283810000 | 0.012370000 |
| 0.190880000 | 0.356570000 | 0.095700000 |
| 0.043980000 | 0.190520000 | 0.095780000 |
| 0.031400000 | 0.103430000 | 0.012560000 |
| 0.146160000 | 0.039000000 | 0.012930000 |
| 0.069080000 | 0.047660000 | 0.096060000 |
| 0.239660000 | 0.077510000 | 0.096750000 |
| 0.327730000 | 0.151210000 | 0.013850000 |
| 0.390030000 | 0.244770000 | 0.096780000 |
| 0.416580000 | 0.341760000 | 0.177320000 |
| 0.366530000 | 0.388890000 | 0.261150000 |
| 0.284540000 | 0.391060000 | 0.178680000 |
| 0.102810000 | 0.283450000 | 0.179090000 |
| 0.191320000 | 0.355710000 | 0.262350000 |
| 0.043700000 | 0.190290000 | 0.262450000 |
| 0.031090000 | 0.103180000 | 0.179270000 |
| 0.145780000 | 0.038800000 | 0.179730000 |
| 0.068890000 | 0.047500000 | 0.262900000 |
| 0.239560000 | 0.077540000 | 0.263350000 |
| 0.326480000 | 0.152710000 | 0.180590000 |
| 0.395810000 | 0.244060000 | 0.266030000 |
| 0.364440000 | 0.383700000 | 0.429090000 |
| 0.285370000 | 0.390190000 | 0.345360000 |
| 0.102750000 | 0.283240000 | 0.345600000 |

|             |             |             |
|-------------|-------------|-------------|
| 0.191290000 | 0.355570000 | 0.428530000 |
| 0.043700000 | 0.190340000 | 0.429150000 |
| 0.031030000 | 0.103140000 | 0.346040000 |
| 0.145840000 | 0.038750000 | 0.346450000 |
| 0.069210000 | 0.047770000 | 0.429660000 |
| 0.239970000 | 0.076590000 | 0.429590000 |
| 0.327970000 | 0.151250000 | 0.346640000 |
| 0.395710000 | 0.242370000 | 0.429880000 |
| 0.403990000 | 0.330340000 | 0.512860000 |
| 0.360800000 | 0.381800000 | 0.595650000 |
| 0.284550000 | 0.390460000 | 0.511740000 |
| 0.102830000 | 0.283490000 | 0.512150000 |
| 0.191040000 | 0.356600000 | 0.595140000 |
| 0.043980000 | 0.190590000 | 0.595820000 |
| 0.031300000 | 0.103360000 | 0.512760000 |
| 0.146320000 | 0.038980000 | 0.513050000 |
| 0.069720000 | 0.048190000 | 0.596280000 |
| 0.240320000 | 0.075880000 | 0.596340000 |
| 0.328300000 | 0.149610000 | 0.512850000 |
| 0.388810000 | 0.242130000 | 0.595880000 |
| 0.399630000 | 0.327730000 | 0.679710000 |
| 0.360730000 | 0.382950000 | 0.761990000 |
| 0.284450000 | 0.392420000 | 0.678450000 |
| 0.102890000 | 0.283870000 | 0.678840000 |
| 0.190850000 | 0.357440000 | 0.761940000 |
| 0.044220000 | 0.190780000 | 0.762460000 |
| 0.031610000 | 0.103610000 | 0.679370000 |
| 0.146680000 | 0.039220000 | 0.679720000 |
| 0.069900000 | 0.048360000 | 0.762820000 |
| 0.240590000 | 0.075790000 | 0.763210000 |

|             |             |             |
|-------------|-------------|-------------|
| 0.328870000 | 0.148860000 | 0.679660000 |
| 0.388470000 | 0.241560000 | 0.762930000 |
| 0.399810000 | 0.328340000 | 0.845210000 |
| 0.360560000 | 0.383040000 | 0.928140000 |
| 0.284380000 | 0.393200000 | 0.845190000 |
| 0.102900000 | 0.284000000 | 0.845600000 |
| 0.190770000 | 0.357430000 | 0.928850000 |
| 0.044210000 | 0.190740000 | 0.929110000 |
| 0.031650000 | 0.103640000 | 0.845940000 |
| 0.146660000 | 0.039270000 | 0.846310000 |
| 0.069590000 | 0.048100000 | 0.929350000 |
| 0.240310000 | 0.076480000 | 0.930100000 |
| 0.328900000 | 0.149120000 | 0.846870000 |
| 0.389130000 | 0.242660000 | 0.929590000 |
| 0.396900000 | 0.355620000 | 0.093260000 |
| 0.339500000 | 0.393410000 | 0.011660000 |
| 0.158610000 | 0.337790000 | 0.012310000 |
| 0.254120000 | 0.386630000 | 0.095670000 |
| 0.076770000 | 0.253870000 | 0.095660000 |
| 0.031750000 | 0.158470000 | 0.012410000 |
| 0.090290000 | 0.036890000 | 0.012760000 |
| 0.035920000 | 0.077820000 | 0.095900000 |
| 0.176410000 | 0.044630000 | 0.096460000 |
| 0.272120000 | 0.097250000 | 0.013720000 |
| 0.403490000 | 0.276030000 | 0.012510000 |
| 0.353030000 | 0.182150000 | 0.097160000 |
| 0.413900000 | 0.375740000 | 0.255650000 |
| 0.340650000 | 0.393800000 | 0.178300000 |
| 0.158870000 | 0.337060000 | 0.179120000 |
| 0.254630000 | 0.385270000 | 0.262370000 |

|             |             |             |
|-------------|-------------|-------------|
| 0.076550000 | 0.253620000 | 0.262300000 |
| 0.031430000 | 0.158220000 | 0.179080000 |
| 0.089820000 | 0.036500000 | 0.179510000 |
| 0.035710000 | 0.077670000 | 0.262690000 |
| 0.176270000 | 0.044550000 | 0.263070000 |
| 0.271430000 | 0.098390000 | 0.180030000 |
| 0.409960000 | 0.278930000 | 0.180860000 |
| 0.353040000 | 0.182010000 | 0.263350000 |
| 0.403910000 | 0.361150000 | 0.433000000 |
| 0.342100000 | 0.393570000 | 0.345210000 |
| 0.158950000 | 0.336610000 | 0.345440000 |
| 0.254480000 | 0.384840000 | 0.428200000 |
| 0.076560000 | 0.253660000 | 0.428970000 |
| 0.031250000 | 0.158120000 | 0.345850000 |
| 0.089910000 | 0.036570000 | 0.346290000 |
| 0.035900000 | 0.077810000 | 0.429470000 |
| 0.176550000 | 0.044460000 | 0.429590000 |
| 0.271890000 | 0.097360000 | 0.346280000 |
| 0.421150000 | 0.273060000 | 0.348020000 |
| 0.355010000 | 0.179350000 | 0.430080000 |
| 0.394410000 | 0.352390000 | 0.596770000 |
| 0.339820000 | 0.391740000 | 0.511710000 |
| 0.158900000 | 0.337040000 | 0.511850000 |
| 0.254290000 | 0.386660000 | 0.594860000 |
| 0.076770000 | 0.253930000 | 0.595640000 |
| 0.031440000 | 0.158290000 | 0.512590000 |
| 0.090500000 | 0.037070000 | 0.512970000 |
| 0.036300000 | 0.078110000 | 0.596130000 |
| 0.176930000 | 0.044530000 | 0.596340000 |
| 0.272180000 | 0.095940000 | 0.512870000 |



|             |             |             |
|-------------|-------------|-------------|
| 0.403820000 | 0.274950000 | 0.512890000 |
| 0.354870000 | 0.178680000 | 0.596380000 |
| 0.394250000 | 0.353190000 | 0.762430000 |
| 0.339730000 | 0.393410000 | 0.678570000 |
| 0.158710000 | 0.337800000 | 0.678580000 |
| 0.254200000 | 0.388070000 | 0.761760000 |
| 0.076940000 | 0.254130000 | 0.762300000 |
| 0.031760000 | 0.158540000 | 0.679230000 |
| 0.090940000 | 0.037450000 | 0.679590000 |
| 0.036480000 | 0.078250000 | 0.762690000 |
| 0.177190000 | 0.044740000 | 0.763100000 |
| 0.272670000 | 0.095190000 | 0.679760000 |
| 0.400860000 | 0.273620000 | 0.679890000 |
| 0.355340000 | 0.178200000 | 0.763350000 |
| 0.394220000 | 0.353480000 | 0.927910000 |
| 0.339750000 | 0.394230000 | 0.845090000 |
| 0.158600000 | 0.338100000 | 0.845430000 |
| 0.254120000 | 0.388070000 | 0.928720000 |
| 0.076920000 | 0.254100000 | 0.928970000 |
| 0.031890000 | 0.158620000 | 0.845810000 |
| 0.090890000 | 0.037410000 | 0.846150000 |
| 0.036290000 | 0.078120000 | 0.929240000 |
| 0.176950000 | 0.044770000 | 0.929840000 |
| 0.272700000 | 0.095560000 | 0.846880000 |
| 0.401200000 | 0.274170000 | 0.845980000 |
| 0.354990000 | 0.179410000 | 0.930330000 |
| 0.561780000 | 0.421530000 | 0.195140000 |
| 0.582000000 | 0.387060000 | 0.212900000 |
| 0.496100000 | 0.425230000 | 0.221280000 |
| 0.556560000 | 0.395080000 | 0.335250000 |

|             |             |             |
|-------------|-------------|-------------|
| 0.451550000 | 0.355810000 | 0.348070000 |
| 0.499400000 | 0.333970000 | 0.185370000 |

(11) \*NNH adsorption on Mn<sub>4</sub>/BNNT (6, 6) ( $G = -171637.4698$  eV)

1.0

|                |               |               |
|----------------|---------------|---------------|
| 26.4829998016  | 0.0000000000  | 0.0000000000  |
| -13.2414999008 | 22.9349505966 | 0.0000000000  |
| 0.0000000000   | 0.0000000000  | 14.7571001053 |

|    |    |    |   |
|----|----|----|---|
| B  | N  | Mn | H |
| 71 | 74 | 4  | 1 |

Direct

|             |             |             |
|-------------|-------------|-------------|
| 0.402670000 | 0.328430000 | 0.010340000 |
| 0.364070000 | 0.382510000 | 0.094080000 |
| 0.286940000 | 0.392210000 | 0.011630000 |
| 0.105020000 | 0.285470000 | 0.011910000 |
| 0.193640000 | 0.357260000 | 0.095260000 |
| 0.044760000 | 0.192490000 | 0.095290000 |
| 0.030430000 | 0.104760000 | 0.012040000 |
| 0.143110000 | 0.038000000 | 0.012280000 |
| 0.066740000 | 0.047780000 | 0.095490000 |
| 0.236470000 | 0.075480000 | 0.096030000 |
| 0.324960000 | 0.148780000 | 0.013200000 |
| 0.388230000 | 0.242150000 | 0.096240000 |
| 0.417280000 | 0.339360000 | 0.176910000 |
| 0.368320000 | 0.387290000 | 0.260970000 |
| 0.287100000 | 0.390690000 | 0.178280000 |
| 0.104980000 | 0.285130000 | 0.178620000 |
| 0.194020000 | 0.356450000 | 0.261910000 |
| 0.044500000 | 0.192290000 | 0.261970000 |
| 0.030180000 | 0.104530000 | 0.178750000 |
| 0.142700000 | 0.037680000 | 0.179110000 |

|             |             |             |
|-------------|-------------|-------------|
| 0.066560000 | 0.047630000 | 0.262330000 |
| 0.236380000 | 0.075470000 | 0.262740000 |
| 0.323500000 | 0.150110000 | 0.179800000 |
| 0.392850000 | 0.241110000 | 0.265070000 |
| 0.366770000 | 0.383180000 | 0.428870000 |
| 0.287910000 | 0.390080000 | 0.344970000 |
| 0.104920000 | 0.284970000 | 0.345140000 |
| 0.194000000 | 0.356440000 | 0.428110000 |
| 0.044510000 | 0.192350000 | 0.428650000 |
| 0.030110000 | 0.104500000 | 0.345500000 |
| 0.142780000 | 0.037690000 | 0.345880000 |
| 0.066840000 | 0.047900000 | 0.429100000 |
| 0.236800000 | 0.074820000 | 0.429040000 |
| 0.325000000 | 0.148790000 | 0.346040000 |
| 0.394090000 | 0.239920000 | 0.428930000 |
| 0.405120000 | 0.329010000 | 0.512370000 |
| 0.362950000 | 0.381270000 | 0.595270000 |
| 0.287150000 | 0.390610000 | 0.511360000 |
| 0.105030000 | 0.285220000 | 0.511710000 |
| 0.193770000 | 0.357490000 | 0.594740000 |
| 0.044770000 | 0.192590000 | 0.595320000 |
| 0.030310000 | 0.104700000 | 0.512210000 |
| 0.143290000 | 0.038090000 | 0.512500000 |
| 0.067320000 | 0.048330000 | 0.595720000 |
| 0.237230000 | 0.074420000 | 0.595710000 |
| 0.325580000 | 0.147520000 | 0.512120000 |
| 0.387660000 | 0.239770000 | 0.595070000 |
| 0.400430000 | 0.326000000 | 0.679220000 |
| 0.362930000 | 0.382350000 | 0.761560000 |
| 0.287090000 | 0.392570000 | 0.678070000 |

|             |             |             |
|-------------|-------------|-------------|
| 0.105100000 | 0.285570000 | 0.678400000 |
| 0.193610000 | 0.358250000 | 0.761570000 |
| 0.044980000 | 0.192750000 | 0.761970000 |
| 0.030570000 | 0.104920000 | 0.678830000 |
| 0.143700000 | 0.038430000 | 0.679120000 |
| 0.067500000 | 0.048500000 | 0.762250000 |
| 0.237510000 | 0.074290000 | 0.762530000 |
| 0.326240000 | 0.146720000 | 0.678940000 |
| 0.387230000 | 0.239030000 | 0.762310000 |
| 0.400730000 | 0.326640000 | 0.844680000 |
| 0.363030000 | 0.382530000 | 0.927710000 |
| 0.287070000 | 0.393210000 | 0.844840000 |
| 0.105100000 | 0.285670000 | 0.845160000 |
| 0.193560000 | 0.358150000 | 0.928460000 |
| 0.044970000 | 0.192700000 | 0.928630000 |
| 0.030610000 | 0.104950000 | 0.845420000 |
| 0.143670000 | 0.038430000 | 0.845670000 |
| 0.067210000 | 0.048230000 | 0.928780000 |
| 0.237190000 | 0.074770000 | 0.929390000 |
| 0.326220000 | 0.146840000 | 0.846210000 |
| 0.387660000 | 0.240060000 | 0.929110000 |
| 0.399770000 | 0.355220000 | 0.092580000 |
| 0.342110000 | 0.392990000 | 0.011340000 |
| 0.161330000 | 0.338840000 | 0.011890000 |
| 0.256850000 | 0.386620000 | 0.095250000 |
| 0.078580000 | 0.255800000 | 0.095200000 |
| 0.031950000 | 0.160360000 | 0.011920000 |
| 0.087570000 | 0.036590000 | 0.012160000 |
| 0.034410000 | 0.078820000 | 0.095380000 |
| 0.173200000 | 0.043160000 | 0.095800000 |

|             |             |             |
|-------------|-------------|-------------|
| 0.269000000 | 0.095140000 | 0.013040000 |
| 0.402490000 | 0.273420000 | 0.012000000 |
| 0.350340000 | 0.179550000 | 0.096530000 |
| 0.414930000 | 0.373050000 | 0.255380000 |
| 0.342870000 | 0.392720000 | 0.177940000 |
| 0.161560000 | 0.338130000 | 0.178660000 |
| 0.257290000 | 0.385310000 | 0.261930000 |
| 0.078380000 | 0.255580000 | 0.261850000 |
| 0.031690000 | 0.160130000 | 0.178590000 |
| 0.087100000 | 0.036150000 | 0.178930000 |
| 0.034220000 | 0.078670000 | 0.262150000 |
| 0.173040000 | 0.043050000 | 0.262480000 |
| 0.268240000 | 0.095990000 | 0.179350000 |
| 0.407540000 | 0.275930000 | 0.180410000 |
| 0.349980000 | 0.179220000 | 0.262650000 |
| 0.406060000 | 0.360550000 | 0.432900000 |
| 0.344370000 | 0.392900000 | 0.344880000 |
| 0.161610000 | 0.337750000 | 0.344990000 |
| 0.257150000 | 0.385180000 | 0.427790000 |
| 0.078410000 | 0.255630000 | 0.428510000 |
| 0.031540000 | 0.160060000 | 0.345350000 |
| 0.087170000 | 0.036230000 | 0.345730000 |
| 0.034350000 | 0.078790000 | 0.428930000 |
| 0.173380000 | 0.043180000 | 0.429050000 |
| 0.268710000 | 0.095130000 | 0.345710000 |
| 0.419230000 | 0.270210000 | 0.346570000 |
| 0.352400000 | 0.177030000 | 0.429270000 |
| 0.395870000 | 0.351140000 | 0.596430000 |
| 0.342200000 | 0.391520000 | 0.511390000 |
| 0.161570000 | 0.338210000 | 0.511430000 |

|             |             |             |
|-------------|-------------|-------------|
| 0.256980000 | 0.387050000 | 0.594500000 |
| 0.078630000 | 0.255890000 | 0.595180000 |
| 0.031680000 | 0.160220000 | 0.512090000 |
| 0.087760000 | 0.036780000 | 0.512420000 |
| 0.034670000 | 0.079050000 | 0.595590000 |
| 0.173840000 | 0.043480000 | 0.595750000 |
| 0.269080000 | 0.094220000 | 0.512240000 |
| 0.403360000 | 0.272710000 | 0.512070000 |
| 0.352480000 | 0.176370000 | 0.595610000 |
| 0.395750000 | 0.351870000 | 0.761930000 |
| 0.342180000 | 0.393220000 | 0.678220000 |
| 0.161410000 | 0.338930000 | 0.678190000 |
| 0.256930000 | 0.388350000 | 0.761440000 |
| 0.078770000 | 0.256070000 | 0.761850000 |
| 0.031930000 | 0.160440000 | 0.678730000 |
| 0.088230000 | 0.037220000 | 0.679020000 |
| 0.034840000 | 0.079190000 | 0.762160000 |
| 0.174120000 | 0.043690000 | 0.762460000 |
| 0.269620000 | 0.093510000 | 0.679080000 |
| 0.400300000 | 0.271210000 | 0.679250000 |
| 0.352980000 | 0.175710000 | 0.762690000 |
| 0.396240000 | 0.352500000 | 0.927320000 |
| 0.342290000 | 0.393950000 | 0.844740000 |
| 0.161330000 | 0.339170000 | 0.845040000 |
| 0.256880000 | 0.388130000 | 0.928390000 |
| 0.078730000 | 0.256020000 | 0.928510000 |
| 0.032050000 | 0.160500000 | 0.845320000 |
| 0.088190000 | 0.037170000 | 0.845560000 |
| 0.034710000 | 0.079080000 | 0.928710000 |
| 0.173830000 | 0.043560000 | 0.929170000 |

|             |             |             |
|-------------|-------------|-------------|
| 0.269630000 | 0.093700000 | 0.846190000 |
| 0.400460000 | 0.271650000 | 0.845440000 |
| 0.352490000 | 0.176850000 | 0.929730000 |
| 0.577070000 | 0.443820000 | 0.211760000 |
| 0.574120000 | 0.389300000 | 0.211370000 |
| 0.496870000 | 0.426420000 | 0.221960000 |
| 0.559150000 | 0.399440000 | 0.336290000 |
| 0.453530000 | 0.353730000 | 0.348500000 |
| 0.497240000 | 0.326610000 | 0.202790000 |
| 0.618550000 | 0.477680000 | 0.200660000 |

(12) \*HNNH adsorption on Mn<sub>4</sub>/BNNT (6, 6) ( $G = -171653.3507$  eV)

1.0

|                |               |               |
|----------------|---------------|---------------|
| 26.4829998016  | 0.0000000000  | 0.0000000000  |
| -13.2414999008 | 22.9349505966 | 0.0000000000  |
| 0.0000000000   | 0.0000000000  | 14.7571001053 |

|    |    |    |   |
|----|----|----|---|
| B  | N  | Mn | H |
| 71 | 74 | 4  | 2 |

Direct

|             |             |             |
|-------------|-------------|-------------|
| 0.401860000 | 0.327530000 | 0.010480000 |
| 0.363620000 | 0.381910000 | 0.094290000 |
| 0.287050000 | 0.392470000 | 0.011840000 |
| 0.105260000 | 0.285920000 | 0.012050000 |
| 0.193870000 | 0.357670000 | 0.095480000 |
| 0.044980000 | 0.192910000 | 0.095370000 |
| 0.030590000 | 0.105160000 | 0.012060000 |
| 0.143000000 | 0.038030000 | 0.012220000 |
| 0.066750000 | 0.048050000 | 0.095470000 |
| 0.236340000 | 0.075160000 | 0.095930000 |
| 0.324980000 | 0.148200000 | 0.013040000 |
| 0.388360000 | 0.241520000 | 0.095950000 |

|             |             |             |
|-------------|-------------|-------------|
| 0.416600000 | 0.338420000 | 0.177040000 |
| 0.368450000 | 0.387040000 | 0.261200000 |
| 0.287350000 | 0.390910000 | 0.178530000 |
| 0.105220000 | 0.285530000 | 0.178760000 |
| 0.194290000 | 0.356760000 | 0.262100000 |
| 0.044700000 | 0.192690000 | 0.262040000 |
| 0.030300000 | 0.104910000 | 0.178770000 |
| 0.142570000 | 0.037700000 | 0.179040000 |
| 0.066530000 | 0.047860000 | 0.262290000 |
| 0.236190000 | 0.075210000 | 0.262650000 |
| 0.323520000 | 0.149590000 | 0.179680000 |
| 0.392470000 | 0.240730000 | 0.264990000 |
| 0.367120000 | 0.383450000 | 0.429140000 |
| 0.288200000 | 0.390220000 | 0.345160000 |
| 0.105160000 | 0.285350000 | 0.345270000 |
| 0.194280000 | 0.356750000 | 0.428250000 |
| 0.044720000 | 0.192750000 | 0.428730000 |
| 0.030220000 | 0.104870000 | 0.345530000 |
| 0.142580000 | 0.037640000 | 0.345800000 |
| 0.066770000 | 0.048090000 | 0.429070000 |
| 0.236520000 | 0.074630000 | 0.428960000 |
| 0.324700000 | 0.148590000 | 0.346000000 |
| 0.393480000 | 0.240030000 | 0.428780000 |
| 0.405220000 | 0.329300000 | 0.512600000 |
| 0.363080000 | 0.381470000 | 0.595570000 |
| 0.287420000 | 0.390870000 | 0.511550000 |
| 0.105280000 | 0.285630000 | 0.511810000 |
| 0.194020000 | 0.357900000 | 0.594880000 |
| 0.045020000 | 0.193020000 | 0.595400000 |
| 0.030450000 | 0.105070000 | 0.512250000 |



|             |             |             |
|-------------|-------------|-------------|
| 0.143040000 | 0.037990000 | 0.512430000 |
| 0.067250000 | 0.048520000 | 0.595710000 |
| 0.236960000 | 0.074210000 | 0.595580000 |
| 0.325220000 | 0.147460000 | 0.511980000 |
| 0.387280000 | 0.239680000 | 0.594930000 |
| 0.400180000 | 0.325830000 | 0.679420000 |
| 0.362860000 | 0.382300000 | 0.761830000 |
| 0.287290000 | 0.392940000 | 0.678290000 |
| 0.105350000 | 0.286020000 | 0.678500000 |
| 0.193810000 | 0.358740000 | 0.761710000 |
| 0.045250000 | 0.193200000 | 0.762050000 |
| 0.030740000 | 0.105320000 | 0.678870000 |
| 0.143480000 | 0.038350000 | 0.679060000 |
| 0.067490000 | 0.048730000 | 0.762240000 |
| 0.237290000 | 0.074010000 | 0.762390000 |
| 0.325990000 | 0.146490000 | 0.678730000 |
| 0.386940000 | 0.238710000 | 0.762160000 |
| 0.400260000 | 0.326140000 | 0.844830000 |
| 0.362720000 | 0.382180000 | 0.927960000 |
| 0.287200000 | 0.393540000 | 0.845060000 |
| 0.105340000 | 0.286140000 | 0.845280000 |
| 0.193740000 | 0.358640000 | 0.928640000 |
| 0.045220000 | 0.193150000 | 0.928700000 |
| 0.030800000 | 0.105360000 | 0.845450000 |
| 0.143520000 | 0.038400000 | 0.845620000 |
| 0.067230000 | 0.048500000 | 0.928770000 |
| 0.237030000 | 0.074450000 | 0.929270000 |
| 0.326090000 | 0.146400000 | 0.845990000 |
| 0.387440000 | 0.239520000 | 0.928920000 |
| 0.398530000 | 0.353890000 | 0.092770000 |

|             |             |             |
|-------------|-------------|-------------|
| 0.341990000 | 0.392850000 | 0.011540000 |
| 0.161530000 | 0.339310000 | 0.012080000 |
| 0.257060000 | 0.387000000 | 0.095520000 |
| 0.078810000 | 0.256220000 | 0.095310000 |
| 0.032180000 | 0.160790000 | 0.011980000 |
| 0.087520000 | 0.036780000 | 0.012140000 |
| 0.034490000 | 0.079170000 | 0.095390000 |
| 0.173050000 | 0.043110000 | 0.095730000 |
| 0.268880000 | 0.094670000 | 0.012910000 |
| 0.402250000 | 0.272770000 | 0.011810000 |
| 0.350540000 | 0.178850000 | 0.096370000 |
| 0.414520000 | 0.372000000 | 0.255720000 |
| 0.343010000 | 0.392740000 | 0.178220000 |
| 0.161790000 | 0.338500000 | 0.178850000 |
| 0.257520000 | 0.385510000 | 0.262160000 |
| 0.078570000 | 0.255970000 | 0.261960000 |
| 0.031860000 | 0.160530000 | 0.178650000 |
| 0.087040000 | 0.036340000 | 0.178900000 |
| 0.034290000 | 0.079010000 | 0.262160000 |
| 0.172840000 | 0.042950000 | 0.262410000 |
| 0.268110000 | 0.095570000 | 0.179270000 |
| 0.407580000 | 0.275320000 | 0.180120000 |
| 0.349830000 | 0.178790000 | 0.262550000 |
| 0.406630000 | 0.361200000 | 0.433460000 |
| 0.344570000 | 0.392940000 | 0.345070000 |
| 0.161860000 | 0.338070000 | 0.345160000 |
| 0.257400000 | 0.385370000 | 0.427960000 |
| 0.078600000 | 0.256030000 | 0.428630000 |
| 0.031690000 | 0.160450000 | 0.345420000 |
| 0.087050000 | 0.036360000 | 0.345680000 |

|             |             |             |
|-------------|-------------|-------------|
| 0.034420000 | 0.079130000 | 0.428940000 |
| 0.173100000 | 0.042990000 | 0.428980000 |
| 0.268460000 | 0.094860000 | 0.345660000 |
| 0.418220000 | 0.270450000 | 0.346330000 |
| 0.351940000 | 0.177060000 | 0.429160000 |
| 0.395810000 | 0.351170000 | 0.596800000 |
| 0.342430000 | 0.391790000 | 0.511650000 |
| 0.161820000 | 0.338590000 | 0.511570000 |
| 0.257210000 | 0.387430000 | 0.594670000 |
| 0.078850000 | 0.256310000 | 0.595290000 |
| 0.031880000 | 0.160620000 | 0.512160000 |
| 0.087590000 | 0.036860000 | 0.512390000 |
| 0.034770000 | 0.079400000 | 0.595620000 |
| 0.173560000 | 0.043300000 | 0.595670000 |
| 0.268800000 | 0.094030000 | 0.512120000 |
| 0.402950000 | 0.272700000 | 0.512070000 |
| 0.352150000 | 0.176240000 | 0.595450000 |
| 0.395420000 | 0.351560000 | 0.762220000 |
| 0.342290000 | 0.393420000 | 0.678520000 |
| 0.161610000 | 0.339410000 | 0.678310000 |
| 0.257120000 | 0.388820000 | 0.761630000 |
| 0.079020000 | 0.256510000 | 0.761950000 |
| 0.032190000 | 0.160870000 | 0.678800000 |
| 0.088090000 | 0.037310000 | 0.679000000 |
| 0.034960000 | 0.079560000 | 0.762180000 |
| 0.173890000 | 0.043550000 | 0.762380000 |
| 0.269370000 | 0.093240000 | 0.678920000 |
| 0.399990000 | 0.270990000 | 0.679240000 |
| 0.352780000 | 0.175370000 | 0.762490000 |
| 0.395580000 | 0.351780000 | 0.927550000 |

|             |             |             |
|-------------|-------------|-------------|
| 0.342240000 | 0.393930000 | 0.845000000 |
| 0.161510000 | 0.339690000 | 0.845200000 |
| 0.257050000 | 0.388610000 | 0.928600000 |
| 0.078980000 | 0.256470000 | 0.928630000 |
| 0.032320000 | 0.160950000 | 0.845380000 |
| 0.088100000 | 0.037320000 | 0.845540000 |
| 0.034810000 | 0.079440000 | 0.928730000 |
| 0.173660000 | 0.043470000 | 0.929100000 |
| 0.269440000 | 0.093320000 | 0.846030000 |
| 0.400120000 | 0.271210000 | 0.845370000 |
| 0.352470000 | 0.176270000 | 0.929520000 |
| 0.576480000 | 0.440870000 | 0.211140000 |
| 0.578200000 | 0.386510000 | 0.213910000 |
| 0.495950000 | 0.423600000 | 0.219320000 |
| 0.557360000 | 0.402730000 | 0.341340000 |
| 0.454110000 | 0.354100000 | 0.349390000 |
| 0.496260000 | 0.324010000 | 0.204040000 |
| 0.616100000 | 0.476000000 | 0.194990000 |
| 0.618610000 | 0.392670000 | 0.198990000 |

(13) \*HNNH<sub>2</sub> adsorption on Mn<sub>4</sub>/BNNT (6, 6) ( $G = -171669.8609$  eV)

1.0

|                |               |               |
|----------------|---------------|---------------|
| 26.4829998016  | 0.0000000000  | 0.0000000000  |
| -13.2414999008 | 22.9349505966 | 0.0000000000  |
| 0.0000000000   | 0.0000000000  | 14.7571001053 |

B N Mn H

71 74 4 3

Direct

|             |             |             |
|-------------|-------------|-------------|
| 0.402250000 | 0.327450000 | 0.011790000 |
| 0.364380000 | 0.382120000 | 0.095320000 |
| 0.287700000 | 0.392510000 | 0.012790000 |

|             |             |             |
|-------------|-------------|-------------|
| 0.105760000 | 0.286420000 | 0.013100000 |
| 0.194530000 | 0.357940000 | 0.096460000 |
| 0.045180000 | 0.193500000 | 0.096480000 |
| 0.030480000 | 0.105630000 | 0.013240000 |
| 0.142460000 | 0.038010000 | 0.013520000 |
| 0.066380000 | 0.048300000 | 0.096720000 |
| 0.235760000 | 0.074950000 | 0.097310000 |
| 0.324420000 | 0.147970000 | 0.014530000 |
| 0.387880000 | 0.241240000 | 0.097720000 |
| 0.417520000 | 0.338650000 | 0.178330000 |
| 0.369000000 | 0.387090000 | 0.262150000 |
| 0.287980000 | 0.391050000 | 0.179500000 |
| 0.105700000 | 0.286070000 | 0.179800000 |
| 0.194890000 | 0.357070000 | 0.263080000 |
| 0.044880000 | 0.193300000 | 0.263140000 |
| 0.030210000 | 0.105410000 | 0.179950000 |
| 0.142050000 | 0.037670000 | 0.180360000 |
| 0.066200000 | 0.048150000 | 0.263550000 |
| 0.235670000 | 0.074910000 | 0.264020000 |
| 0.322990000 | 0.149260000 | 0.181170000 |
| 0.392420000 | 0.240320000 | 0.266550000 |
| 0.366960000 | 0.382180000 | 0.429900000 |
| 0.288650000 | 0.390090000 | 0.346130000 |
| 0.105590000 | 0.285890000 | 0.346310000 |
| 0.194810000 | 0.356990000 | 0.429260000 |
| 0.044860000 | 0.193360000 | 0.429830000 |
| 0.030130000 | 0.105380000 | 0.346700000 |
| 0.142130000 | 0.037700000 | 0.347120000 |
| 0.066490000 | 0.048440000 | 0.430310000 |
| 0.236100000 | 0.074340000 | 0.430290000 |

|             |             |             |
|-------------|-------------|-------------|
| 0.324490000 | 0.147950000 | 0.347290000 |
| 0.393950000 | 0.239110000 | 0.429920000 |
| 0.405070000 | 0.327990000 | 0.513320000 |
| 0.363230000 | 0.380570000 | 0.596340000 |
| 0.287820000 | 0.390490000 | 0.512480000 |
| 0.105660000 | 0.286150000 | 0.512870000 |
| 0.194570000 | 0.358080000 | 0.595880000 |
| 0.045130000 | 0.193600000 | 0.596510000 |
| 0.030340000 | 0.105590000 | 0.513410000 |
| 0.142650000 | 0.038140000 | 0.513720000 |
| 0.066970000 | 0.048880000 | 0.596930000 |
| 0.236550000 | 0.074000000 | 0.596920000 |
| 0.325150000 | 0.146730000 | 0.513280000 |
| 0.387560000 | 0.238850000 | 0.596240000 |
| 0.400450000 | 0.325150000 | 0.680330000 |
| 0.363250000 | 0.381830000 | 0.762680000 |
| 0.287780000 | 0.392610000 | 0.679180000 |
| 0.105760000 | 0.286510000 | 0.679570000 |
| 0.194420000 | 0.358900000 | 0.762700000 |
| 0.045380000 | 0.193770000 | 0.763170000 |
| 0.030610000 | 0.105800000 | 0.680030000 |
| 0.143070000 | 0.038490000 | 0.680330000 |
| 0.067150000 | 0.049030000 | 0.763460000 |
| 0.236810000 | 0.073860000 | 0.763760000 |
| 0.325770000 | 0.145900000 | 0.680150000 |
| 0.387010000 | 0.238130000 | 0.763550000 |
| 0.400600000 | 0.325760000 | 0.845910000 |
| 0.363300000 | 0.382080000 | 0.928900000 |
| 0.287790000 | 0.393390000 | 0.845960000 |
| 0.105810000 | 0.286620000 | 0.846340000 |

|             |             |             |
|-------------|-------------|-------------|
| 0.194400000 | 0.358840000 | 0.929620000 |
| 0.045400000 | 0.193710000 | 0.929820000 |
| 0.030660000 | 0.105820000 | 0.846620000 |
| 0.143030000 | 0.038460000 | 0.846890000 |
| 0.066850000 | 0.048750000 | 0.930000000 |
| 0.236480000 | 0.074310000 | 0.930640000 |
| 0.325700000 | 0.146040000 | 0.847480000 |
| 0.387390000 | 0.239150000 | 0.930460000 |
| 0.399330000 | 0.354170000 | 0.093850000 |
| 0.342650000 | 0.392900000 | 0.012450000 |
| 0.162170000 | 0.339640000 | 0.013070000 |
| 0.257700000 | 0.387110000 | 0.096440000 |
| 0.079200000 | 0.256790000 | 0.096370000 |
| 0.032250000 | 0.161350000 | 0.013110000 |
| 0.087050000 | 0.036920000 | 0.013380000 |
| 0.034290000 | 0.079590000 | 0.096580000 |
| 0.172460000 | 0.042970000 | 0.097030000 |
| 0.268290000 | 0.094470000 | 0.014290000 |
| 0.402370000 | 0.272510000 | 0.013320000 |
| 0.349880000 | 0.178600000 | 0.097830000 |
| 0.415290000 | 0.372510000 | 0.256860000 |
| 0.343660000 | 0.392960000 | 0.179150000 |
| 0.162390000 | 0.338890000 | 0.179820000 |
| 0.258090000 | 0.385660000 | 0.263100000 |
| 0.078930000 | 0.256570000 | 0.263000000 |
| 0.031950000 | 0.161110000 | 0.179770000 |
| 0.086590000 | 0.036500000 | 0.180160000 |
| 0.034110000 | 0.079470000 | 0.263360000 |
| 0.172300000 | 0.042840000 | 0.263720000 |
| 0.267540000 | 0.095220000 | 0.180620000 |

|             |             |             |
|-------------|-------------|-------------|
| 0.406960000 | 0.274940000 | 0.181850000 |
| 0.349480000 | 0.178290000 | 0.263940000 |
| 0.405800000 | 0.359200000 | 0.433840000 |
| 0.344820000 | 0.392510000 | 0.346030000 |
| 0.162400000 | 0.338460000 | 0.346140000 |
| 0.257870000 | 0.385300000 | 0.428950000 |
| 0.078910000 | 0.256620000 | 0.429680000 |
| 0.031750000 | 0.161040000 | 0.346530000 |
| 0.086680000 | 0.036610000 | 0.346950000 |
| 0.034240000 | 0.079600000 | 0.430130000 |
| 0.172650000 | 0.043020000 | 0.430290000 |
| 0.268010000 | 0.094370000 | 0.346970000 |
| 0.418790000 | 0.269560000 | 0.347760000 |
| 0.352040000 | 0.176120000 | 0.430460000 |
| 0.395980000 | 0.350280000 | 0.597550000 |
| 0.342550000 | 0.390890000 | 0.512520000 |
| 0.162320000 | 0.338950000 | 0.512590000 |
| 0.257720000 | 0.387270000 | 0.595640000 |
| 0.079140000 | 0.256890000 | 0.596370000 |
| 0.031910000 | 0.161210000 | 0.513280000 |
| 0.087260000 | 0.037170000 | 0.513640000 |
| 0.034570000 | 0.079860000 | 0.596790000 |
| 0.173140000 | 0.043370000 | 0.596980000 |
| 0.268410000 | 0.093590000 | 0.513470000 |
| 0.403400000 | 0.271740000 | 0.513380000 |
| 0.352160000 | 0.175410000 | 0.596860000 |
| 0.395820000 | 0.351070000 | 0.763130000 |
| 0.342630000 | 0.392790000 | 0.679340000 |
| 0.162160000 | 0.339720000 | 0.679350000 |
| 0.257710000 | 0.388690000 | 0.762560000 |



|             |             |             |
|-------------|-------------|-------------|
| 0.079350000 | 0.257070000 | 0.763040000 |
| 0.032210000 | 0.161440000 | 0.679930000 |
| 0.087720000 | 0.037580000 | 0.680230000 |
| 0.034730000 | 0.079980000 | 0.763360000 |
| 0.173410000 | 0.043580000 | 0.763690000 |
| 0.268930000 | 0.092910000 | 0.680330000 |
| 0.400210000 | 0.270290000 | 0.680520000 |
| 0.352590000 | 0.174800000 | 0.763960000 |
| 0.396160000 | 0.351650000 | 0.928560000 |
| 0.342790000 | 0.393690000 | 0.845850000 |
| 0.162120000 | 0.339990000 | 0.846210000 |
| 0.257690000 | 0.388620000 | 0.929520000 |
| 0.079360000 | 0.257020000 | 0.929700000 |
| 0.032370000 | 0.161500000 | 0.846510000 |
| 0.087660000 | 0.037500000 | 0.846770000 |
| 0.034590000 | 0.079850000 | 0.929910000 |
| 0.173100000 | 0.043410000 | 0.930400000 |
| 0.268920000 | 0.093100000 | 0.847440000 |
| 0.400390000 | 0.270770000 | 0.846730000 |
| 0.352070000 | 0.175940000 | 0.931020000 |
| 0.579780000 | 0.438110000 | 0.209840000 |
| 0.578330000 | 0.391640000 | 0.151760000 |
| 0.497510000 | 0.421770000 | 0.222240000 |
| 0.560470000 | 0.399740000 | 0.342700000 |
| 0.454270000 | 0.353500000 | 0.349070000 |
| 0.496870000 | 0.324120000 | 0.199420000 |
| 0.615700000 | 0.477350000 | 0.193050000 |
| 0.615000000 | 0.388430000 | 0.162470000 |
| 0.577260000 | 0.401170000 | 0.084490000 |

(14) \*HN adsorption on Mn<sub>4</sub>/BNNT (6, 6) ( $G = -170149.2617$  eV)

1.0

|                |               |               |
|----------------|---------------|---------------|
| 26.4829998016  | 0.0000000000  | 0.0000000000  |
| -13.2414999008 | 22.9349505966 | 0.0000000000  |
| 0.0000000000   | 0.0000000000  | 14.7571001053 |

|    |    |    |   |
|----|----|----|---|
| B  | N  | Mn | H |
| 71 | 73 | 4  | 1 |

Direct

|             |             |             |
|-------------|-------------|-------------|
| 0.401800000 | 0.327770000 | 0.012020000 |
| 0.363580000 | 0.382340000 | 0.095460000 |
| 0.287180000 | 0.392980000 | 0.012970000 |
| 0.105420000 | 0.286640000 | 0.013410000 |
| 0.194070000 | 0.358350000 | 0.096740000 |
| 0.045090000 | 0.193640000 | 0.096840000 |
| 0.030690000 | 0.105890000 | 0.013660000 |
| 0.143160000 | 0.038860000 | 0.014090000 |
| 0.066860000 | 0.048810000 | 0.097190000 |
| 0.236510000 | 0.076220000 | 0.097950000 |
| 0.325180000 | 0.149010000 | 0.015150000 |
| 0.389000000 | 0.242310000 | 0.098210000 |
| 0.418220000 | 0.340390000 | 0.178120000 |
| 0.369160000 | 0.388230000 | 0.262000000 |
| 0.287580000 | 0.391620000 | 0.179720000 |
| 0.105370000 | 0.286250000 | 0.180140000 |
| 0.194500000 | 0.357370000 | 0.263390000 |
| 0.044750000 | 0.193400000 | 0.263510000 |
| 0.030390000 | 0.105640000 | 0.180370000 |
| 0.142750000 | 0.038600000 | 0.180890000 |
| 0.066690000 | 0.048670000 | 0.264040000 |
| 0.236400000 | 0.076170000 | 0.264540000 |
| 0.323840000 | 0.150630000 | 0.181830000 |

|             |             |             |
|-------------|-------------|-------------|
| 0.394400000 | 0.241500000 | 0.267250000 |
| 0.366700000 | 0.382530000 | 0.429930000 |
| 0.288360000 | 0.390390000 | 0.346310000 |
| 0.105260000 | 0.286020000 | 0.346630000 |
| 0.194470000 | 0.357110000 | 0.429530000 |
| 0.044710000 | 0.193450000 | 0.430210000 |
| 0.030310000 | 0.105610000 | 0.347140000 |
| 0.142840000 | 0.038570000 | 0.347630000 |
| 0.067050000 | 0.048990000 | 0.430810000 |
| 0.236850000 | 0.075160000 | 0.430790000 |
| 0.325320000 | 0.148970000 | 0.347820000 |
| 0.394290000 | 0.239470000 | 0.431090000 |
| 0.404840000 | 0.328220000 | 0.513920000 |
| 0.363010000 | 0.380930000 | 0.596610000 |
| 0.287510000 | 0.390640000 | 0.512670000 |
| 0.105340000 | 0.286260000 | 0.513180000 |
| 0.194230000 | 0.358230000 | 0.596110000 |
| 0.044990000 | 0.193700000 | 0.596890000 |
| 0.030560000 | 0.105830000 | 0.513850000 |
| 0.143380000 | 0.038870000 | 0.514230000 |
| 0.067570000 | 0.049430000 | 0.597420000 |
| 0.237220000 | 0.074490000 | 0.597540000 |
| 0.325820000 | 0.147130000 | 0.514040000 |
| 0.387740000 | 0.239320000 | 0.597100000 |
| 0.400390000 | 0.325680000 | 0.680790000 |
| 0.362940000 | 0.382190000 | 0.762970000 |
| 0.287450000 | 0.392860000 | 0.679390000 |
| 0.105430000 | 0.286660000 | 0.679860000 |
| 0.194030000 | 0.359170000 | 0.762920000 |
| 0.045270000 | 0.193900000 | 0.763540000 |

|             |             |             |
|-------------|-------------|-------------|
| 0.030870000 | 0.106060000 | 0.680470000 |
| 0.143750000 | 0.039150000 | 0.680880000 |
| 0.067740000 | 0.049580000 | 0.763940000 |
| 0.237480000 | 0.074450000 | 0.764430000 |
| 0.326400000 | 0.146400000 | 0.680880000 |
| 0.387360000 | 0.238800000 | 0.764160000 |
| 0.400490000 | 0.326290000 | 0.846290000 |
| 0.362690000 | 0.382280000 | 0.929140000 |
| 0.287360000 | 0.393760000 | 0.846160000 |
| 0.105460000 | 0.286820000 | 0.846630000 |
| 0.193940000 | 0.359230000 | 0.929840000 |
| 0.045310000 | 0.193870000 | 0.930190000 |
| 0.030920000 | 0.106100000 | 0.847040000 |
| 0.143710000 | 0.039180000 | 0.847470000 |
| 0.067390000 | 0.049270000 | 0.930480000 |
| 0.237190000 | 0.075190000 | 0.931320000 |
| 0.326400000 | 0.146740000 | 0.848150000 |
| 0.388050000 | 0.239980000 | 0.930880000 |
| 0.398030000 | 0.353900000 | 0.094170000 |
| 0.341990000 | 0.393130000 | 0.012610000 |
| 0.161740000 | 0.340000000 | 0.013340000 |
| 0.257270000 | 0.387650000 | 0.096700000 |
| 0.078960000 | 0.256950000 | 0.096700000 |
| 0.032280000 | 0.161520000 | 0.013480000 |
| 0.087660000 | 0.037560000 | 0.013880000 |
| 0.034580000 | 0.079900000 | 0.097010000 |
| 0.173230000 | 0.044050000 | 0.097620000 |
| 0.269030000 | 0.095600000 | 0.014950000 |
| 0.403150000 | 0.273460000 | 0.013700000 |
| 0.350730000 | 0.179790000 | 0.098430000 |

|             |             |             |
|-------------|-------------|-------------|
| 0.416380000 | 0.374910000 | 0.256420000 |
| 0.343350000 | 0.393680000 | 0.179320000 |
| 0.162000000 | 0.339190000 | 0.180150000 |
| 0.257760000 | 0.386080000 | 0.263400000 |
| 0.078680000 | 0.256690000 | 0.263330000 |
| 0.031940000 | 0.161260000 | 0.180150000 |
| 0.087170000 | 0.037140000 | 0.180660000 |
| 0.034390000 | 0.079760000 | 0.263800000 |
| 0.173070000 | 0.043910000 | 0.264230000 |
| 0.268300000 | 0.096750000 | 0.181240000 |
| 0.409590000 | 0.276400000 | 0.182110000 |
| 0.350540000 | 0.179700000 | 0.264600000 |
| 0.405490000 | 0.359250000 | 0.433970000 |
| 0.344710000 | 0.392980000 | 0.346110000 |
| 0.162060000 | 0.338640000 | 0.346450000 |
| 0.257560000 | 0.385380000 | 0.429150000 |
| 0.078630000 | 0.256730000 | 0.430000000 |
| 0.031710000 | 0.161160000 | 0.346910000 |
| 0.087320000 | 0.037270000 | 0.347440000 |
| 0.034590000 | 0.079920000 | 0.430580000 |
| 0.173410000 | 0.043880000 | 0.430770000 |
| 0.268780000 | 0.095550000 | 0.347460000 |
| 0.419830000 | 0.270010000 | 0.349410000 |
| 0.352770000 | 0.176600000 | 0.431280000 |
| 0.395860000 | 0.350730000 | 0.597870000 |
| 0.342330000 | 0.391100000 | 0.512620000 |
| 0.162010000 | 0.339070000 | 0.512840000 |
| 0.257410000 | 0.387410000 | 0.595790000 |
| 0.078860000 | 0.257000000 | 0.596680000 |
| 0.031870000 | 0.161320000 | 0.513660000 |

|             |             |             |
|-------------|-------------|-------------|
| 0.087970000 | 0.037850000 | 0.514120000 |
| 0.034980000 | 0.080210000 | 0.597240000 |
| 0.173830000 | 0.044020000 | 0.597520000 |
| 0.269120000 | 0.094060000 | 0.514070000 |
| 0.403330000 | 0.272160000 | 0.514230000 |
| 0.352770000 | 0.175900000 | 0.597600000 |
| 0.395610000 | 0.351550000 | 0.763490000 |
| 0.342340000 | 0.393100000 | 0.679520000 |
| 0.161820000 | 0.339910000 | 0.679560000 |
| 0.257330000 | 0.388990000 | 0.762700000 |
| 0.079080000 | 0.257210000 | 0.763350000 |
| 0.032200000 | 0.161570000 | 0.680310000 |
| 0.088420000 | 0.038240000 | 0.680730000 |
| 0.035150000 | 0.080340000 | 0.763790000 |
| 0.174100000 | 0.044260000 | 0.764280000 |
| 0.269610000 | 0.093380000 | 0.680980000 |
| 0.400310000 | 0.270900000 | 0.681120000 |
| 0.353210000 | 0.175460000 | 0.764600000 |
| 0.395490000 | 0.351820000 | 0.928920000 |
| 0.342310000 | 0.393960000 | 0.846050000 |
| 0.161720000 | 0.340280000 | 0.846420000 |
| 0.257240000 | 0.389080000 | 0.929680000 |
| 0.079100000 | 0.257190000 | 0.930020000 |
| 0.032390000 | 0.161660000 | 0.846890000 |
| 0.088320000 | 0.038150000 | 0.847280000 |
| 0.034950000 | 0.080180000 | 0.930340000 |
| 0.173830000 | 0.044270000 | 0.931010000 |
| 0.269630000 | 0.093830000 | 0.848110000 |
| 0.400650000 | 0.271500000 | 0.847180000 |
| 0.352850000 | 0.176790000 | 0.931610000 |

|             |             |             |
|-------------|-------------|-------------|
| 0.564470000 | 0.409690000 | 0.202490000 |
| 0.499430000 | 0.423540000 | 0.221490000 |
| 0.558840000 | 0.392400000 | 0.333410000 |
| 0.453230000 | 0.353090000 | 0.349310000 |
| 0.499380000 | 0.330440000 | 0.184450000 |
| 0.602070000 | 0.432750000 | 0.165720000 |

(15) \*H<sub>2</sub>N adsorption on Mn<sub>4</sub>/BNNT (6, 6) ( $G = -170165.3597$  eV)

1.0

|                |               |               |
|----------------|---------------|---------------|
| 26.4829998016  | 0.0000000000  | 0.0000000000  |
| -13.2414999008 | 22.9349505966 | 0.0000000000  |
| 0.0000000000   | 0.0000000000  | 14.7571001053 |

|    |    |    |   |
|----|----|----|---|
| B  | N  | Mn | H |
| 71 | 73 | 4  | 2 |

Direct

|             |             |             |
|-------------|-------------|-------------|
| 0.402880000 | 0.323230000 | 0.012420000 |
| 0.366930000 | 0.379760000 | 0.095640000 |
| 0.291850000 | 0.392370000 | 0.013060000 |
| 0.109560000 | 0.289450000 | 0.013630000 |
| 0.199100000 | 0.359510000 | 0.096910000 |
| 0.047350000 | 0.196930000 | 0.097090000 |
| 0.030910000 | 0.108470000 | 0.013940000 |
| 0.140340000 | 0.037920000 | 0.014490000 |
| 0.065220000 | 0.049790000 | 0.097540000 |
| 0.233460000 | 0.073320000 | 0.098430000 |
| 0.322910000 | 0.144490000 | 0.015660000 |
| 0.388230000 | 0.237190000 | 0.098980000 |
| 0.419630000 | 0.335640000 | 0.178750000 |
| 0.373370000 | 0.386110000 | 0.262100000 |
| 0.292350000 | 0.391040000 | 0.179900000 |
| 0.109490000 | 0.289040000 | 0.180330000 |

|             |             |             |
|-------------|-------------|-------------|
| 0.199480000 | 0.358510000 | 0.263520000 |
| 0.046990000 | 0.196710000 | 0.263750000 |
| 0.030610000 | 0.108240000 | 0.180660000 |
| 0.139960000 | 0.037710000 | 0.181300000 |
| 0.065080000 | 0.049700000 | 0.264390000 |
| 0.233400000 | 0.073290000 | 0.265000000 |
| 0.321760000 | 0.146170000 | 0.182440000 |
| 0.394790000 | 0.236240000 | 0.267950000 |
| 0.369390000 | 0.379160000 | 0.429940000 |
| 0.293060000 | 0.389820000 | 0.346350000 |
| 0.109340000 | 0.288830000 | 0.346800000 |
| 0.199390000 | 0.358290000 | 0.429630000 |
| 0.046960000 | 0.196790000 | 0.430440000 |
| 0.030570000 | 0.108250000 | 0.347430000 |
| 0.140100000 | 0.037730000 | 0.348030000 |
| 0.065480000 | 0.050060000 | 0.431150000 |
| 0.233870000 | 0.072310000 | 0.431170000 |
| 0.323480000 | 0.144240000 | 0.348190000 |
| 0.394500000 | 0.233670000 | 0.431220000 |
| 0.405290000 | 0.322530000 | 0.513800000 |
| 0.365930000 | 0.377610000 | 0.596590000 |
| 0.291950000 | 0.389890000 | 0.512800000 |
| 0.109390000 | 0.289130000 | 0.513360000 |
| 0.199100000 | 0.359500000 | 0.596260000 |
| 0.047260000 | 0.197050000 | 0.597130000 |
| 0.030860000 | 0.108490000 | 0.514140000 |
| 0.140650000 | 0.038030000 | 0.514590000 |
| 0.066000000 | 0.050480000 | 0.597740000 |
| 0.234180000 | 0.071620000 | 0.597940000 |
| 0.323900000 | 0.142260000 | 0.514440000 |



|             |             |             |
|-------------|-------------|-------------|
| 0.387560000 | 0.233840000 | 0.597460000 |
| 0.401640000 | 0.320890000 | 0.680850000 |
| 0.366170000 | 0.379210000 | 0.763000000 |
| 0.291970000 | 0.392060000 | 0.679480000 |
| 0.109480000 | 0.289530000 | 0.680070000 |
| 0.198960000 | 0.360430000 | 0.763070000 |
| 0.047550000 | 0.197220000 | 0.763790000 |
| 0.031150000 | 0.108710000 | 0.680750000 |
| 0.140980000 | 0.038240000 | 0.681240000 |
| 0.066130000 | 0.050560000 | 0.764260000 |
| 0.234370000 | 0.071570000 | 0.764840000 |
| 0.324320000 | 0.141600000 | 0.681360000 |
| 0.386920000 | 0.233530000 | 0.764580000 |
| 0.401930000 | 0.321820000 | 0.846480000 |
| 0.366090000 | 0.379620000 | 0.929240000 |
| 0.291990000 | 0.393050000 | 0.846240000 |
| 0.109560000 | 0.289660000 | 0.846840000 |
| 0.198930000 | 0.360460000 | 0.930000000 |
| 0.047590000 | 0.197160000 | 0.930440000 |
| 0.031170000 | 0.108690000 | 0.847320000 |
| 0.140890000 | 0.038220000 | 0.847840000 |
| 0.065740000 | 0.050230000 | 0.930810000 |
| 0.234070000 | 0.072290000 | 0.931750000 |
| 0.324150000 | 0.142100000 | 0.848630000 |
| 0.387470000 | 0.234830000 | 0.931350000 |
| 0.399660000 | 0.349580000 | 0.094580000 |
| 0.346020000 | 0.391250000 | 0.012650000 |
| 0.166700000 | 0.341790000 | 0.013520000 |
| 0.262230000 | 0.387610000 | 0.096860000 |
| 0.082560000 | 0.260160000 | 0.096900000 |

|             |             |             |
|-------------|-------------|-------------|
| 0.033850000 | 0.164730000 | 0.013730000 |
| 0.085450000 | 0.037870000 | 0.014240000 |
| 0.034140000 | 0.082090000 | 0.097310000 |
| 0.170200000 | 0.042520000 | 0.098020000 |
| 0.266010000 | 0.092030000 | 0.015390000 |
| 0.403090000 | 0.268340000 | 0.014230000 |
| 0.348960000 | 0.174920000 | 0.098950000 |
| 0.419950000 | 0.371740000 | 0.256390000 |
| 0.347620000 | 0.392020000 | 0.179540000 |
| 0.166950000 | 0.340900000 | 0.180300000 |
| 0.262660000 | 0.386080000 | 0.263490000 |
| 0.082220000 | 0.259920000 | 0.263520000 |
| 0.033480000 | 0.164480000 | 0.180400000 |
| 0.084990000 | 0.037500000 | 0.181020000 |
| 0.033980000 | 0.082000000 | 0.264110000 |
| 0.170070000 | 0.042430000 | 0.264640000 |
| 0.265380000 | 0.093190000 | 0.181700000 |
| 0.409920000 | 0.271290000 | 0.182760000 |
| 0.349230000 | 0.174790000 | 0.265030000 |
| 0.405720000 | 0.353220000 | 0.433640000 |
| 0.348840000 | 0.391210000 | 0.346080000 |
| 0.166960000 | 0.340340000 | 0.346560000 |
| 0.262380000 | 0.385330000 | 0.429200000 |
| 0.082160000 | 0.259990000 | 0.430190000 |
| 0.033260000 | 0.164410000 | 0.347160000 |
| 0.085180000 | 0.037680000 | 0.347800000 |
| 0.034210000 | 0.082190000 | 0.430880000 |
| 0.170460000 | 0.042450000 | 0.431150000 |
| 0.265900000 | 0.092000000 | 0.347850000 |
| 0.421220000 | 0.263990000 | 0.349990000 |

|             |             |             |
|-------------|-------------|-------------|
| 0.351530000 | 0.171140000 | 0.431690000 |
| 0.397360000 | 0.345950000 | 0.597750000 |
| 0.345920000 | 0.388720000 | 0.512770000 |
| 0.166860000 | 0.340890000 | 0.512970000 |
| 0.262200000 | 0.387410000 | 0.595940000 |
| 0.082390000 | 0.260280000 | 0.596880000 |
| 0.033460000 | 0.164600000 | 0.513920000 |
| 0.085860000 | 0.038270000 | 0.514450000 |
| 0.034610000 | 0.082470000 | 0.597530000 |
| 0.170850000 | 0.042540000 | 0.597900000 |
| 0.266170000 | 0.090510000 | 0.514490000 |
| 0.403850000 | 0.266560000 | 0.514510000 |
| 0.351400000 | 0.170510000 | 0.598070000 |
| 0.397700000 | 0.347370000 | 0.763540000 |
| 0.346060000 | 0.390690000 | 0.679570000 |
| 0.166660000 | 0.341800000 | 0.679730000 |
| 0.262190000 | 0.388930000 | 0.762830000 |
| 0.082640000 | 0.260460000 | 0.763570000 |
| 0.033810000 | 0.164830000 | 0.680560000 |
| 0.086270000 | 0.038600000 | 0.681050000 |
| 0.034740000 | 0.082560000 | 0.764070000 |
| 0.171060000 | 0.042700000 | 0.764660000 |
| 0.266590000 | 0.089820000 | 0.681430000 |
| 0.400500000 | 0.265590000 | 0.681440000 |
| 0.351610000 | 0.170280000 | 0.765120000 |
| 0.397740000 | 0.347930000 | 0.929130000 |
| 0.346250000 | 0.391830000 | 0.846080000 |
| 0.166620000 | 0.342150000 | 0.846610000 |
| 0.262170000 | 0.389090000 | 0.929780000 |
| 0.082700000 | 0.260410000 | 0.930240000 |

|             |             |             |
|-------------|-------------|-------------|
| 0.033990000 | 0.164890000 | 0.847140000 |
| 0.086130000 | 0.038450000 | 0.847610000 |
| 0.034510000 | 0.082370000 | 0.930630000 |
| 0.170760000 | 0.042670000 | 0.931400000 |
| 0.266550000 | 0.090310000 | 0.848550000 |
| 0.400830000 | 0.266410000 | 0.847590000 |
| 0.351050000 | 0.171800000 | 0.932120000 |
| 0.553040000 | 0.406970000 | 0.122450000 |
| 0.503130000 | 0.417880000 | 0.217060000 |
| 0.560120000 | 0.380710000 | 0.335920000 |
| 0.454580000 | 0.348080000 | 0.350000000 |
| 0.499830000 | 0.325330000 | 0.168250000 |
| 0.597000000 | 0.425480000 | 0.132370000 |
| 0.546560000 | 0.414470000 | 0.056250000 |

(16) \*H<sub>3</sub>N adsorption on Mn<sub>4</sub>/BNNT (6, 6) ( $G = -170181.0171$  eV)

1.0

|                |               |               |
|----------------|---------------|---------------|
| 26.4829998016  | 0.0000000000  | 0.0000000000  |
| -13.2414999008 | 22.9349505966 | 0.0000000000  |
| 0.0000000000   | 0.0000000000  | 14.7571001053 |

|    |    |    |   |
|----|----|----|---|
| B  | N  | Mn | H |
| 71 | 73 | 4  | 3 |

Direct

|             |             |             |
|-------------|-------------|-------------|
| 0.405440000 | 0.329540000 | 0.013830000 |
| 0.367600000 | 0.384080000 | 0.097210000 |
| 0.290820000 | 0.394420000 | 0.014650000 |
| 0.108520000 | 0.289780000 | 0.015040000 |
| 0.197730000 | 0.360500000 | 0.098340000 |
| 0.047100000 | 0.197090000 | 0.098460000 |
| 0.031580000 | 0.108950000 | 0.015260000 |
| 0.142730000 | 0.040440000 | 0.015570000 |

|             |             |             |
|-------------|-------------|-------------|
| 0.066920000 | 0.051130000 | 0.098770000 |
| 0.235910000 | 0.076980000 | 0.099470000 |
| 0.324770000 | 0.149730000 | 0.016850000 |
| 0.388530000 | 0.242900000 | 0.100790000 |
| 0.420670000 | 0.340440000 | 0.180960000 |
| 0.372330000 | 0.389190000 | 0.264040000 |
| 0.291080000 | 0.392890000 | 0.181330000 |
| 0.108510000 | 0.289420000 | 0.181740000 |
| 0.198160000 | 0.359670000 | 0.264980000 |
| 0.046820000 | 0.196900000 | 0.265110000 |
| 0.031350000 | 0.108740000 | 0.181970000 |
| 0.142280000 | 0.040020000 | 0.182480000 |
| 0.066770000 | 0.051010000 | 0.265630000 |
| 0.235870000 | 0.076830000 | 0.266190000 |
| 0.323180000 | 0.151010000 | 0.183480000 |
| 0.394250000 | 0.241600000 | 0.268710000 |
| 0.369940000 | 0.383890000 | 0.431730000 |
| 0.291960000 | 0.392350000 | 0.348010000 |
| 0.108410000 | 0.289270000 | 0.348230000 |
| 0.198040000 | 0.359650000 | 0.431130000 |
| 0.046790000 | 0.196990000 | 0.431790000 |
| 0.031270000 | 0.108740000 | 0.348710000 |
| 0.142450000 | 0.040160000 | 0.349260000 |
| 0.067120000 | 0.051390000 | 0.432380000 |
| 0.236460000 | 0.076370000 | 0.432400000 |
| 0.325220000 | 0.149310000 | 0.349340000 |
| 0.396630000 | 0.239800000 | 0.431510000 |
| 0.406970000 | 0.328610000 | 0.514830000 |
| 0.365710000 | 0.381710000 | 0.598110000 |
| 0.290890000 | 0.392530000 | 0.514330000 |

|             |             |             |
|-------------|-------------|-------------|
| 0.108450000 | 0.289550000 | 0.514780000 |
| 0.197730000 | 0.360760000 | 0.597770000 |
| 0.047040000 | 0.197230000 | 0.598470000 |
| 0.031470000 | 0.108960000 | 0.515410000 |
| 0.143110000 | 0.040800000 | 0.515820000 |
| 0.067630000 | 0.051880000 | 0.598970000 |
| 0.236980000 | 0.076180000 | 0.599010000 |
| 0.326120000 | 0.147970000 | 0.515270000 |
| 0.389650000 | 0.239750000 | 0.598050000 |
| 0.402700000 | 0.326090000 | 0.682090000 |
| 0.365960000 | 0.383220000 | 0.764450000 |
| 0.290790000 | 0.394540000 | 0.681040000 |
| 0.108510000 | 0.289910000 | 0.681500000 |
| 0.197570000 | 0.361560000 | 0.764610000 |
| 0.047270000 | 0.197380000 | 0.765140000 |
| 0.031710000 | 0.109170000 | 0.682030000 |
| 0.143540000 | 0.041200000 | 0.682390000 |
| 0.067790000 | 0.052010000 | 0.765480000 |
| 0.237200000 | 0.076080000 | 0.765860000 |
| 0.326750000 | 0.147210000 | 0.682250000 |
| 0.389000000 | 0.239190000 | 0.765570000 |
| 0.403240000 | 0.327140000 | 0.847730000 |
| 0.366240000 | 0.383790000 | 0.930700000 |
| 0.290840000 | 0.395330000 | 0.847810000 |
| 0.108550000 | 0.290000000 | 0.848280000 |
| 0.197580000 | 0.361450000 | 0.931530000 |
| 0.047290000 | 0.197310000 | 0.931800000 |
| 0.031760000 | 0.109170000 | 0.848620000 |
| 0.143420000 | 0.041080000 | 0.848930000 |
| 0.067420000 | 0.051640000 | 0.932020000 |

|             |             |             |
|-------------|-------------|-------------|
| 0.236740000 | 0.076470000 | 0.932760000 |
| 0.326420000 | 0.147570000 | 0.849680000 |
| 0.389160000 | 0.240480000 | 0.932690000 |
| 0.403170000 | 0.356670000 | 0.095650000 |
| 0.345730000 | 0.394690000 | 0.014260000 |
| 0.165330000 | 0.342500000 | 0.014970000 |
| 0.260850000 | 0.389130000 | 0.098260000 |
| 0.081730000 | 0.260340000 | 0.098320000 |
| 0.033850000 | 0.164900000 | 0.015090000 |
| 0.087460000 | 0.039610000 | 0.015400000 |
| 0.035180000 | 0.082770000 | 0.098600000 |
| 0.172630000 | 0.045200000 | 0.099100000 |
| 0.268520000 | 0.096460000 | 0.016450000 |
| 0.405490000 | 0.274220000 | 0.015640000 |
| 0.350120000 | 0.180350000 | 0.100090000 |
| 0.418600000 | 0.375110000 | 0.258500000 |
| 0.346570000 | 0.394560000 | 0.180900000 |
| 0.165610000 | 0.341700000 | 0.181730000 |
| 0.261320000 | 0.387840000 | 0.264970000 |
| 0.081470000 | 0.260130000 | 0.264940000 |
| 0.033570000 | 0.164670000 | 0.181760000 |
| 0.086980000 | 0.039160000 | 0.182230000 |
| 0.035020000 | 0.082670000 | 0.265390000 |
| 0.172500000 | 0.045050000 | 0.265840000 |
| 0.267670000 | 0.097080000 | 0.182750000 |
| 0.407390000 | 0.276220000 | 0.184440000 |
| 0.350070000 | 0.179750000 | 0.266090000 |
| 0.408010000 | 0.359990000 | 0.435520000 |
| 0.348160000 | 0.394870000 | 0.347970000 |
| 0.165610000 | 0.341310000 | 0.348030000 |

|             |             |             |
|-------------|-------------|-------------|
| 0.261070000 | 0.387590000 | 0.430790000 |
| 0.081440000 | 0.260210000 | 0.431610000 |
| 0.033380000 | 0.164620000 | 0.348510000 |
| 0.087150000 | 0.039350000 | 0.349050000 |
| 0.035160000 | 0.082830000 | 0.432160000 |
| 0.173010000 | 0.045460000 | 0.432410000 |
| 0.268340000 | 0.096100000 | 0.349060000 |
| 0.422710000 | 0.269900000 | 0.349610000 |
| 0.353310000 | 0.177050000 | 0.432450000 |
| 0.397930000 | 0.350890000 | 0.599250000 |
| 0.345390000 | 0.392470000 | 0.514370000 |
| 0.165490000 | 0.341850000 | 0.514460000 |
| 0.260840000 | 0.389460000 | 0.597510000 |
| 0.081650000 | 0.260480000 | 0.598290000 |
| 0.033510000 | 0.164800000 | 0.515250000 |
| 0.087830000 | 0.040040000 | 0.515710000 |
| 0.035470000 | 0.083100000 | 0.598810000 |
| 0.173590000 | 0.045990000 | 0.599080000 |
| 0.268860000 | 0.095470000 | 0.515570000 |
| 0.406050000 | 0.272620000 | 0.515120000 |
| 0.353530000 | 0.176360000 | 0.598920000 |
| 0.398340000 | 0.352230000 | 0.764880000 |
| 0.345390000 | 0.394230000 | 0.681170000 |
| 0.165290000 | 0.342660000 | 0.681250000 |
| 0.260840000 | 0.390850000 | 0.764440000 |
| 0.081860000 | 0.260640000 | 0.764980000 |
| 0.033800000 | 0.165020000 | 0.681900000 |
| 0.088300000 | 0.040480000 | 0.682280000 |
| 0.035620000 | 0.083200000 | 0.765360000 |
| 0.173840000 | 0.046170000 | 0.765760000 |



|             |             |             |
|-------------|-------------|-------------|
| 0.269400000 | 0.094880000 | 0.682470000 |
| 0.402520000 | 0.271240000 | 0.682460000 |
| 0.353840000 | 0.175910000 | 0.766190000 |
| 0.399030000 | 0.353220000 | 0.930340000 |
| 0.345700000 | 0.395300000 | 0.847630000 |
| 0.165270000 | 0.342900000 | 0.848130000 |
| 0.260850000 | 0.390680000 | 0.931390000 |
| 0.081860000 | 0.260570000 | 0.931650000 |
| 0.033950000 | 0.165070000 | 0.848490000 |
| 0.088170000 | 0.040320000 | 0.848790000 |
| 0.035460000 | 0.083040000 | 0.931920000 |
| 0.173410000 | 0.045840000 | 0.932460000 |
| 0.269300000 | 0.095160000 | 0.849620000 |
| 0.402930000 | 0.272030000 | 0.848810000 |
| 0.352880000 | 0.177450000 | 0.933360000 |
| 0.534470000 | 0.315860000 | 0.076900000 |
| 0.501260000 | 0.424630000 | 0.218400000 |
| 0.568630000 | 0.408090000 | 0.319790000 |
| 0.458110000 | 0.355360000 | 0.350840000 |
| 0.501950000 | 0.328750000 | 0.203420000 |
| 0.545670000 | 0.284030000 | 0.074930000 |
| 0.501070000 | 0.304660000 | 0.031090000 |
| 0.569800000 | 0.353840000 | 0.055400000 |

(17) the second  $^*H_3N$  desorption on  $Mn_4/BNNT$  (6, 6) ( $G = -170179.4254$  eV)

1.0

|                |               |               |   |
|----------------|---------------|---------------|---|
| 26.4829998016  | 0.0000000000  | 0.0000000000  |   |
| -13.2414999008 | 22.9349505966 | 0.0000000000  |   |
| 0.0000000000   | 0.0000000000  | 14.7571001053 |   |
| B              | N             | Mn            | H |
| 71             | 73            | 4             | 3 |

Direct

|             |             |             |
|-------------|-------------|-------------|
| 0.405950000 | 0.327830000 | 0.013470000 |
| 0.369030000 | 0.383190000 | 0.097470000 |
| 0.293180000 | 0.395110000 | 0.014970000 |
| 0.110630000 | 0.292390000 | 0.015050000 |
| 0.200200000 | 0.362220000 | 0.098510000 |
| 0.048290000 | 0.200040000 | 0.098450000 |
| 0.031420000 | 0.111410000 | 0.014990000 |
| 0.141160000 | 0.041090000 | 0.015120000 |
| 0.066090000 | 0.053000000 | 0.098430000 |
| 0.234250000 | 0.076180000 | 0.098800000 |
| 0.323670000 | 0.147660000 | 0.015800000 |
| 0.388710000 | 0.240270000 | 0.098830000 |
| 0.419960000 | 0.337290000 | 0.180410000 |
| 0.373050000 | 0.387370000 | 0.264510000 |
| 0.293230000 | 0.393320000 | 0.181600000 |
| 0.110510000 | 0.292050000 | 0.181820000 |
| 0.200540000 | 0.361370000 | 0.265130000 |
| 0.047750000 | 0.199780000 | 0.265050000 |
| 0.031180000 | 0.111230000 | 0.181850000 |
| 0.140750000 | 0.040810000 | 0.181960000 |
| 0.065750000 | 0.052770000 | 0.265230000 |
| 0.234120000 | 0.076330000 | 0.265560000 |
| 0.322390000 | 0.148990000 | 0.182540000 |
| 0.393090000 | 0.239500000 | 0.267680000 |
| 0.372010000 | 0.384720000 | 0.432260000 |
| 0.294120000 | 0.393120000 | 0.348250000 |
| 0.110410000 | 0.291890000 | 0.348280000 |
| 0.200520000 | 0.361520000 | 0.431290000 |
| 0.047850000 | 0.199860000 | 0.431700000 |

|             |             |             |
|-------------|-------------|-------------|
| 0.031050000 | 0.111190000 | 0.348470000 |
| 0.140710000 | 0.040810000 | 0.348710000 |
| 0.065880000 | 0.052920000 | 0.431970000 |
| 0.234400000 | 0.076050000 | 0.431860000 |
| 0.323570000 | 0.148170000 | 0.348830000 |
| 0.394370000 | 0.239020000 | 0.431240000 |
| 0.408040000 | 0.328730000 | 0.515460000 |
| 0.367990000 | 0.382790000 | 0.598580000 |
| 0.293380000 | 0.393970000 | 0.514610000 |
| 0.110580000 | 0.292180000 | 0.514830000 |
| 0.200320000 | 0.362680000 | 0.597940000 |
| 0.048200000 | 0.200110000 | 0.598360000 |
| 0.031340000 | 0.111400000 | 0.515170000 |
| 0.141140000 | 0.041190000 | 0.515320000 |
| 0.066330000 | 0.053300000 | 0.598620000 |
| 0.234830000 | 0.075760000 | 0.598440000 |
| 0.324080000 | 0.147290000 | 0.514770000 |
| 0.388420000 | 0.238750000 | 0.597740000 |
| 0.403410000 | 0.325610000 | 0.682310000 |
| 0.368020000 | 0.383700000 | 0.764840000 |
| 0.293360000 | 0.395960000 | 0.681370000 |
| 0.110710000 | 0.292520000 | 0.681530000 |
| 0.200200000 | 0.363440000 | 0.764800000 |
| 0.048380000 | 0.200240000 | 0.765020000 |
| 0.031620000 | 0.111620000 | 0.681800000 |
| 0.141570000 | 0.041500000 | 0.681930000 |
| 0.066590000 | 0.053510000 | 0.765170000 |
| 0.235120000 | 0.075430000 | 0.765210000 |
| 0.324830000 | 0.146190000 | 0.681560000 |
| 0.387950000 | 0.237760000 | 0.765050000 |

|             |             |             |
|-------------|-------------|-------------|
| 0.403800000 | 0.326120000 | 0.847750000 |
| 0.368130000 | 0.383670000 | 0.931010000 |
| 0.293370000 | 0.396430000 | 0.848160000 |
| 0.110730000 | 0.292600000 | 0.848290000 |
| 0.200170000 | 0.363240000 | 0.931700000 |
| 0.048350000 | 0.200200000 | 0.931650000 |
| 0.031640000 | 0.111630000 | 0.848390000 |
| 0.141620000 | 0.041480000 | 0.848490000 |
| 0.066450000 | 0.053350000 | 0.931710000 |
| 0.234860000 | 0.075630000 | 0.932070000 |
| 0.324840000 | 0.146020000 | 0.848810000 |
| 0.388270000 | 0.238560000 | 0.931860000 |
| 0.404020000 | 0.355090000 | 0.095830000 |
| 0.347710000 | 0.394570000 | 0.014710000 |
| 0.167850000 | 0.344560000 | 0.015090000 |
| 0.263290000 | 0.390090000 | 0.098540000 |
| 0.083560000 | 0.263200000 | 0.098310000 |
| 0.034390000 | 0.167740000 | 0.015010000 |
| 0.086280000 | 0.041100000 | 0.015070000 |
| 0.034740000 | 0.085070000 | 0.098370000 |
| 0.170970000 | 0.045560000 | 0.098620000 |
| 0.266800000 | 0.095070000 | 0.015700000 |
| 0.403890000 | 0.271850000 | 0.014780000 |
| 0.349730000 | 0.177830000 | 0.099150000 |
| 0.417710000 | 0.370760000 | 0.259170000 |
| 0.348170000 | 0.393720000 | 0.181310000 |
| 0.168030000 | 0.343760000 | 0.181860000 |
| 0.263650000 | 0.388740000 | 0.265180000 |
| 0.083200000 | 0.262990000 | 0.264970000 |
| 0.034270000 | 0.167550000 | 0.181600000 |

|             |             |             |
|-------------|-------------|-------------|
| 0.085830000 | 0.040710000 | 0.181830000 |
| 0.034610000 | 0.085010000 | 0.265110000 |
| 0.170790000 | 0.045500000 | 0.265340000 |
| 0.266140000 | 0.095870000 | 0.182150000 |
| 0.408460000 | 0.273690000 | 0.182820000 |
| 0.349310000 | 0.177820000 | 0.265360000 |
| 0.410450000 | 0.361140000 | 0.436420000 |
| 0.349930000 | 0.394720000 | 0.348230000 |
| 0.168050000 | 0.343370000 | 0.348190000 |
| 0.263560000 | 0.388980000 | 0.431030000 |
| 0.083270000 | 0.263060000 | 0.431660000 |
| 0.034050000 | 0.167480000 | 0.348390000 |
| 0.085750000 | 0.040670000 | 0.348600000 |
| 0.034640000 | 0.085070000 | 0.431870000 |
| 0.171020000 | 0.045670000 | 0.431910000 |
| 0.266470000 | 0.095460000 | 0.348580000 |
| 0.419720000 | 0.269230000 | 0.348790000 |
| 0.351360000 | 0.176420000 | 0.431890000 |
| 0.399540000 | 0.351260000 | 0.599680000 |
| 0.347880000 | 0.393800000 | 0.514740000 |
| 0.168040000 | 0.343980000 | 0.514630000 |
| 0.263450000 | 0.391020000 | 0.597780000 |
| 0.083590000 | 0.263310000 | 0.598320000 |
| 0.034270000 | 0.167650000 | 0.515140000 |
| 0.086200000 | 0.041090000 | 0.515300000 |
| 0.034960000 | 0.085310000 | 0.598560000 |
| 0.171480000 | 0.046000000 | 0.598560000 |
| 0.266760000 | 0.095000000 | 0.514990000 |
| 0.405040000 | 0.271840000 | 0.514820000 |
| 0.351630000 | 0.175500000 | 0.598250000 |

|             |             |             |
|-------------|-------------|-------------|
| 0.399530000 | 0.351880000 | 0.765100000 |
| 0.347830000 | 0.395360000 | 0.681590000 |
| 0.167910000 | 0.344770000 | 0.681410000 |
| 0.263460000 | 0.392300000 | 0.764770000 |
| 0.083790000 | 0.263450000 | 0.764980000 |
| 0.034550000 | 0.167860000 | 0.681780000 |
| 0.086690000 | 0.041520000 | 0.681930000 |
| 0.035130000 | 0.085440000 | 0.765150000 |
| 0.171780000 | 0.046150000 | 0.765240000 |
| 0.267290000 | 0.094170000 | 0.681760000 |
| 0.401860000 | 0.270120000 | 0.682080000 |
| 0.352210000 | 0.174520000 | 0.765350000 |
| 0.400220000 | 0.352430000 | 0.930470000 |
| 0.347960000 | 0.395870000 | 0.848100000 |
| 0.167860000 | 0.344960000 | 0.848270000 |
| 0.263420000 | 0.391880000 | 0.931720000 |
| 0.083730000 | 0.263380000 | 0.931630000 |
| 0.034520000 | 0.167870000 | 0.848390000 |
| 0.086760000 | 0.041560000 | 0.848470000 |
| 0.035040000 | 0.085330000 | 0.931700000 |
| 0.171540000 | 0.045930000 | 0.931940000 |
| 0.267330000 | 0.094050000 | 0.848820000 |
| 0.401970000 | 0.270350000 | 0.848260000 |
| 0.351650000 | 0.175470000 | 0.932390000 |
| 0.898350000 | 0.055450000 | 0.083290000 |
| 0.501060000 | 0.419740000 | 0.218170000 |
| 0.565860000 | 0.401710000 | 0.325240000 |
| 0.457840000 | 0.353910000 | 0.351590000 |
| 0.499430000 | 0.323150000 | 0.208620000 |
| 0.921510000 | 0.034040000 | 0.082760000 |

|             |             |             |
|-------------|-------------|-------------|
| 0.870350000 | 0.039850000 | 0.029450000 |
| 0.927680000 | 0.098100000 | 0.069060000 |

(18) the  $\text{NH}_4^+$  formation on  $\text{Mn}_4/\text{BNNT}$  (6, 6) ( $G = -174352.1471$  eV)

1.0

|                |               |               |
|----------------|---------------|---------------|
| 26.4829998016  | 0.0000000000  | 0.0000000000  |
| -13.2414999008 | 22.9349505966 | 0.0000000000  |
| 0.0000000000   | 0.0000000000  | 14.7571001053 |

|    |    |    |   |   |
|----|----|----|---|---|
| B  | N  | Mn | H | O |
| 71 | 73 | 4  | 8 | 2 |

Direct

|             |             |             |
|-------------|-------------|-------------|
| 0.404990000 | 0.327360000 | 0.014520000 |
| 0.368590000 | 0.382930000 | 0.097990000 |
| 0.292370000 | 0.394440000 | 0.015590000 |
| 0.110040000 | 0.290750000 | 0.015880000 |
| 0.199530000 | 0.360890000 | 0.099290000 |
| 0.048140000 | 0.198230000 | 0.099220000 |
| 0.031990000 | 0.110000000 | 0.015960000 |
| 0.141380000 | 0.039390000 | 0.016040000 |
| 0.066340000 | 0.051250000 | 0.099300000 |
| 0.234400000 | 0.074840000 | 0.099820000 |
| 0.323610000 | 0.147240000 | 0.017170000 |
| 0.387320000 | 0.240340000 | 0.100970000 |
| 0.421110000 | 0.338500000 | 0.181070000 |
| 0.374660000 | 0.388610000 | 0.264550000 |
| 0.292940000 | 0.392650000 | 0.182210000 |
| 0.110120000 | 0.290240000 | 0.182620000 |
| 0.200180000 | 0.359820000 | 0.265870000 |
| 0.047810000 | 0.197920000 | 0.265870000 |
| 0.031660000 | 0.109640000 | 0.182590000 |
| 0.140820000 | 0.038860000 | 0.182900000 |

|             |             |             |
|-------------|-------------|-------------|
| 0.065920000 | 0.050960000 | 0.266090000 |
| 0.234180000 | 0.074920000 | 0.266610000 |
| 0.321880000 | 0.148510000 | 0.183740000 |
| 0.392180000 | 0.239570000 | 0.268910000 |
| 0.372340000 | 0.384690000 | 0.432910000 |
| 0.294310000 | 0.392620000 | 0.348790000 |
| 0.110190000 | 0.289970000 | 0.349060000 |
| 0.200150000 | 0.360020000 | 0.431880000 |
| 0.047910000 | 0.197940000 | 0.432570000 |
| 0.031320000 | 0.109440000 | 0.349360000 |
| 0.140820000 | 0.039060000 | 0.349730000 |
| 0.066040000 | 0.051210000 | 0.432910000 |
| 0.234590000 | 0.075040000 | 0.432920000 |
| 0.323170000 | 0.147810000 | 0.349810000 |
| 0.395010000 | 0.239190000 | 0.431170000 |
| 0.408010000 | 0.328770000 | 0.515840000 |
| 0.366920000 | 0.381770000 | 0.599360000 |
| 0.292820000 | 0.393170000 | 0.515300000 |
| 0.110380000 | 0.290290000 | 0.515540000 |
| 0.199610000 | 0.361470000 | 0.598590000 |
| 0.048310000 | 0.198240000 | 0.599260000 |
| 0.031760000 | 0.109790000 | 0.516130000 |
| 0.141420000 | 0.039840000 | 0.516380000 |
| 0.066490000 | 0.051610000 | 0.599610000 |
| 0.235230000 | 0.075170000 | 0.599470000 |
| 0.324070000 | 0.147200000 | 0.515560000 |
| 0.388500000 | 0.238660000 | 0.598290000 |
| 0.402450000 | 0.324840000 | 0.683250000 |
| 0.366790000 | 0.382700000 | 0.765620000 |
| 0.292420000 | 0.395200000 | 0.682090000 |



|             |             |             |
|-------------|-------------|-------------|
| 0.110320000 | 0.290790000 | 0.682270000 |
| 0.199270000 | 0.362380000 | 0.765520000 |
| 0.048470000 | 0.198440000 | 0.765790000 |
| 0.031380000 | 0.109530000 | 0.682660000 |
| 0.141980000 | 0.040350000 | 0.682960000 |
| 0.066820000 | 0.051940000 | 0.766190000 |
| 0.235600000 | 0.074860000 | 0.766240000 |
| 0.325120000 | 0.146010000 | 0.682520000 |
| 0.387870000 | 0.237460000 | 0.766190000 |
| 0.402820000 | 0.325390000 | 0.848730000 |
| 0.367040000 | 0.382890000 | 0.931670000 |
| 0.292350000 | 0.395700000 | 0.848850000 |
| 0.110140000 | 0.290980000 | 0.849060000 |
| 0.199240000 | 0.362140000 | 0.932470000 |
| 0.048390000 | 0.198490000 | 0.932500000 |
| 0.032010000 | 0.109980000 | 0.849270000 |
| 0.142020000 | 0.040180000 | 0.849450000 |
| 0.066800000 | 0.051750000 | 0.932630000 |
| 0.235240000 | 0.074720000 | 0.933120000 |
| 0.325070000 | 0.145740000 | 0.850050000 |
| 0.388110000 | 0.238330000 | 0.933480000 |
| 0.403180000 | 0.354880000 | 0.096000000 |
| 0.347010000 | 0.394410000 | 0.015110000 |
| 0.166950000 | 0.343340000 | 0.015930000 |
| 0.262580000 | 0.389450000 | 0.099280000 |
| 0.082950000 | 0.261480000 | 0.099150000 |
| 0.034580000 | 0.166050000 | 0.015780000 |
| 0.086310000 | 0.039070000 | 0.015970000 |
| 0.035110000 | 0.083440000 | 0.099190000 |
| 0.171010000 | 0.043480000 | 0.099580000 |

|             |             |             |
|-------------|-------------|-------------|
| 0.267050000 | 0.093960000 | 0.016780000 |
| 0.403510000 | 0.271600000 | 0.016140000 |
| 0.349110000 | 0.177400000 | 0.100440000 |
| 0.419670000 | 0.373300000 | 0.258630000 |
| 0.348200000 | 0.394190000 | 0.181790000 |
| 0.167400000 | 0.342240000 | 0.182710000 |
| 0.263270000 | 0.387900000 | 0.265930000 |
| 0.082780000 | 0.261130000 | 0.265800000 |
| 0.034090000 | 0.165680000 | 0.182450000 |
| 0.085730000 | 0.038540000 | 0.182770000 |
| 0.034610000 | 0.083090000 | 0.265940000 |
| 0.170740000 | 0.043370000 | 0.266380000 |
| 0.266140000 | 0.094460000 | 0.183230000 |
| 0.405300000 | 0.273300000 | 0.184510000 |
| 0.348380000 | 0.177390000 | 0.266530000 |
| 0.410790000 | 0.361540000 | 0.437670000 |
| 0.350770000 | 0.395730000 | 0.348770000 |
| 0.167570000 | 0.341730000 | 0.348890000 |
| 0.263180000 | 0.388170000 | 0.431530000 |
| 0.082980000 | 0.261140000 | 0.432420000 |
| 0.033860000 | 0.165510000 | 0.349200000 |
| 0.085680000 | 0.038650000 | 0.349600000 |
| 0.034550000 | 0.083130000 | 0.432760000 |
| 0.171140000 | 0.043990000 | 0.432980000 |
| 0.266520000 | 0.094230000 | 0.349650000 |
| 0.420990000 | 0.268810000 | 0.349190000 |
| 0.350970000 | 0.176310000 | 0.432770000 |
| 0.398570000 | 0.350410000 | 0.600730000 |
| 0.347360000 | 0.393360000 | 0.515560000 |
| 0.167460000 | 0.342540000 | 0.515200000 |

|             |             |             |
|-------------|-------------|-------------|
| 0.262730000 | 0.390520000 | 0.598390000 |
| 0.083300000 | 0.261460000 | 0.599050000 |
| 0.034100000 | 0.165720000 | 0.515980000 |
| 0.086220000 | 0.039270000 | 0.516300000 |
| 0.034650000 | 0.083260000 | 0.599510000 |
| 0.171820000 | 0.044750000 | 0.599580000 |
| 0.267040000 | 0.094310000 | 0.516000000 |
| 0.405510000 | 0.271800000 | 0.515590000 |
| 0.351850000 | 0.175240000 | 0.599140000 |
| 0.398540000 | 0.351130000 | 0.765980000 |
| 0.346900000 | 0.394690000 | 0.682370000 |
| 0.167030000 | 0.343640000 | 0.682030000 |
| 0.262530000 | 0.391850000 | 0.765430000 |
| 0.083340000 | 0.261720000 | 0.765720000 |
| 0.034470000 | 0.165920000 | 0.682680000 |
| 0.086780000 | 0.039760000 | 0.682860000 |
| 0.035060000 | 0.083500000 | 0.766130000 |
| 0.172200000 | 0.044900000 | 0.766180000 |
| 0.267740000 | 0.093620000 | 0.682760000 |
| 0.401880000 | 0.269790000 | 0.683090000 |
| 0.352530000 | 0.174140000 | 0.766440000 |
| 0.399210000 | 0.351820000 | 0.931060000 |
| 0.346980000 | 0.395320000 | 0.848680000 |
| 0.166860000 | 0.343900000 | 0.849000000 |
| 0.262480000 | 0.391420000 | 0.932390000 |
| 0.083130000 | 0.261740000 | 0.932430000 |
| 0.034620000 | 0.166140000 | 0.849250000 |
| 0.086900000 | 0.039720000 | 0.849360000 |
| 0.035370000 | 0.083680000 | 0.932580000 |
| 0.171820000 | 0.044300000 | 0.932880000 |

|             |             |             |
|-------------|-------------|-------------|
| 0.267760000 | 0.093340000 | 0.849880000 |
| 0.401860000 | 0.270020000 | 0.849440000 |
| 0.351760000 | 0.175070000 | 0.933670000 |
| 0.576760000 | 0.340130000 | 0.026500000 |
| 0.503850000 | 0.418790000 | 0.211560000 |
| 0.570300000 | 0.404260000 | 0.322890000 |
| 0.461650000 | 0.356940000 | 0.352630000 |
| 0.498300000 | 0.320740000 | 0.213600000 |
| 0.577000000 | 0.344940000 | 0.957270000 |
| 0.555400000 | 0.296500000 | 0.041790000 |
| 0.555780000 | 0.359880000 | 0.057490000 |
| 0.620760000 | 0.361040000 | 0.052690000 |
| 0.709750000 | 0.420210000 | 0.049510000 |
| 0.755450000 | 0.337910000 | 0.138000000 |
| 0.698160000 | 0.374470000 | 0.125600000 |
| 0.744330000 | 0.357760000 | 0.229790000 |
| 0.683020000 | 0.399310000 | 0.099120000 |
| 0.723980000 | 0.334440000 | 0.176710000 |
